# Supplementary material for: Prevalence and individual and work-related factors associated with suicidal thoughts and behaviours among veterinarians in Norway: a cross-sectional, nationwide survey-based study (the NORVET study)
Source: PubMed Central journal article supplement — BMJ Open. 2022 Jan 3;12(1):e055827. doi: 10.1136/bmjopen-2021-055827 (PMC8724721; doi:10.1136/bmjopen-2021-055827), 2022-01-03
Supplement: bmjopen-2021-055827.draft_revisions.pdf [file bmjopen-2021-055827.draft_revisions.pdf]

# BMJ Open

BMJ Open is committed to open peer review. As part of this commitment we make the peer review history of every article we publish publicly available.

When an article is published we post the peer reviewers' comments and the authors' responses online. We also post the versions of the paper that were used during peer review. These are the versions that the peer review comments apply to.

The versions of the paper that follow are the versions that were submitted during the peer review process. They are not the versions of record or the final published versions. They should not be cited or distributed as the published version of this manuscript.

BMJ Open is an open access journal and the full, final, typeset and author-corrected version of record of the manuscript is available on our site with no access controls, subscription charges or pay-per-view fees (<http://bmjopen.bmj.com>).

If you have any questions on BMJ Open's open peer review process please email [info.bmjopen@bmj.com](mailto:info.bmjopen@bmj.com)

# BMJ Open

## Suicidal behavior in a nationwide cross-sectional study of veterinarians in Norway (The NORVET study): individual and work-related factors

|                               |                                                                                                                                                                                                                                                                                                                                                           |
|-------------------------------|-----------------------------------------------------------------------------------------------------------------------------------------------------------------------------------------------------------------------------------------------------------------------------------------------------------------------------------------------------------|
| Journal:                      | <i>BMJ Open</i>                                                                                                                                                                                                                                                                                                                                           |
| Manuscript ID                 | bmjopen-2021-055827                                                                                                                                                                                                                                                                                                                                       |
| Article Type:                 | Original research                                                                                                                                                                                                                                                                                                                                         |
| Date Submitted by the Author: | 26-Jul-2021                                                                                                                                                                                                                                                                                                                                               |
| Complete List of Authors:     | Dalum, Helene; University of Oslo Faculty of Medicine, Department of Behavioural Medicine<br>Tyssen, Reidar; University of Oslo Faculty of Medicine, Department of Behavioural Sciences in Medicine<br>Hem, Erlend; University of Oslo Faculty of Medicine, Dept of the Behavioural Sciences in Medicine; Institute for Studies of the Medical Profession |
| Keywords:                     | EPIDEMIOLOGY, MENTAL HEALTH, OCCUPATIONAL & INDUSTRIAL MEDICINE, Suicide & self-harm < PSYCHIATRY                                                                                                                                                                                                                                                         |
|                               |                                                                                                                                                                                                                                                                                                                                                           |

SCHOLARONE™  
Manuscripts

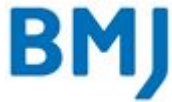

I, the Submitting Author has the right to grant and does grant on behalf of all authors of the Work (as defined in the below author licence), an exclusive licence and/or a non-exclusive licence for contributions from authors who are: i) UK Crown employees; ii) where BMJ has agreed a CC-BY licence shall apply, and/or iii) in accordance with the terms applicable for US Federal Government officers or employees acting as part of their official duties; on a worldwide, perpetual, irrevocable, royalty-free basis to BMJ Publishing Group Ltd ("BMJ") its licensees and where the relevant Journal is co-owned by BMJ to the co-owners of the Journal, to publish the Work in this journal and any other BMJ products and to exploit all rights, as set out in our [licence](#).

The Submitting Author accepts and understands that any supply made under these terms is made by BMJ to the Submitting Author unless you are acting as an employee on behalf of your employer or a postgraduate student of an affiliated institution which is paying any applicable article publishing charge ("APC") for Open Access articles. Where the Submitting Author wishes to make the Work available on an Open Access basis (and intends to pay the relevant APC), the terms of reuse of such Open Access shall be governed by a Creative Commons licence – details of these licences and which [Creative Commons](#) licence will apply to this Work are set out in our licence referred to above.

Other than as permitted in any relevant BMJ Author's Self Archiving Policies, I confirm this Work has not been accepted for publication elsewhere, is not being considered for publication elsewhere and does not duplicate material already published. I confirm all authors consent to publication of this Work and authorise the granting of this licence.

**TITLE PAGE:****TITLE**

Suicidal behavior in a nationwide cross-sectional study of veterinarians in Norway (The NORVET study): individual and work-related factors

**AUTHORS NAMES AND AFFILIATIONS**

Helene Seljenes Dalum<sup>a</sup>, Reidar Tyssen<sup>a</sup>, Erlend Hem<sup>a, b</sup>.

<sup>a</sup> Department of Behavioural Medicine, Institute of Basic Medical Sciences, Faculty of Medicine, University of Oslo, Norway.

<sup>b</sup> Institute for Studies of the Medical Profession, Oslo, Norway.

**CORRESPONDING AUTHOR**

Helene Seljenes Dalum

Department of Behavioural Medicine

Institute of Basic Medical Sciences

Faculty of Medicine

University of Oslo

P.O. Box 1111 Blindern

NO-0317 Oslo

Norway

E-mail: [h.s.dalum@medisin.uio.no](mailto:h.s.dalum@medisin.uio.no)

Word count: 3733 (excluding title page, abstract, tables and figures, acknowledgements, and references)

1  
2  
3  
4  
5  
6  
7  
8  
9  
10  
11  
12  
13  
14  
15  
16  
17  
18  
19  
20  
21  
22  
23  
24  
25  
26  
27  
28  
29  
30  
31  
32  
33  
34  
35  
36  
37  
38  
39  
40  
41  
42  
43  
44  
45  
46  
47  
48  
49  
50  
51  
52  
53  
54  
55  
56  
57  
58  
59  
60

For peer review only

## ABSTRACT

**Objectives:** To investigate the self-reported level, contributing factors and independent factors associated with suicidal behavior among veterinarians in Norway.

**Design:** Cross-sectional, nationwide survey.

**Participants:** Of the eligible sample of 3464 veterinarians, 2596 responses were received (response rate: 75 %).

**Main outcome measure:** Paykel's five-item questionnaire about suicidal behavior.

**Results:** In total, 27 % of veterinarians in Norway felt that life was not worth living during the last year, 5 % had serious suicidal thoughts, and 0.2 % had attempted suicide. Female veterinarians reported significantly higher levels of suicidal feelings and thoughts than their male colleagues. For example, women had nearly twice the level of serious suicidal thoughts as their male colleagues (6.1 % vs. 3.6 %, chi-square 6.5,  $p < 0.001$ ). Independent factors associated with serious suicidal thoughts were being single (OR = 1.76, 95 %CI 1.14-2.71,  $p < 0.05$ ), negative life events (OR = 1.43, 95 %CI 1.22-1.67,  $p < 0.001$ ), and the presence of mental distress (OR = 2.75, 95 %CI 2.11-3.44,  $p < 0.001$ ). The veterinarians related their serious suicidal thoughts to work and personal problems, and a lesser degree to family, social, and other problems. Nearly twice as many women (53 %) as men (28 %) reported work problems as the most important contributing factor to their serious suicidal thoughts (chi-square: 4.99,  $p = 0.03$ ). A total of 4 % reported work problems as the only factor of importance.

**Conclusions:** Veterinarians in Norway have relatively high levels of suicidal feelings and thoughts, including serious suicidal thoughts. In the multivariate analyses, the individual factors were more important than the work-related ones, while work problems were the most reported contributing factor to serious suicidal thoughts by the veterinarians themselves. The role of gender and specific work-related factors should be further investigated to better understand the complexity of suicidal behavior among veterinarians.

**Keywords:** Veterinarians – suicidal behavior – mental distress – personality traits –

**ARTICLE SUMMARY – STRENGTHS AND LIMITATIONS OF THIS STUDY**

## Strengths:

- Nationwide study of suicidal behavior in veterinarians, in all main fields of work.
- High response rate (75 %).
- Extensive questionnaire.

## Limitations:

- Cross-sectional design.
- Possible limited generalizability, due to differences in organization of work life in other countries.

## INTRODUCTION

Several studies have shown increased suicide rates among veterinarians. A review from 2010 found elevated suicide rates in all but one of the 15 studies published at the time.<sup>1</sup> Recent studies have also indicated increased raised suicide rates in the profession.<sup>2-4</sup> Furthermore, three recent studies found a higher prevalence of suicidal ideation among veterinarians than the general population.<sup>5-7</sup>

There is little knowledge about the contribution of individual and work-related factors to suicidal behavior in veterinarians. In a systematic review from 2012, which included 52 papers, the authors highlighted the paucity of research that investigated the factors that contribute to suicide among veterinarians, and that many of the studies were of poor quality.<sup>8</sup> In an interview study with veterinarians with a history of suicidal behavior, Platt et al. found that being a veterinarian contributed to their suicidal behaviour; they emphasized patient issues, responsibility, and poor work/life balance.<sup>9</sup> It has been suggested that suicidal ideation among veterinarians is linked to the demanding nature of their work.<sup>10</sup> Dealing with bereaved clients (i.e. animal owners) has been shown to impact the mental health of veterinarians,<sup>11</sup> and an interview study found that attachment loss and trauma contributed to both depression and suicidality.<sup>12</sup> A recent qualitative study investigating occupational stress among veterinarians found that preoccupation, self-doubt, conflicting responsibilities (care of animals/human clients/financial demands), and insufficient support were important factors of job stress.<sup>13</sup> When searching for independent work-related factors that may be associated with suicidal behavior, it is important to control for known individual factors linked to such behavior. These include having no partner,<sup>14 15</sup> negative life events,<sup>16</sup> anxiety symptoms, depressive symptoms,<sup>15 17</sup> personality problems,<sup>18 19</sup> and the problematic use of alcohol.<sup>17</sup>

The gender balance among veterinarians has changed significantly over the past decades, from 66 % male veterinary students in Norway in 1980 to only 16 % in 2020 (personal communication, Ann Kristin Egeli, and Norwegian University of Life Sciences, June 22<sup>nd</sup>, 2021). As of June 2021, 69 % of veterinarians holding authorization in Norway were women (personal communication, Bente N. Reve, and The Norwegian Food Safety Authority, July 12<sup>th</sup> 2021). The gender shift in the profession corresponds to that in several other countries.<sup>20-22</sup> Studies have shown that being female and of younger age increases the risk of serious psychological distress as a veterinarian.<sup>7 8 11</sup> The prevalence of psychological distress, such as anxiety symptoms and depressive symptoms, is also higher among female veterinarians.<sup>5 11 23</sup>

Furthermore, there is substantial evidence that certain personality traits may increase the risk of suicide.<sup>19 24</sup> Reality weakness, a deviant trait including chronic illusions, paranoid traits, identity-insecurity, and relational problems,<sup>25</sup> has demonstrated predictive validity in Norwegian medical



1  
2  
3 doctors regarding the aggravation of suicidal ideation.<sup>18</sup> Reality weakness is a significant predictor of  
4 serious suicidal ideation in other occupational groups as well.<sup>26 27</sup>  
5  
6

7 Over the last decades, the veterinary profession has turned from agriculture and food-producing  
8 animal medicine to an increasing proportion working with companion animals. Two US studies have  
9 found a higher suicide rate among companion animal practitioners compared to other  
10 specializations,<sup>3 28</sup> and it has been shown that veterinarians in this field more often reported suicidal  
11 thoughts than other veterinarians.<sup>29</sup> Thus, attention is required in the different fields of veterinary  
12 medicine.  
13  
14  
15  
16

17  
18 Few studies have investigated the direct association and contribution of individual and work-related  
19 factors to suicidal behavior. Therefore, we investigated the following questions:  
20  
21

- 22 (1) What is the level of suicidal behavior among veterinarians in Norway, and are there any gender  
23 differences?  
24  
25 (2) What do veterinarians in Norway regard as contributing factors to their serious suicidal thoughts?  
26  
27 (3) What are the independent individual and work-related predictors for serious suicidal thoughts?  
28  
29  
30  
31

## 32 **METHODS**

### 33 **Sample**

34  
35 The sample included all veterinarians in Norway, holding valid authorization as of May 2020 (n = 4256),  
36 according to information retrieved from the Norwegian Food Safety Authority. We excluded  
37 veterinarians for the following reasons: no residential address in Norway (n = 527), current address  
38 unknown (n = 196), those working abroad (n = 62) and those who were deceased (n = 7). This resulted  
39 in an eligible sample of 3464 veterinarians.  
40  
41  
42  
43  
44  
45  
46  
47

### 48 **Questionnaire**

49  
50 A questionnaire of 12 pages, an information sheet and a reply-paid envelope were distributed by  
51 surface mail in November 2020. The information sheet included contact information to a psychiatrist  
52 in the research group and the colleague-support of the Norwegian Veterinary Association. Two  
53 reminders were sent in January and February 2021, respectively. Five gift cards from a sports shop  
54 were placed in a draw for respondents as incentives to increase the response rate. An external  
55 company managed both the data collection and prize awards. Respondents returned their  
56  
57  
58  
59  
60

1  
2  
3 questionnaires in a sealed envelope, and the identities of the respondents were unknown to the  
4 researchers throughout.  
5

6  
7 The Regional Committee for Medical and Health Research Ethics South-East C (132704), and the  
8 Norwegian Centre for Research Data (674793) approved this study.  
9  
10

### 11 12 13 14 **Instruments – dependent variable**

15  
16 Paykel's questionnaire about suicidal thoughts and attempts was the dependent variable in this  
17 study.<sup>30</sup> It is a five-item instrument developed to study suicidal feelings in the general population.  
18 The items represent increasing severity, from unspecific suicidal feelings to actual suicide attempt.  
19 Previous studies on several professions in Norway have validated this instrument.<sup>14 15 26 27 31</sup> The five  
20 items have the following wording: 1. 'Have you ever felt that life was not worth living?'  
21 2. 'Have you ever wished you were dead – for instance, that you could go to sleep and not wake up?'  
22 3. 'Have you ever thought of taking your life, even if you would not really do it?' 4. 'Have you ever  
23 reached the point where you seriously considered taking your life, or perhaps made plans how you  
24 would go about doing it?' 5. 'Have you ever made an attempt to take your life?' Question four was  
25 slightly altered in the Norwegian translation, to: "... and even made plans...", reinforcing the  
26 seriousness in this statement.<sup>15</sup> The responses to each question were never, hardly ever, sometimes  
27 or often. The preceding year's suicidal thoughts and attempts were investigated in the present study.  
28 For questions 4. and 5., an additional question was asked: 'To what extent do you think the following  
29 factors influenced you to consider taking your life', with five response categories.  
30  
31  
32  
33  
34  
35  
36  
37  
38  
39  
40  
41  
42  
43

### 44 **Independent variables – individual factors**

45 The personality trait *reality weakness* was measured using the nine-item reality weakness dimension  
46 of Torgersen's Basic Character Inventory (BCI).<sup>32</sup> Each item had a dichotomous ('agree'/'do not  
47 agree') response, with a total sum score from 0 to 9. BCI-Reality weakness is an original, deviant trait  
48 related to perceptions and ideations on the borderline between reality and fantasy; this dimension  
49 also measures chronic illusions, paranoid traits, and traits related to severe personality disorders.<sup>25 33</sup>  
50 Examples of items are 'I feel lonely most of the time' and 'Sometimes I feel I am not myself'. This  
51 measure has previously been validated to predict emotional disturbance, such as serious suicidal  
52 thoughts, severe depression, and lack of help-seeking among physicians.<sup>33</sup>  
53  
54  
55  
56  
57  
58  
59  
60

1  
2  
3 The Norwegian Centre for Research Data claimed the use of age intervals to keep the data as  
4 unidentifiable as possible. Therefore, *age* was reported in the following intervals: 20-25, 26-30 (...) up  
5 to 66-70 and >70 years. In this study, *marital status* was dichotomized into married/cohabitant and  
6 single/divorced/separated/widow(er) (coded 0 and 1, respectively).  
7  
8

9  
10 *Life events during the last 12 months* were measured by 17 items, previously used by among others,  
11 Tyssen et al.,<sup>15 34</sup> and adapted to veterinarians. The adaptations were mainly linguistic and included  
12 the removal of items specific to physicians. All items were coded as 0 or 1, and the variable  
13 comprised the sum score of all items. To test the effects on serious suicidal thoughts, we used the  
14 weighted total score of all items significantly associated with such thoughts.  
15  
16  
17  
18

19  
20 *Mental distress (anxiety symptoms and depressive symptoms)* in the last 14 days was measured using  
21 SCL-5, a five-item version of the Symptom Check List-25.<sup>35</sup> This five-item version is based on a factor  
22 analysis by Tambs and Moum,<sup>36</sup> and contains questions about how much one is bothered by the  
23 following: 1. 'Feeling fearful', 2. 'Nervousness or shakiness inside', 3. 'Feeling hopeless about the  
24 future', 4. 'Feeling blue', 5. 'Worrying too much about things'. Each item was measured on a scale  
25 from 1 to 5 from 'not at all' to 'very much'. The sum score is used to indicate the level of mental  
26 distress. This version has been validated in medical students and physicians in Norway.<sup>37 38</sup>  
27  
28  
29  
30

31  
32 *Alcohol to cope* was measured by a single item originally used in national surveys in the USA.<sup>39</sup> The  
33 item is: 'When you feel worried, tense, or nervous, do you ever drink alcoholic beverages to help you  
34 handle things?' The alternatives were 'never', 'seldom', 'now and then' and 'often'. In the analyses,  
35 responses were dichotomized into 0 'Never' and 1 'Any frequency', as validated in previous  
36 Norwegian studies.<sup>40-42</sup> The reason for dichotomizing the response was for cultural purposes and we  
37 wanted a clear distinction between drinking to cope with tension or not, as accounted for in detail  
38 elsewhere.<sup>40</sup>  
39  
40  
41  
42  
43  
44  
45  
46  
47

#### 48 **Independent variables – work-related factors**

49  
50 *The main fields of work* were reported as 'companion animal practice', 'production animal practice',  
51 'mixed clinical practice', 'equine practice', 'aquaculture', 'public administration',  
52 'academia/researcher', 'pensioners' and 'others'. Those who classified themselves as pensioners  
53 were excluded from the logistic regression analyses, because work-related factors were included in  
54 the model.  
55  
56  
57  
58  
59  
60

1  
2  
3 *Job stress* was measured by a modified version of Cooper's Job Stress Questionnaire,<sup>43 44</sup> with minor  
4 adaptations to veterinarians' work conditions. These adaptations were mainly linguistic, but some  
5 items specific to the veterinary profession were added (as 'cross pressure between economy/animal  
6 welfare/ethics'). A factor analysis (principal component with varimax rotation, including scree plot  
7 evaluation) identified three job stress factors: *emotional demands*, *work/life balance*, and *fear of*  
8 *complaints/criticism*. The first factor, *emotional demands* (Cronbach's alpha=0.87), contained six  
9 items: 1. 'Daily contact with dying and critically ill animals', 2. 'Taking care of terminally ill animals  
10 and their owners', 3. 'Taking care of suffering animals', 4. 'Requests about animals from friends and  
11 family', 5. 'Requests about animals from relatives', and 6. 'Emotional involvement with patients'. The  
12 second factor, *work/life balance* (Cronbach's alpha=0.86), consisted of five items: 1. 'Work affects  
13 family life', 2. 'Managing a balance between work and personal life', 3. 'Work affects social life', 4.  
14 'Time pressure', and 5. 'Interruptions and nagging at work'. The third factor, *fear of*  
15 *complaints/criticism* (Cronbach's alpha=0.88), consisted of three items: 1. 'Worries about complaints  
16 from animal owners/customers', 2. 'Animal owners/customers do not appreciate your work', and 3.  
17 'Dealing with challenging animal owners/customers'.  
18  
19  
20  
21  
22  
23  
24  
25  
26  
27  
28  
29  
30  
31

### 32 **Patient and Public Involvement**

33  
34 The Norwegian Veterinary Association appointed a reference group for this project consisting of  
35 seven veterinarians from each of the professional subgroups: Small Animal-, Equine-, Production  
36 Animal and Aquaculture Veterinary Association, and the Association of Veterinarians in Public Health  
37 Medicine, the Veterinary Students' association and the Pensioners' Association. These veterinarians  
38 contributed with valuable input both to the design of the questionnaire, hypotheses, and aims of the  
39 present study.  
40  
41  
42  
43  
44  
45  
46  
47

### 48 **Statistics**

49 SPSS version 27 and StataSE 16 were used for the statistical analyses. The  $\chi^2$  test was used to test for  
50 group differences. Simultaneous effects were analyzed through hierarchical logistic regression with  
51 blockwise analyses to separate the effects of individual and work-related factors. The level of  
52 significance was set at 0.05. To investigate gender-specific effects, we entered two-way interaction  
53 terms between gender and the other independent variables in separate analyses with the main  
54 effect included in the equations. Missing values were coded as 'system missing'.  
55  
56  
57  
58  
59  
60

## RESULTS

### Demographics

Of the 3464 eligible participants, we received 2596 responses, resulting in a response rate of 75 %.

The most frequently reported age category was 41 – 45 years of age. The age varied between genders, with a higher proportion of younger women, and the majority of men were older than 50 years (Figure 1). In total, 69 % were female and 31 % male (Table 1), which is an accurate reflection of the actual gender distribution of veterinarians in Norway.

*Insert Figure 1 (age distribution) about here.*

Table 1 – Description of sample

| Variable                  | Range of values | Frequency (%) | Mean (SD)   |
|---------------------------|-----------------|---------------|-------------|
| <b>Gender</b>             |                 |               |             |
| Female                    |                 | 1776 (69.6 %) |             |
| Male                      |                 | 776 (30.4 %)  |             |
| <b>Age</b>                |                 |               |             |
| 20-30                     |                 | 274 (10.8 %)  |             |
| 31-40                     |                 | 697 (27.4 %)  |             |
| 41-50                     |                 | 667 (26.2 %)  |             |
| 51-60                     |                 | 432 (16.9 %)  |             |
| 61-70                     |                 | 318 (12.5 %)  |             |
| >70                       |                 | 159 (6.2 %)   |             |
| <b>Marital status</b>     |                 |               |             |
| Married/cohabiting        |                 | 1962 (78 %)   |             |
| Single/divorced/widow(er) |                 | 552 (22 %)    |             |
| <b>Life events</b>        | 0-9             |               | 0.54 (0.89) |
| <b>SCL-5</b>              | 1-5             |               | 2.00 (0.98) |

|                                      |      |               |             |
|--------------------------------------|------|---------------|-------------|
| <b>Reality weakness</b>              | 0-9  |               | 1.38 (1.85) |
| <b>Alcohol to cope</b>               |      |               |             |
| Never                                |      | 1769 (71 %)   |             |
| Any frequency                        |      | 722 (29 %)    |             |
| <b>Main field of work</b>            |      |               |             |
| Companion animal practice            |      | 802 (31.8 %)  |             |
| Public administration                |      | 402 (15.9 %)  |             |
| Mixed clinical practice              |      | 268 (10.6 %)  |             |
| Academia/research                    |      | 202 (8.0 %)   |             |
| Production animal practice           |      | 177 (7.0 %)   |             |
| Aquaculture                          |      | 121 (4.8 %)   |             |
| Equine practice                      |      | 102 (4.0 %)   |             |
| Other                                |      | 250 (9.9 %)   |             |
| Pensioner                            |      | 198 (7.9 %)   |             |
| <b>Job stress</b>                    |      |               |             |
| Emotional demands                    | 6-30 |               | 11.9 (4.7)  |
| Work/life-balance                    | 5-25 |               | 13.3 (4.9)  |
| Fear of complaints                   | 3-15 |               | 9.2 (3.5)   |
| <b>Connection to work-life</b>       |      |               |             |
| Employed                             |      | 1561 (63.0 %) |             |
| Self-employed                        |      | 573 (23.1 %)  |             |
| Other                                |      | 217 (8.8 %)   |             |
| Two or more connections to work life |      | 127 (5.1 %)   |             |
| <b>Position type</b>                 |      |               |             |
| Permanent position                   |      | 2023 (88.1 %) |             |
| Temporary position                   |      | 70 (3 %)      |             |

|                                                            |  |               |  |
|------------------------------------------------------------|--|---------------|--|
| Temporary educational position                             |  | 50 (2.2 %)    |  |
| Other                                                      |  | 153 (6.7 %)   |  |
| <b>Working full-time</b>                                   |  | 1922 (81.1 %) |  |
| <b>Frequency of working overtime (weekly or bi-weekly)</b> |  | 1550 (67.9 %) |  |

### Level of suicidal behavior during the last year

27 % of the veterinarians reported that they felt that life was not worth living, 20 % had thought of suicide, even though they knew that they would not do it, 5 % reported that they had serious suicidal thoughts, and six persons (0.2 %) had attempted suicide (Table 2). Female veterinarians reported significantly higher levels of suicidal feelings and thoughts than male colleagues. This gender difference remained throughout all items; for serious suicidal thoughts; women had nearly twice as high levels as their male colleagues (6.2 % vs. 3.6 %, chi-square: 6.5, p=0.011).

Table 2 – Prevalence of suicidal feelings and thoughts among veterinarians in Norway according to gender

| Item                                         | All          | Men         | Women       | Total n for each item | $\chi^2$ and p-value |
|----------------------------------------------|--------------|-------------|-------------|-----------------------|----------------------|
| <sup>1.</sup> Felt life was not worth living | 682 (26.6 %) | 148 (19.3%) | 522 (29.7%) | 2567                  | 29.4, p<0.001        |
| <sup>2.</sup> Wished you were dead           | 498 (19.4 %) | 96 (12.5%)  | 394 (22.5%) | 2565                  | 33.6, p<0.001        |
| <sup>3.</sup> Thoughts of taking life        | 503 (19.6 %) | 102 (13.3%) | 391 (22.3%) | 2565                  | 26.9, p<0.001        |

|    |                                       |             |           |            |      |                 |
|----|---------------------------------------|-------------|-----------|------------|------|-----------------|
| 4. | Seriously considered taking your life | 139 (5.4 %) | 28 (3.6%) | 108 (6.2%) | 2562 | 6.5,<br>p=0.011 |
| 5. | Made a suicide attempt                | 6 (0.2 %)   | 1 (0.1%)  | 5 (0.3%)   | 2537 | NA              |

Not all veterinarians reported gender (n=2554). This leads to a difference in total sum for men + women compared to "all."

### Self-reported factors contributing to serious suicidal thoughts

Among the veterinarians reporting serious suicidal thoughts (n=139), work problems were the most frequently reported contributing factor (48 %), followed by personal problems (37 %) (Table 3). The only significant gender difference was regarding work problems, with nearly twice as many women (53 %) as men (28 %) reporting work problems as the most important contributing factor to their serious suicidal thoughts (chi-square: 4.99, p = 0.03, Fisher's exact), and 4.3 % reported work problems as the only factor of importance.

Table 3 - Contributing factors to serious suicidal thoughts among veterinarians in Norway

|                   | Not at all + A little + Somewhat |               |               | Quite a bit + Very much |              |               | Total n |
|-------------------|----------------------------------|---------------|---------------|-------------------------|--------------|---------------|---------|
|                   | N (%)                            |               |               | N (%)                   |              |               |         |
|                   | Total                            | Men           | Women         | Total                   | Men          | Women         |         |
| Personal problems | 84<br>(63.2%)                    | 17<br>(65.4%) | 67<br>(63.8%) | 49<br>(36.8%)           | 9<br>(34.6%) | 38<br>(36.2%) | 133     |
| Family problems   | 91<br>(68.4%)                    | 19<br>(79.2%) | 72<br>(67.9%) | 42<br>(31.6%)           | 5<br>(20.8%) | 34<br>(32.1%) | 133     |
| Social problems   | 108<br>(81.2%)                   | 21<br>(84.0%) | 86<br>(81.1%) | 25<br>(18.8%)           | 4<br>(16.0%) | 20<br>(18.9%) | 133     |
| Work problems     | 70<br>(51.9%)                    | 18<br>(72.0%) | 51<br>(47.2%) | 65<br>(48.1%)           | 7<br>(28.0%) | 57<br>(52.8%) | 135     |



|                |               |               |               |               |              |               |     |
|----------------|---------------|---------------|---------------|---------------|--------------|---------------|-----|
| Other problems | 90<br>(72.6%) | 20<br>(83.3%) | 70<br>(71.4%) | 34<br>(27.4%) | 4<br>(16.7%) | 28<br>(28.6%) | 124 |
|----------------|---------------|---------------|---------------|---------------|--------------|---------------|-----|

Item four of Paykel's questionnaire was answered by n= 2562 veterinarians (men=766, women=1754). The question was answered positively by n=139 (see Table 1).

### Multiple logistic regression of predictors of serious suicidal thoughts

Being single, negative life events, anxiety symptoms and depressive symptoms, reality weakness, use of alcohol to cope, and the three job stress factors were significant unadjusted (crude) predictors (see Table 4). In the adjusted model, the significant predictors were being single, negative life events, and mental distress. There was no gender effect. No significant effect was found within the different fields of work or any of the three job stress factors in the adjusted model (Table 4).

An additional multivariate analysis was conducted, similar to the multivariate analysis in the previous sub-section, but without the variables *reality weakness* and *mental distress*. When processing the individual and work-related factors without the two variables of reality weakness and mental distress, the significant predictors were being single, negative life events, use of alcohol to cope with tension, and all three job stress factors: *emotional demands*, *work/life balance*, and *fear of complaints/criticism* (OR = 2.17, 95 % CI 1.44-3.27 for single status, OR = 1.61, 95 %CI 1.39-1.86 for negative life events, OR = 1.52, 95 % CI 1.02-2.27 for alcohol to cope, OR = 1.05, 95 %CI 1.00-1.10 for emotional demands, OR = 1.08, 95 % CI 1.03-1.13 for work/life balance, and OR = 1.08, 95 %CI 1.00-1.16 for fear of complaints). This means that all the job stress factors were probably confounded by mental distress and reality weakness, and they may explain both job stress and serious suicidal thoughts. (Table 4).

Table 4 – Predictors of serious suicidal thoughts among veterinarians in Norway

|                                       | Crude   |                | Adjusted |                |
|---------------------------------------|---------|----------------|----------|----------------|
|                                       | OR      | 95 % CI        | OR       | 95 % CI        |
| Female                                | 1.55    | 0.999 to 2.401 | 0.88     | 0.49 to 1.57   |
| Age                                   | 0.93    | 0.86 to 1.00   | 1.11     | 0.996 to 1.235 |
| Single                                | 2.38*** | 1.65 to 3.43   | 1.76*    | 1.13 to 2.72   |
| Negative life events <sup>1</sup>     | 1.78*** | 1.55 to 2.04   | 1.43***  | 1.22 to 1.68   |
| SCL-5                                 | 3.08*** | 2.61 to 3.64   | 2.75***  | 2.14 to 3.52   |
| Reality weakness                      | 1.47*** | 1.37 to 1.59   | 1.10     | 0.99 to 1.22   |
| Alcohol to cope                       | 2.14*** | 1.51 to 3.04   | 1.09     | 0.72 to 1.67   |
| Main field of work<br>(ref. category= |         |                |          |                |

|                                 |         |              |      |              |
|---------------------------------|---------|--------------|------|--------------|
| <b>mixed clinical practice)</b> |         |              |      |              |
| Companion animals               | 1.38    | 0.74 to 2.57 | 1.01 | 0.50 to 2.06 |
| Production animals              | 1.28    | 0.56 to 2.94 | 1.97 | 0.77 to 5.05 |
| Equine practice                 | 1.21    | 0.45 to 3.28 | 1.02 | 0.32 to 3.26 |
| Aquaculture                     | 1.01    | 0.37 to 2.73 | 1.07 | 0.32 to 3.61 |
| Public administration           | 1.08    | 0.53 to 2.20 | 1.15 | 0.49 to 2.71 |
| Academia/research               | 1.12    | 0.49 to 2.56 | 1.07 | 0.39 to 2.99 |
| Other                           | 0.82    | 0.35 to 1.91 | 0.70 | 0.24 to 2.02 |
| <b>Job stress</b>               |         |              |      |              |
| Emotional demands               | 1.12*** | 1.08-1.16    | 1.02 | 0.97 to 1.07 |
| Work/life-balance               | 1.13*** | 1.09-1.17    | 1.00 | 0.95 to 1.05 |
| Fear of complaints              | 1.18*** | 1.11-1.25    | 1.01 | 0.93 to 1.09 |

<sup>1</sup>The variable life events was entered into the model as a weighted variable ('Negative life events'), comprising the sum score of life events that was significant in a univariate model with the dependent variable.

\*P<0.05

\*\*P<0.01

\*\*\*P<0.001

We found significant interactions between gender and negative life events ( $p = 0.015$ ), with clearly steeper gradients for females. There was also an interaction between gender and work/life balance ( $p = 0.026$ ), and the increase in suicidal thoughts with higher work/life imbalance was stronger among males than among females.

## DISCUSSION

The main finding of this study was that more than one-fourth of the veterinarians in Norway felt that life was not worth living during the last year, 5 % had serious suicidal thoughts, and 0.2 % had attempted suicide. Female veterinarians reported significantly more suicidal feelings and thoughts than their male colleagues. Independent factors associated with serious suicidal thoughts were being single, negative life events, and mental distress. The veterinarians considered their serious suicidal thoughts mainly as work and personal problems, and to a lesser degree, family, social, and other problems.

Furthermore, veterinarians reported both suicidal feelings and serious suicidal thoughts more frequently (26.6 % and 5.4 %, respectively) than physicians (16.6 % and 2.6 %, respectively),<sup>14</sup> and police (8.9 % and 1.7 %, respectively)<sup>26</sup> in Norway. Furthermore, veterinarians regarded work problems as the most important contributing factor, which suggests that work factors play a more important role in suicidal thoughts in veterinarians than in physicians. A previous study found that physicians most frequently regarded personal and family problems as the most important factors.<sup>14</sup>

1  
2  
3 Regarding suicide attempts, veterinarians had levels (0.2%) comparable to those of physicians and  
4 police (0.3% and 0.1%, respectively).<sup>14 26</sup>  
5  
6

7 The relatively high levels of suicidal feelings and thoughts concur with findings among veterinarians  
8 in other countries. Two studies used "National Survey of Psychiatric Morbidity",<sup>5 45</sup> an item originally  
9 sourced from Paykel's instrument.<sup>30</sup> These items use the same wording for items one and three,  
10 which makes comparison possible. Suicidal feelings among veterinarians in Norway were slightly  
11 higher (26.6%) than among those in the UK (23.0%)<sup>45</sup> and Canada (17.9%),<sup>5</sup> whereas suicidal thoughts  
12 were at the same level (19.6%, 21.3%, and 19.4%, respectively). However, veterinarians in Canada  
13 reported higher levels (17.0%) of serious suicidal thoughts than in Norway (5.4%), which is probably  
14 due to the reporting period in the Canadian survey being 'since the start of veterinary education',  
15 while in the present study, the reporting period was the preceding year.  
16  
17  
18  
19  
20  
21  
22

23 Moreover, like female physicians,<sup>14</sup> female veterinarians had higher levels of suicidal feelings and  
24 thoughts than their male colleagues. Gender differences were present in the contributing factors, as  
25 female veterinarians reported work problems more frequently than men. Veterinarians consider  
26 work problems more important than physicians. It may be speculated that this, in part, may be  
27 explained by the fact that veterinarians in Norway have less undergraduate training in  
28 communication, psychology and coping skills, and experience more professional isolation.  
29 Additionally, animal health care poses a cost issue (in Norway, human health care costs are funded  
30 by tax revenues), resulting in cross pressure for veterinarians at the intersection of animal welfare,  
31 costs, and ethics. Conflicting responsibilities in the veterinary profession may be an overarching  
32 theme contributing to significant stress among veterinarians.<sup>13</sup>  
33  
34  
35  
36  
37  
38  
39  
40

41 Today, approximately 70 % of veterinarians in Norway are female, and this proportion is expected to  
42 increase. There was no significant effect of gender in the adjusted model. This may be because age  
43 was highly correlated with the female gender. Females reported significantly higher levels of suicidal  
44 behavior than males. Furthermore, females regarded work problems as the factor that contributes  
45 the most to their serious suicidal thoughts. Being single and experiencing negative life events  
46 predicted serious suicidal thoughts in the present study (76 % and 43 % higher odds, respectively).  
47 These findings are consistent with studies on physicians and others.<sup>14 15 18</sup> In contrast to physicians,  
48 where family and relationship issues were the most significant negative life events,<sup>14</sup> economic  
49 problems (OR = 10.88, 95 % CI 5.20-22.78, p<0.001) were the most significant negative life event for  
50 veterinarians. This also supports the hypothesis that there are other factors associated with suicidal  
51 thoughts among veterinarians than with physicians and that economic concerns are more important  
52 with veterinarians. In fact, in a recent qualitative study from Australia, veterinarians were asked what  
53  
54  
55  
56  
57  
58  
59  
60

1  
2  
3 they would do if they could change something in the profession, and the most common response  
4 was to remove money from the decision-making process.<sup>13</sup> Contrary to the findings in a recent  
5 review,<sup>16</sup> experiencing negative life events had a greater impact on serious suicidal thoughts among  
6 women than among men. Furthermore, work/life balance had a greater impact on serious suicidal  
7 thoughts among men than among women. These findings warrant further research.  
8  
9

10  
11  
12 Research on veterinarians and alcohol use is scarce,<sup>8,46</sup> and the finding that the use of alcohol to cope  
13 with tension was significant in the univariate model warrants further research. In a study examining  
14 drug-caused deaths in Australia, veterinarians were the group with the highest prevalence of alcohol  
15 detected in post-mortem examinations.<sup>47</sup> Another recent study found that veterinarians who turned  
16 to alcohol to cope with their work-related stress were more likely to have suicidal thoughts.<sup>10</sup>  
17  
18  
19

20  
21 There was no significant effect on serious suicidal thoughts regarding the main field of work, neither  
22 in the univariate nor in the adjusted model. Subsequently, all job stress factors were significantly  
23 associated with serious suicidal thoughts in the univariate model, but not in the adjusted model.  
24 However, in the additional analyses, the use of alcohol to cope with tension and all three job stress  
25 factors remained significant before entering reality weakness and mental distress in the model.  
26 Although previous studies have suggested that work-related stress influences suicide risk in  
27 veterinarians,<sup>48</sup> longitudinal research design may further elaborate on the role of mediating and  
28 confounding effects. The findings of *emotional demands*, *work/life balance*, and *fear of*  
29 *complaints/criticism* as important job stress factors concur with previous research. It has been  
30 suggested that work conditions that are emotionally exhausting for veterinarians may foster suicidal  
31 thoughts,<sup>10</sup> and that poor work/life balance contributes to suicidal behavior.<sup>8</sup> Moreover, the fear of  
32 complaints or litigation has been reported as one of the greatest contributors to stress for  
33 veterinarians in a previous study.<sup>49</sup>  
34  
35  
36  
37  
38  
39  
40  
41  
42  
43

44 Contrary to previous research,<sup>18,26,27</sup> the personality trait, reality weakness, was not significant in the  
45 adjusted model. This may be explained by the high correlation between mental distress and reality  
46 weakness. The significance of mental distress on suicidal thoughts was high, with nearly three times  
47 increased odds for each step on the item scale. The importance of mental distress, anxiety  
48 symptoms, and depressive symptoms with respect to suicidal ideation is consistent with other  
49 research, both among medical doctors and others.<sup>15,17</sup>  
50  
51  
52  
53  
54  
55  
56  
57  
58  
59  
60

### Strengths and limitations

To our knowledge, this is the only nationwide study of suicidal behavior in veterinarians, incorporating all authorized veterinarians, in all main fields of work. A major strength was the high response rate (75 %), making multivariate analyses feasible, and reducing the effect of selection and response biases. Additionally, the questionnaire was quite extensive, allowing the use of a comprehensive predictor model and controlling for several variables. An important limitation is the cross-sectional design, which restricts conclusions about causality. The generalizability of the results may also be limited due to differences in the organization of work life, including workload, in other countries. Nevertheless, we believe the findings are representative of veterinarians in Northern Europe. The study was conducted during the coronavirus-pandemic of 2019 (Covid-19), which may have affected the results. The survey was planned before the pandemic, and any potential effects of Covid-19 (e.g., redundancy, and economic effects in the practices) were not accounted for.

### CONCLUSION

In summary, the level of suicidal behavior among veterinarians in Norway is relatively high, and both individual and work-related factors contribute to serious suicidal thoughts. In the multivariate analyses, the individual factors, and particularly mental distress, played a more important role than the work-related factors, while veterinarians themselves regarded work problems as the most contributing factor to their suicidal thoughts. The roles of gender and specific work-related factors should be further investigated to better understand the complexity of suicidal behavior among veterinarians.

### ACKNOWLEDGMENTS

We would like to express our gratitude to the Norwegian Veterinary Association, including The Small Animal Veterinary Association, The Aquaculture Veterinary Association, and Oslo & Akershus Veterinary Association, as well as MSD Animal Health, for their financial support, making it possible to collect data for this study. Professors Magne Thoresen and Torbjørn Moum have made substantial input to the statistical analyses.

## **AUTHOR'S CONTRIBUTION TO THE MANUSCRIPT**

HSD, RT, and EH designed the study and analyzed the data. HSD wrote the first draft of the manuscript. All authors revised the manuscript and approved the final version of the manuscript. The corresponding author attests that all listed authors meet authorship criteria and that no others meeting the criteria have been omitted. HSD and EH acts as a guarantor.

## **DATA AVAILABILITY STATEMENT**

Data are available upon reasonable request.

## **COMPETING INTERESTS STATEMENT**

None declared.

## **FIGURE LEGENDS**

Figure 1: Age distribution according to gender.

## **FUNDING STATEMENT**

This work was funded by the Institute of Basic Medical Sciences, Faculty of Medicine at the University of Oslo as an internal Ph.D. fellowship and financially supported by the Norwegian Veterinary Association, including the Small Animal Veterinary Association, the Aquaculture Veterinary Association and Oslo and Akershus Veterinary Association, and MSD Animal Health. The sponsors had no role in the collection, analysis, and interpretation of data, in the writing of the report, and in the decision to submit the paper for publication. The authors had full access to all the data in this study and take complete responsibility for the integrity of the data and the accuracy of the data analyses.

## REFERENCES

1. Platt B, Hawton K, Simkin S, et al. Systematic review of the prevalence of suicide in veterinary surgeons. *Occup Med (Lond)* 2010;60:436-46. doi: 10.1093/occmed/kqq044
2. Milner AJ, Niven H, Page K, et al. Suicide in veterinarians and veterinary nurses in Australia: 2001-2012. *Aust Vet J* 2015;93:308-10. doi: 10.1111/avj.12358
3. Tomasi SE, Fechter-Leggett ED, Edwards NT, et al. Suicide among veterinarians in the United States from 1979 through 2015. *J Am Vet Med Assoc* 2019;254:104-12. doi: 10.2460/javma.254.1.104
4. Witte TK, Spitzer EG, Edwards N, et al. Suicides and deaths of undetermined intent among veterinary professionals from 2003 through 2014. *J Am Vet Med Assoc* 2019;255:595-608. doi: 10.2460/javma.255.5.595
5. Perret JL, Best CO, Coe JB, et al. Prevalence of mental health outcomes among Canadian veterinarians. *J Am Vet Med Assoc* 2020;256:365-75. doi: 10.2460/javma.256.3.365
6. Schwerdtfeger KA, Bahramsoltani M, Spangenberg L, et al. Depression, suicidal ideation and suicide risk in German veterinarians compared with the general German population. *Vet Rec* 2020;186:e2. doi: 10.1136/vr.105430
7. Nett RJ, Witte TK, Holzbauer SM, et al. Risk factors for suicide, attitudes toward mental illness, and practice-related stressors among US veterinarians. *J Am Vet Med Assoc* 2015;247:945-55. doi: 10.2460/javma.247.8.945
8. Platt B, Hawton K, Simkin S, et al. Suicidal behaviour and psychosocial problems in veterinary surgeons: a systematic review. *Soc Psychiatry Psychiatr Epidemiol* 2012;47:223-40. doi: 10.1007/s00127-010-0328-6
9. Platt B, Hawton K, Simkin S, et al. Suicidality in the veterinary profession: interview study of veterinarians with a history of suicidal ideation or behavior. *Crisis* 2012;33:280-9. doi: 10.1027/0227-5910/a000143
10. Wallace JE. Burnout, coping and suicidal ideation: an application and extension of the job demand-control-support model. *J Workplace Behav Health* 2017;32:99-118. doi: 10.1080/15555240.2017.1329628
11. Dow MQ, Chur-Hansen A, Hamood W, et al. Impact of dealing with bereaved clients on the psychological wellbeing of veterinarians. *Aust Vet J* 2019;97:382-89. doi: 10.1111/avj.12842
12. Waters D, Barnhart G, Cowan J, et al. Attachment loss and trauma: A descriptive phenomenological analysis of suicidality and depression in veterinarians. *Psychol Trauma* 2019 doi: 10.1037/tra0000544
13. Whitnall VM, Simmonds JG. Occupational stress and coping strategies in experienced Australian veterinarians. *Vet Rec* 2021:e202. doi: 10.1002/vetr.202
14. Hem E, Grønvold NT, Aasland OG, et al. The prevalence of suicidal ideation and suicidal attempts among Norwegian physicians. Results from a cross-sectional survey of a nationwide sample. *Eur Psychiatry* 2000;15:183-9. doi: 10.1016/s0924-9338(00)00227-3
15. Tyssen R, Vaglum P, Grønvold NT, et al. Suicidal ideation among medical students and young physicians: a nationwide and prospective study of prevalence and predictors. *J Affect Disord* 2001;64:69-79. doi: 10.1016/s0165-0327(00)00205-6
16. Howarth EJ, O'Connor DB, Panagioti M, et al. Are stressful life events prospectively associated with increased suicidal ideation and behaviour? A systematic review and meta-analysis. *J Affect Disord* 2020;266:731-42. doi: 10.1016/j.jad.2020.01.171
17. Turecki G, Brent DA. Suicide and suicidal behaviour. *Lancet* 2016;387:1227-39. doi: 10.1016/s0140-6736(15)00234-2
18. Tyssen R, Hem E, Vaglum P, et al. The process of suicidal planning among medical doctors: predictors in a longitudinal Norwegian sample. *J Affect Disord* 2004;80:191-8. doi: 10.1016/s0165-0327(03)00091-0

19. O'Connor RC, Nock MK. The psychology of suicidal behaviour. *Lancet Psychiatry* 2014;1:73-85. doi: 10.1016/s2215-0366(14)70222-6
20. Reijula K, Räsänen K, Hämäläinen M, et al. Work environment and occupational health of Finnish veterinarians. *Am J Ind Med* 2003;44:46-57. doi: 10.1002/ajim.10228
21. Kersebohm JC, Lorenz T, Becher A, et al. Factors related to work and life satisfaction of veterinary practitioners in Germany. *Vet Rec Open* 2017;4:e000229. doi: 10.1136/vetreco-2017-000229
22. Allen LC. Feminisation: threat or opportunity? *Vet Rec* 2016;178:391-3. doi: 10.1136/vr.i2140
23. Hatch PH, Winefield HR, Christie BA, et al. Workplace stress, mental health, and burnout of veterinarians in Australia. *Aust Vet J* 2011;89:460-8. doi: 10.1111/j.1751-0813.2011.00833.x
24. Brezo J, Paris J, Turecki G. Personality traits as correlates of suicidal ideation, suicide attempts, and suicide completions: a systematic review. *Acta Psychiatr Scand* 2006;113:180-206. doi: 10.1111/j.1600-0447.2005.00702.x
25. Torgersen S, Alnæs R. Localizing DSM-III personality disorders in a three-dimensional structural space. *J Pers Disord* 1989;3:274-81. doi: 10.1521/pedi.1989.3.4.274
26. Berg AM, Hem E, Lau B, et al. Suicidal ideation and attempts in Norwegian police. *Suicide Life Threat Behav* 2003;33:302-12. doi: 10.1521/suli.33.3.302.23215
27. Sterud T, Hem E, Lau B, et al. Suicidal ideation and suicide attempts in a nationwide sample of operational Norwegian ambulance personnel. *J Occup Health* 2008;50:406-14. doi: 10.1539/joh.l8025
28. Blair A, Hayes HM, Jr. Cancer and other causes of death among U.S. veterinarians, 1966-1977. *Int J Cancer* 1980;25:181-5. doi: 10.1002/ijc.2910250203
29. Gardner DH, Hini D. Work-related stress in the veterinary profession in New Zealand. *N Z Vet J* 2006;54:119-24. doi: 10.1080/00480169.2006.36623
30. Paykel ES, Myers JK, Lindenthal JJ, et al. Suicidal feelings in the general population: a prevalence study. *Br J Psychiatry* 1974;124:460-9. doi: 10.1192/bjp.124.5.460
31. Rosta J, Aasland OG. Changes in the lifetime prevalence of suicidal feelings and thoughts among Norwegian doctors from 2000 to 2010: a longitudinal study based on national samples. *BMC Psychiatry* 2013;13:322. doi: 10.1186/1471-244x-13-322
32. Torgersen S. Hereditary-environmental differentiation of general neurotic, obsessive, and impulsive hysterical personality traits. *Acta Genet Med Gemellol (Roma)* 1980;29:193-207. doi: 10.1017/s0001566000007935
33. Tyssen R. Personality traits. In: Brower K, Riba M, eds. *Physician Mental Health and Well-Being: Research and Practice*. USA: Springer 2017:211-36.
34. Mahmood JI, Grotmol KS, Tesli M, et al. Life satisfaction in Norwegian medical doctors: a 15-year longitudinal study of work-related predictors. *BMC Health Serv Res* 2019;19:729. doi: 10.1186/s12913-019-4599-7
35. Derogatis L. *Administration, scoring and procedures manual*. 2nd ed. Baltimore, MD.: Procedures Psychometric Research, SCL-90-R 1983.
36. Tambs K, Moum T. How well can a few questionnaire items indicate anxiety and depression? *Acta Psychiatr Scand* 1993;87:364-7. doi: 10.1111/j.1600-0447.1993.tb03388.x
37. Ruud N, Løvseth LT, Rø KE, et al. Comparing mental distress and help-seeking among first-year medical students in Norway: results of two cross-sectional surveys 20 years apart. *BMJ Open* 2020;10:e036968. Doi:10.1136/bmjopen-2020-036968
38. Rø KE, Gude T, Tyssen R., et al. Counselling for burnout in Norwegian doctors: one year cohort study. *BMJ* 2008;337:a2004 doi:10.1136/bmj.a2004
39. Timmer SG, Verhoff J, Colten ME. Life stress, helplessness, and the use of alcohol and drugs to cope: an analysis of national survey data. In: Shiffman S, Wills TA, eds. *Coping and Substance Use*. Orlando, FL: Academic Press, 1985, 171-98.
40. Tyssen R, Vaglum P, Aasland OG, et al. Use of alcohol to cope with tension, and its relation to gender, years in medical school and hazardous drinking: a study of two nation-wide Norwegian samples of medical students. *Addiction* 1998;93:1341-9. doi: 10.1046/j.1360-0443.1998.93913415.x



- 1  
2  
3 41. Sterud T, Hem E, Ekeberg O, et al. Occupational stress and alcohol use: a study of two nationwide  
4 samples of operational police and ambulance, personnel in Norway. *J Stud Alcohol Drugs*  
5 2007;68:896-904. doi: 10.15288/jsad.2007.68.896  
6  
7 42. Mahmood JI, Støen Grotmol K, Tesli M, et al. Contextual Factors and Mental Distress as Possible  
8 Predictors of Hazardous Drinking in Norwegian Medical Doctors: A 15-Year Longitudinal,  
9 Nationwide Study. *Eur Addict Res* 2017;23:19-27. doi: 10.1159/000452442  
10  
11 43. Cooper CL, Rout U, Faragher B. Mental health, job satisfaction, and job stress among general  
12 practitioners. *BMJ* 1989;298:366-70.  
13  
14 44. Tysse R, Vaglum P, Grønvold NT et al. The impact of job stress and working conditions on mental  
15 health problems among junior house officers. A nationwide Norwegian prospective cohort  
16 study. *Med Educ* 2000;34:374-84.  
17  
18 45. Bartram DJ, Yadegarfar G, Baldwin DS. A cross-sectional study of mental health and well-being  
19 and their associations in the UK veterinary profession. *Soc Psychiatry Psychiatr Epidemiol*  
20 2009;44:1075-85. doi: 10.1007/s00127-009-0030-8  
21  
22 46. Harling M, Strehmel P, Schablon A, et al. Psychosocial stress, demoralization and the  
23 consumption of tobacco, alcohol and medical drugs by veterinarians. *J Occup Med Toxicol*  
24 2009;4:4. doi: 10.1186/1745-6673-4-4  
25  
26 47. Pilgrim JL, Dorward R, Drummer OH. Drug-caused deaths in Australian medical practitioners and  
27 health-care professionals. *Addiction* 2017;112:486-93. doi: 10.1111/add.13619  
28  
29 48. Bartram DJ, Baldwin DS. Veterinary surgeons and suicide: a structured review of possible  
30 influences on increased risk. *Vet Rec* 2010;166:388-97. doi: 10.1136/vr.b4794  
31  
32 49. Bartram DJ, Yadegarfar G, Baldwin DS. Psychosocial working conditions and work-related  
33 stressors among UK veterinary surgeons. *Occup Med (Lond)* 2009;59:334-41. doi:  
34 10.1093/occmed/kqp072  
35  
36  
37  
38  
39  
40  
41  
42  
43  
44  
45  
46  
47  
48  
49  
50  
51  
52  
53  
54  
55  
56  
57  
58  
59  
60

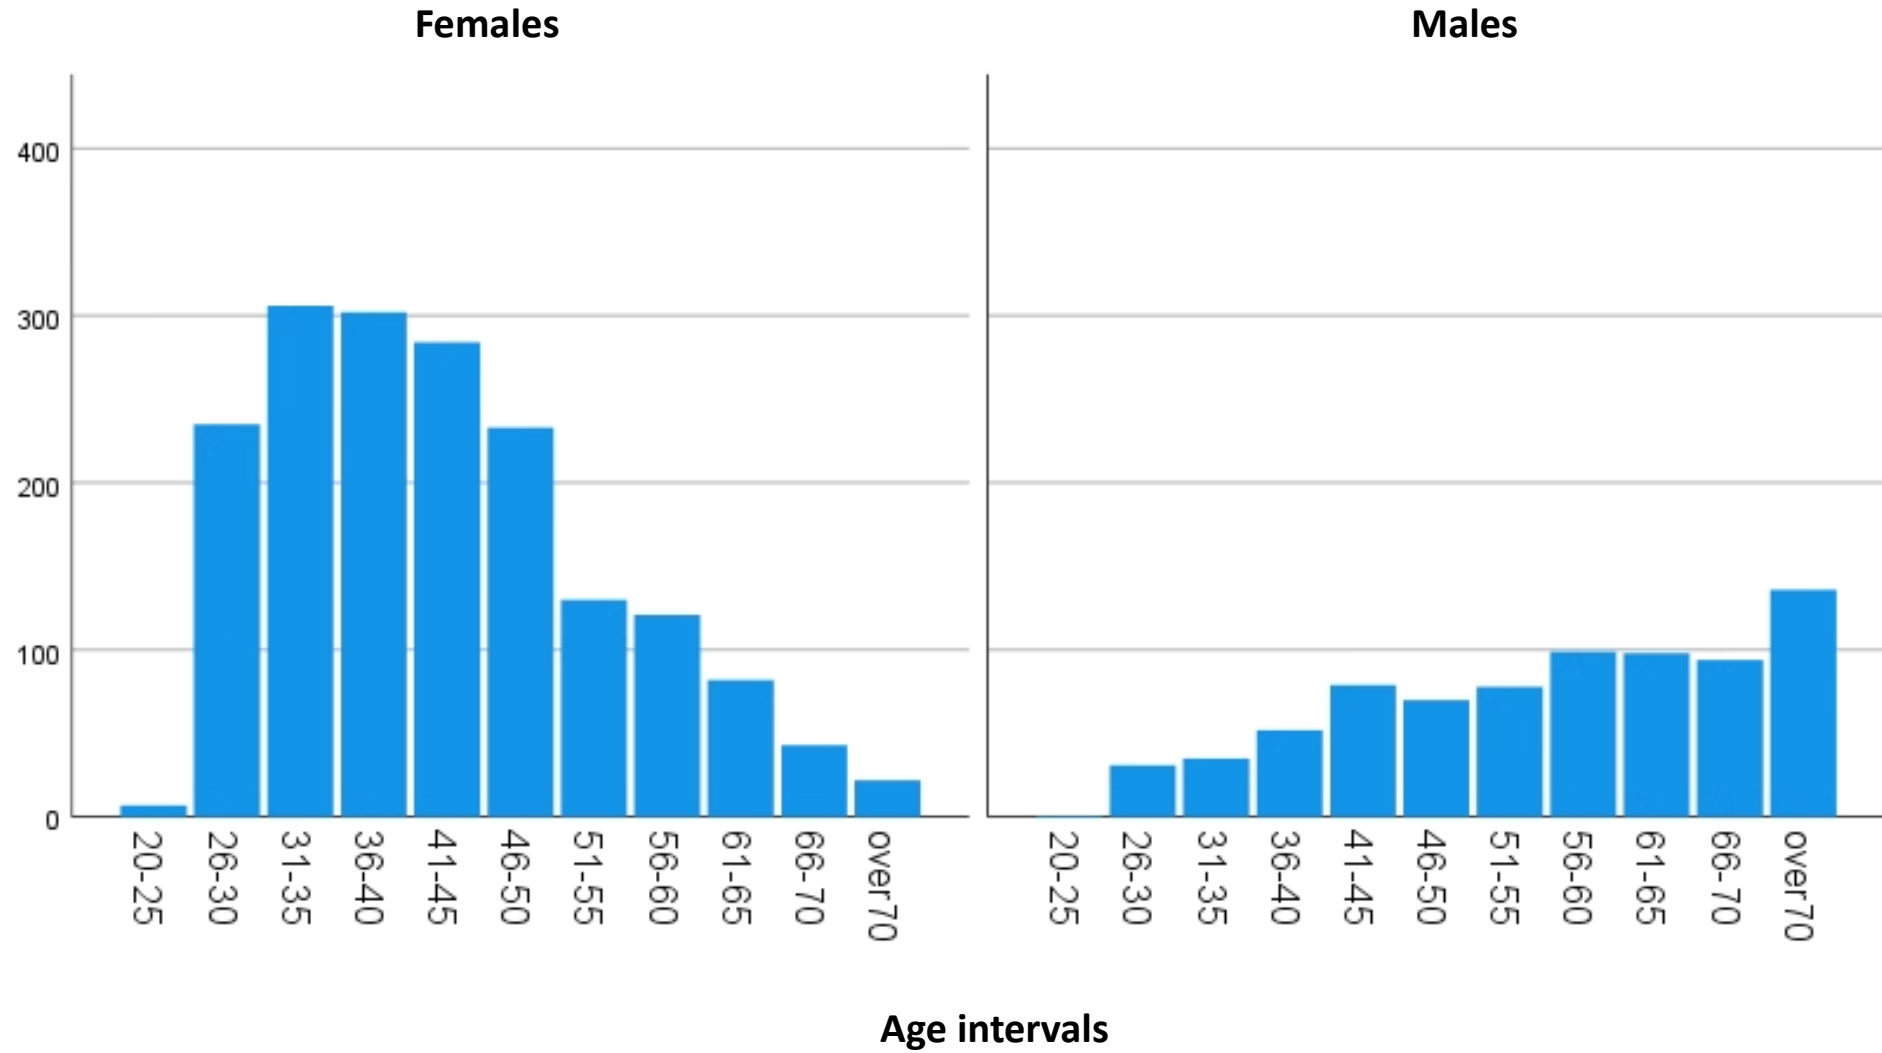

Gjerdrum, July 23<sup>rd</sup> 2021

1  
2  
3  
4  
5  
6  
7 Helene Seljenes Dalum  
8 Department of Behavioural Medicine  
9  
10 Institute of Basic Medical Sciences  
11  
12 Faculty of Medicine  
13  
14 University of Oslo  
15  
16 P.O. Box 1111 Blindern  
17  
18 NO-0317 Oslo  
19  
20 Norway  
21  
22

23 **To Editor-in-Chief Adrian Aldcroft**

24  
25 We hereby submit the article entitled "Suicidal behaviour in a nationwide cross-sectional study of  
26 veterinarians in Norway (The NORVET study): individual and work-related factors" to be considered  
27 for publication as original research in BMJ Open.  
28

29 Several studies have shown increased suicide rates in veterinarians, but less is known about  
30 factors contributing to suicidal behaviour in this profession. The present manuscript is the first based  
31 on a nationwide survey among veterinarians. An extensive questionnaire was distributed to all  
32 authorized veterinarians in Norway, and the response rate was exceptionally high (75%).  
33

34 The manuscript has not been considered for publication nor is it currently under  
35 consideration for publication by any other journal.  
36

37 The authors received no funding for preparing the manuscript. The authors declare that they  
38 have no competing interests. All authors have contributed to the manuscript and approved the final  
39 version submitted.  
40

41 We hope that this manuscript is of interest for BMJ Open, and we are looking forward to your  
42 response.  
43  
44

45  
46  
47 Sincerely yours,  
48

49  
50  
51 Helene Seljenes Dalum,  
52 On behalf of the authors  
53 University of Oslo  
54 E-mail: h.s.dalum@medisin.uio.no  
55 Phone number: +47 90648178  
56  
57  
58  
59  
60

**STROBE 2007 (v4) Statement—Checklist of items that should be included in reports of *cross-sectional studies***

| Section/Topic                | Item # | Recommendation                                                                                                                                                                       | Reported on page # |
|------------------------------|--------|--------------------------------------------------------------------------------------------------------------------------------------------------------------------------------------|--------------------|
| <b>Title and abstract</b>    | 1      | (a) Indicate the study's design with a commonly used term in the title or the abstract                                                                                               | 1                  |
|                              |        | (b) Provide in the abstract an informative and balanced summary of what was done and what was found                                                                                  | 3                  |
| <b>Introduction</b>          |        |                                                                                                                                                                                      |                    |
| Background/rationale         | 2      | Explain the scientific background and rationale for the investigation being reported                                                                                                 | 5                  |
| Objectives                   | 3      | State specific objectives, including any prespecified hypotheses                                                                                                                     | 6                  |
| <b>Methods</b>               |        |                                                                                                                                                                                      |                    |
| Study design                 | 4      | Present key elements of study design early in the paper                                                                                                                              | 6                  |
| Setting                      | 5      | Describe the setting, locations, and relevant dates, including periods of recruitment, exposure, follow-up, and data collection                                                      | 6                  |
| Participants                 | 6      | (a) Give the eligibility criteria, and the sources and methods of selection of participants                                                                                          | 6                  |
| Variables                    | 7      | Clearly define all outcomes, exposures, predictors, potential confounders, and effect modifiers. Give diagnostic criteria, if applicable                                             | 7-9                |
| Data sources/<br>measurement | 8*     | For each variable of interest, give sources of data and details of methods of assessment (measurement). Describe comparability of assessment methods if there is more than one group | 7-9                |
| Bias                         | 9      | Describe any efforts to address potential sources of bias                                                                                                                            | 6                  |
| Study size                   | 10     | Explain how the study size was arrived at                                                                                                                                            | 9                  |
| Quantitative variables       | 11     | Explain how quantitative variables were handled in the analyses. If applicable, describe which groupings were chosen and why                                                         | 7-9                |
| Statistical methods          | 12     | (a) Describe all statistical methods, including those used to control for confounding                                                                                                | 9                  |
|                              |        | (b) Describe any methods used to examine subgroups and interactions                                                                                                                  | 9                  |
|                              |        | (c) Explain how missing data were addressed                                                                                                                                          | 9                  |
|                              |        | (d) If applicable, describe analytical methods taking account of sampling strategy                                                                                                   | NA                 |
|                              |        | (e) Describe any sensitivity analyses                                                                                                                                                | NA                 |
| <b>Results</b>               |        |                                                                                                                                                                                      |                    |

|                          |     |                                                                                                                                                                                                              |       |
|--------------------------|-----|--------------------------------------------------------------------------------------------------------------------------------------------------------------------------------------------------------------|-------|
| Participants             | 13* | (a) Report numbers of individuals at each stage of study—eg numbers potentially eligible, examined for eligibility, confirmed eligible, included in the study, completing follow-up, and analysed            | NA    |
|                          |     | (b) Give reasons for non-participation at each stage                                                                                                                                                         | NA    |
|                          |     | (c) Consider use of a flow diagram                                                                                                                                                                           | NA    |
| Descriptive data         | 14* | (a) Give characteristics of study participants (eg demographic, clinical, social) and information on exposures and potential confounders                                                                     | 9-10  |
|                          |     | (b) Indicate number of participants with missing data for each variable of interest                                                                                                                          | 9-13  |
| Outcome data             | 15* | Report numbers of outcome events or summary measures                                                                                                                                                         | 9-13  |
| Main results             | 16  | (a) Give unadjusted estimates and, if applicable, confounder-adjusted estimates and their precision (eg, 95% confidence interval). Make clear which confounders were adjusted for and why they were included | 13    |
|                          |     | (b) Report category boundaries when continuous variables were categorized                                                                                                                                    | NA    |
|                          |     | (c) If relevant, consider translating estimates of relative risk into absolute risk for a meaningful time period                                                                                             | NA    |
| Other analyses           | 17  | Report other analyses done—eg analyses of subgroups and interactions, and sensitivity analyses                                                                                                               | 12    |
| <b>Discussion</b>        |     |                                                                                                                                                                                                              |       |
| Key results              | 18  | Summarise key results with reference to study objectives                                                                                                                                                     | 14    |
| Limitations              | 19  | Discuss limitations of the study, taking into account sources of potential bias or imprecision. Discuss both direction and magnitude of any potential bias                                                   | 16    |
| Interpretation           | 20  | Give a cautious overall interpretation of results considering objectives, limitations, multiplicity of analyses, results from similar studies, and other relevant evidence                                   | 14-16 |
| Generalisability         | 21  | Discuss the generalisability (external validity) of the study results                                                                                                                                        | 16    |
| <b>Other information</b> |     |                                                                                                                                                                                                              |       |
| Funding                  | 22  | Give the source of funding and the role of the funders for the present study and, if applicable, for the original study on which the present article is based                                                | 4     |

\*Give information separately for cases and controls in case-control studies and, if applicable, for exposed and unexposed groups in cohort and cross-sectional studies.

**Note:** An Explanation and Elaboration article discusses each checklist item and gives methodological background and published examples of transparent reporting. The STROBE checklist is best used in conjunction with this article (freely available on the Web sites of PLoS Medicine at <http://www.plosmedicine.org/>, Annals of Internal Medicine at <http://www.annals.org/>, and Epidemiology at <http://www.epidem.com/>). Information on the STROBE Initiative is available at [www.strobe-statement.org](http://www.strobe-statement.org).

# BMJ Open

**Prevalence and individual and work-related factors associated with suicidal thoughts and behaviors among veterinarians in Norway: a cross-sectional, nationwide survey-based study (the NORVET study)**

|                                 |                                                                                                                                                                                                                                                                                                                                                           |
|---------------------------------|-----------------------------------------------------------------------------------------------------------------------------------------------------------------------------------------------------------------------------------------------------------------------------------------------------------------------------------------------------------|
| Journal:                        | <i>BMJ Open</i>                                                                                                                                                                                                                                                                                                                                           |
| Manuscript ID                   | bmjopen-2021-055827.R1                                                                                                                                                                                                                                                                                                                                    |
| Article Type:                   | Original research                                                                                                                                                                                                                                                                                                                                         |
| Date Submitted by the Author:   | 11-Nov-2021                                                                                                                                                                                                                                                                                                                                               |
| Complete List of Authors:       | Dalum, Helene; University of Oslo Faculty of Medicine, Department of Behavioural Medicine<br>Tyssen, Reidar; University of Oslo Faculty of Medicine, Department of Behavioural Sciences in Medicine<br>Hem, Erlend; University of Oslo Faculty of Medicine, Dept of the Behavioural Sciences in Medicine; Institute for Studies of the Medical Profession |
| <b>Primary Subject Heading</b>: | Epidemiology                                                                                                                                                                                                                                                                                                                                              |
| Secondary Subject Heading:      | Mental health, Occupational and environmental medicine                                                                                                                                                                                                                                                                                                    |
| Keywords:                       | EPIDEMIOLOGY, MENTAL HEALTH, OCCUPATIONAL & INDUSTRIAL MEDICINE, Suicide & self-harm < PSYCHIATRY                                                                                                                                                                                                                                                         |
|                                 |                                                                                                                                                                                                                                                                                                                                                           |

SCHOLARONE™  
Manuscripts



I, the Submitting Author has the right to grant and does grant on behalf of all authors of the Work (as defined in the below author licence), an exclusive licence and/or a non-exclusive licence for contributions from authors who are: i) UK Crown employees; ii) where BMJ has agreed a CC-BY licence shall apply, and/or iii) in accordance with the terms applicable for US Federal Government officers or employees acting as part of their official duties; on a worldwide, perpetual, irrevocable, royalty-free basis to BMJ Publishing Group Ltd ("BMJ") its licensees and where the relevant Journal is co-owned by BMJ to the co-owners of the Journal, to publish the Work in this journal and any other BMJ products and to exploit all rights, as set out in our [licence](#).

The Submitting Author accepts and understands that any supply made under these terms is made by BMJ to the Submitting Author unless you are acting as an employee on behalf of your employer or a postgraduate student of an affiliated institution which is paying any applicable article publishing charge ("APC") for Open Access articles. Where the Submitting Author wishes to make the Work available on an Open Access basis (and intends to pay the relevant APC), the terms of reuse of such Open Access shall be governed by a Creative Commons licence – details of these licences and which [Creative Commons](#) licence will apply to this Work are set out in our licence referred to above.

Other than as permitted in any relevant BMJ Author's Self Archiving Policies, I confirm this Work has not been accepted for publication elsewhere, is not being considered for publication elsewhere and does not duplicate material already published. I confirm all authors consent to publication of this Work and authorise the granting of this licence.

1  
2  
3 1 **TITLE PAGE:**

4  
5 2 **TITLE**

6  
7 3 Prevalence and individual and work-related factors associated with suicidal thoughts and  
8  
9 4 behaviors among veterinarians in Norway: a cross-sectional, nationwide survey-based study  
10  
11 5 (the NORVET study)  
12  
13 6

14 7 **AUTHORS NAMES AND AFFILIATIONS**

15  
16 8 Helene Seljenes Dalum<sup>a</sup>, Reidar Tyssen<sup>a</sup>, Erlend Hem<sup>a, b</sup>.

17  
18 9  
19  
20 10 <sup>a</sup> Department of Behavioural Medicine, Institute of Basic Medical Sciences, Faculty of Medicine, University of  
21  
22 11 Oslo, Norway.

23 12 <sup>b</sup> Institute for Studies of the Medical Profession, Oslo, Norway.  
24  
25 13  
26  
27 14

28  
29 15 **CORRESPONDING AUTHOR**

30  
31  
32 16 Helene Seljenes Dalum  
33  
34 17  
35  
36 18

37 19 Department of Behavioural Medicine

38  
39 20 Institute of Basic Medical Sciences

40  
41 21 Faculty of Medicine

42  
43 22 University of Oslo

44  
45 23 P.O. Box 1111 Blindern

46  
47 24 NO-0317 Oslo

48  
49 25 Norway  
50  
51 26

52  
53 27 E-mail: [h.s.dalum@medisin.uio.no](mailto:h.s.dalum@medisin.uio.no)  
54  
55 28

56  
57 29 Word count: 4041 (excluding title page, abstract, tables and figures, acknowledgements, and  
58  
59 30 references)  
60  
61 31



## 1 **ABSTRACT**

2 Objectives: Several studies have shown increased suicide rates among veterinarians. We investigated  
3 the self-reported prevalence of suicidal thoughts and behaviors and contributing and independent  
4 factors associated with suicidal thoughts and behaviors among veterinarians in Norway.

5 Design: Cross-sectional, nationwide survey.

6 Participants: 2596 veterinarians in Norway (response rate: 75 %).

7 Main outcome measure: Paykel's five-item questionnaire.

8 Results: In total, 27 % (n=682/2657) of veterinarians in Norway felt that life was not worth living  
9 during the last year, 5 % (n=139/2562) had serious suicidal thoughts, and 0.2 % (n=6/2537) had  
10 attempted suicide. Female veterinarians reported significantly higher prevalence of suicidal feelings  
11 and thoughts than males. For serious suicidal thoughts, women had nearly twice the prevalence as  
12 their male colleagues (6.2 % (n=108/1754) vs. 3.6 % (n=28/766), chi-square 6.5, p=0.011).  
13 Independent factors associated with serious suicidal thoughts were being single (OR = 1.76, 95 %CI  
14 1.13-2.72, p<0.05), negative life events (OR = 1.43, 95 %CI 1.22-1.68, p<0.001), and the presence of  
15 mental distress (OR = 2.75, 95 %CI 2.14-3.52, p<0.001). The veterinarians related their serious  
16 suicidal thoughts to work and personal problems, and a lesser degree to family, social, and other  
17 problems. Nearly twice as many women (53 %, n=57/108) as men (28 %, n=7/25) reported work  
18 problems as the most important contributing factor to their serious suicidal thoughts (chi-square:  
19 4.99, p=0.03). 4 % (n=6/139) reported work problems as the only factor of importance.

20  
21 Conclusions: Veterinarians in Norway have relatively high prevalence of suicidal feelings and  
22 thoughts, including serious suicidal thoughts. In multivariable analyses, the individual factors were  
23 more important than work-related ones, while work problems were the most reported contributing  
24 factor to serious suicidal thoughts by the veterinarians themselves. The role of gender and specific  
25 work-related factors should be further investigated to better understand the complexity of suicidal  
26 behavior among veterinarians.

27  
28 Keywords: Veterinarians – suicidal behavior – mental distress – personality traits –  
29  
30

1  
2  
3 1 **Strengths and limitations of this study**  
4

- 5  
6 2 • Strengths of our study is the high response rate (75 %), in a nationwide study of suicidal  
7 3 behavior in veterinarians, in all main fields of work.  
8  
9 4 • An extensive questionnaire was used, making multivariable analysis feasible.  
10  
11 5 • This is a cross-sectional study, which limits any conclusions regarding causality.  
12  
13 6 • The study possibly has limited generalizability, due to differences in organization of work life  
14 7 in other countries.  
15  
16  
17 8  
18  
19 9  
20  
21  
22 10  
23  
24 11  
25  
26  
27 12  
28  
29 13  
30  
31  
32 14  
33  
34 15  
35  
36  
37 16  
38  
39 17  
40  
41  
42 18  
43  
44  
45  
46  
47  
48  
49  
50  
51  
52  
53  
54  
55  
56  
57  
58  
59  
60

For peer review only

## 1 INTRODUCTION

2 Several studies have shown increased suicide rates among veterinarians. A review from 2010 found  
3 elevated suicide rates in all but one of the 15 studies published at the time.<sup>1</sup> Recent studies have also  
4 indicated increased suicide rates in the profession.<sup>2-4</sup> Furthermore, three recent studies found a  
5 higher prevalence of suicidal ideation among veterinarians than the general population.<sup>5-7</sup>

6 There is little knowledge about the contribution of individual and work-related factors to suicidal  
7 behavior in veterinarians. In a systematic review from 2012, which included 52 papers, the authors  
8 highlighted the paucity of research that investigated the factors that contribute to suicide among  
9 veterinarians, and that many of the studies were of poor quality.<sup>8</sup> An interview study found that  
10 patient issues, responsibility, and poor work/life balance contributed to suicidal behavior among  
11 veterinarians.<sup>9</sup> It has been suggested that suicidal ideation among veterinarians is linked to the  
12 demanding nature of their work.<sup>10</sup> Dealing with bereaved clients (i.e. animal owners) has been shown  
13 to impact the mental health of veterinarians,<sup>11</sup> and attachment loss and trauma can contribute to  
14 both depression and suicidality.<sup>12</sup> Preoccupation, self-doubt, conflicting responsibilities (care of  
15 animals/human clients/financial demands), and insufficient support were important factors of job  
16 stress among veterinarians in a qualitative study.<sup>13</sup> When searching for independent work-related  
17 factors associated with suicidal behavior, it is important to control for known individual factors.  
18 These include having no partner,<sup>14 15</sup> negative life events,<sup>16</sup> anxiety symptoms, depressive  
19 symptoms,<sup>15 17</sup> personality problems,<sup>18 19</sup> and the problematic use of alcohol.<sup>17</sup>

20 The gender balance among veterinarians has changed significantly over the past decades, from 66 %  
21 male veterinary students in Norway in 1980 to only 16 % in 2020 (personal communication, Ann  
22 Kristin Egeli, and Norwegian University of Life Sciences, June 22<sup>nd</sup>, 2021). As of June 2021, 69 % of  
23 veterinarians holding authorization in Norway were women (personal communication, Bente N.  
24 Reve, and The Norwegian Food Safety Authority, July 12<sup>th</sup>, 2021). The gender shift in the profession  
25 corresponds to that in several other countries.<sup>20-22</sup> Studies have shown that being female and of  
26 younger age increases the risk of serious psychological distress as a veterinarian.<sup>7 8 11</sup> The prevalence  
27 of psychological distress, such as anxiety symptoms and depressive symptoms, is also higher among  
28 female veterinarians compared to that among male veterinarians.<sup>5 11 23</sup>

29 Furthermore, there is substantial evidence that certain personality traits may increase the risk of  
30 suicide.<sup>19 24</sup> Reality weakness is a deviant personality trait including chronic illusions, paranoid traits,  
31 identity-insecurity, and relational problems.<sup>25</sup> This trait has demonstrated predictive validity in  
32 Norwegian medical doctors regarding the aggravation of suicidal ideation.<sup>18</sup> It is a significant  
33 predictor of serious suicidal ideation in other occupational groups as well.<sup>26 27</sup>

1  
2  
3 1 Over the last decades, the veterinary profession has turned from agriculture and food-producing  
4 2 animal medicine to an increasing proportion working with companion animals. Two US studies have  
5 3 found a higher suicide rate among companion animal practitioners compared to other  
6 4 specializations,<sup>3,28</sup> and it has been shown that veterinarians in this field more often reported suicidal  
7 5 thoughts than other veterinarians.<sup>29</sup> Thus, attention is required in the different fields of veterinary  
8 6 medicine.

9 7 Few studies have investigated the direct association and contribution of individual and work-related  
10 8 factors to suicidal thoughts and behavior. Therefore, we investigated the following questions:

- 11 9 (1) What is the prevalence of suicidal thoughts and behavior among veterinarians in Norway, and are  
12 10 there any gender differences?  
13 11 (2) What do veterinarians in Norway regard as contributing factors to their serious suicidal thoughts?  
14 12 (3) What are the independent individual and work-related predictors for serious suicidal thoughts?  
15 13

## 16 14 **METHODS**

### 17 15 **Sample**

18 16 The sample included all veterinarians in Norway, holding valid authorization as of May 2020 (n = 4256),  
19 17 according to information retrieved from the Norwegian Food Safety Authority. We excluded  
20 18 veterinarians for the following reasons: no residential address in Norway (n = 527), current address  
21 19 unknown (n = 196), those working abroad (n = 62) and those who were deceased (n = 7). This resulted  
22 20 in an eligible sample of 3464 veterinarians.  
23 21

### 24 22 **Questionnaire**

25 23 A questionnaire of 12 pages, an information sheet and a reply-paid envelope were distributed by  
26 24 surface mail in November 2020. The information sheet included contact information to a psychiatrist  
27 25 in the research group and the colleague-support of the Norwegian Veterinary Association. Two  
28 26 reminders were sent in January and February 2021, respectively. Five gift cards from a sports shop  
29 27 were placed in a drawing for respondents as incentives to increase the response rate. An external  
30 28 company managed both the data collection and prize awards. Respondents returned their  
31 29 questionnaires in a sealed envelope, and the identities of the respondents were unknown to the  
32 30 researchers throughout. The complete questionnaire in Norwegian can be found as a supplementary  
33 31 file ("Supplementary file 1 – Full questionnaire NORVET.pdf").  
34 32  
35 33  
36 34  
37 35  
38 36  
39 37  
40 38  
41 39  
42 40  
43 41  
44 42  
45 43  
46 44  
47 45  
48 46  
49 47  
50 48  
51 49  
52 50  
53 51  
54 52  
55 53  
56 54  
57 55  
58 56  
59 57  
60 58

1  
2  
3 1 The Regional Committee for Medical and Health Research Ethics South-East C (132704), and the  
4  
5 2 Norwegian Centre for Research Data (674793) approved this study.  
6  
7 3  
8  
9

#### 4 **Instruments – dependent variable**

11  
12 5 Paykel's questionnaire about suicidal thoughts and attempts was the dependent variable in this  
13  
14 6 study.<sup>30</sup> It is a five-item instrument developed to study suicidal feelings in the general population.  
15  
16 7 The items represent increasing severity, from unspecific suicidal feelings to actual suicide attempt.  
17  
18 8 Previous studies on several professions in Norway have validated this instrument.<sup>14 15 26 27 31</sup> The five  
19  
20 9 items have the following wording: 1. 'Have you ever felt that life was not worth living?'  
21  
22 10 2. 'Have you ever wished you were dead – for instance, that you could go to sleep and not wake up?'  
23  
24 11 3. 'Have you ever thought of taking your life, even if you would not really do it?' 4. 'Have you ever  
25  
26 12 reached the point where you seriously considered taking your life, or perhaps made plans how you  
27  
28 13 would go about doing it?' 5. 'Have you ever made an attempt to take your life?' Question four was  
29  
30 14 slightly altered in the Norwegian translation, to: "... and even made plans...", reinforcing the  
31  
32 15 seriousness in this statement.<sup>15</sup> The responses to each question were never, hardly ever, sometimes  
33  
34 16 or often. Responses were dichotomized into never (0) and any frequency (1) according to Paykel's  
35  
36 17 original work. The preceding year's suicidal thoughts and attempts were investigated in the present  
37  
38 18 study. For questions 4. and 5., an additional question was asked: 'To what extent do you think the  
39  
40 19 following factors contributed to your consideration of taking your life', with the following factors: 1.  
41  
42 20 Personal problems, 2. Family problems, 3. Social problems, 4. Work problems, 5. Other problems.  
43  
44 21 Each of the factors had five response categories from 'not at all' (1) to 'very much' (5).  
45  
46 22

#### 23 **Independent variables – individual factors**

47  
48 24 The personality trait *reality weakness* was measured using the nine-item reality weakness dimension  
49  
50 25 of Torgersen's Basic Character Inventory (BCI).<sup>32</sup> Each item had a dichotomous ('agree'/'do not  
51  
52 26 agree') response, with a total sum score from 0 to 9. BCI-Reality weakness is an original, deviant trait  
53  
54 27 related to perceptions and ideations on the borderline between reality and fantasy; this dimension  
55  
56 28 also measures chronic illusions, paranoid traits, and traits related to severe personality disorders.<sup>25 33</sup>  
57  
58 29 Examples of items are 'I feel lonely most of the time' and 'Sometimes I feel I am not myself'. This  
59  
60 30 measure has previously been validated to predict emotional disturbance, such as serious suicidal  
31  
32 thoughts, severe depression, and lack of help-seeking among physicians.<sup>33</sup>

1  
2  
3 1 The Norwegian Centre for Research Data claimed the use of age intervals to keep the data as  
4  
5 2 unidentifiable as possible. Therefore, *age* was reported in the following intervals: 20-25, 26-30 (...) up  
6  
7 3 to 66-70 and >70 years. In this study, *marital status* was dichotomized into married/cohabitant and  
8  
9 4 single/divorced/separated/widow(er) (coded 0 and 1, respectively).

10  
11 5 *Life events during the last 12 months* were measured by 17 items, previously used by among others,  
12  
13 6 Tyssen et al.,<sup>15 34</sup> and adapted to veterinarians. The adaptations were mainly linguistic and included  
14  
15 7 the removal of items specific to physicians. Examples of life events were 'serious disease or accident',  
16  
17 8 'death of a relative/close friend' and 'serious economical problems'. All items were coded as 0 or 1,  
18  
19 9 and the variable comprised the sum score of all items. To test the effects on serious suicidal  
20  
21 10 thoughts, we used the weighted total score of all items significantly associated with such thoughts.

22  
23 11 *Mental distress (anxiety symptoms and depressive symptoms)* in the last 14 days was measured using  
24  
25 12 SCL-5, a five-item version of the Symptom Check List-25.<sup>35</sup> This five-item version is based on a factor  
26  
27 13 analysis by Tambs and Moum,<sup>36</sup> and contains questions about how much one is bothered by the  
28  
29 14 following: 1. 'Feeling fearful', 2. 'Nervousness or shakiness inside', 3. 'Feeling hopeless about the  
30  
31 15 future', 4. 'Feeling blue', 5. 'Worrying too much about things'. Each item was measured on a scale  
32  
33 16 from 1 to 5 from 'not at all' to 'very much'. The sum score is used to indicate the level of mental  
34  
35 17 distress. This version has been validated in medical students and physicians in Norway.<sup>37 38</sup>

36  
37 18 *Alcohol to cope* was measured by a single item originally used in national surveys in the USA.<sup>39</sup> The  
38  
39 19 item is: 'When you feel worried, tense, or nervous, do you ever drink alcoholic beverages to help you  
40  
41 20 handle things?' The alternatives were 'never', 'seldom', 'now and then' and 'often'. In the analyses,  
42  
43 21 responses were dichotomized into 0 'Never' and 1 'Any frequency', as validated in previous  
44  
45 22 Norwegian studies.<sup>40-42</sup> The reason for dichotomizing the response was for cultural purposes and we  
46  
47 23 wanted a clear distinction between drinking to cope with tension or not, as accounted for in detail  
48  
49 24 elsewhere.<sup>40</sup>

## 25 26 **Independent variables – work-related factors**

27  
28 27 *The main fields of work* were reported as 'companion animal practice', 'production animal practice',  
29  
30 28 'mixed clinical practice', 'equine practice', 'aquaculture', 'public administration',  
31  
32 29 'academia/researcher', 'pensioners' and 'others'. Those who classified themselves as pensioners  
33  
34 30 were excluded from the logistic regression analyses, because work-related factors were included in  
35  
36 31 the model.

1  
2  
3 1 *Job stress* was measured by a modified version of Cooper's Job Stress Questionnaire,<sup>43 44</sup> with minor  
4 2 adaptations to veterinarians' work conditions. These adaptations were mainly linguistic, but some  
5 3 items specific to the veterinary profession were added (as 'cross pressure between economy/animal  
6 4 welfare/ethics'). The veterinarians were asked how much different situations/factors made them  
7 5 stressed, with the response alternatives being reported by a five-point Likert type rating scale  
8 6 ranging from no stress at all (1) to a source of extreme stress (5). A factor analysis (principal  
9 7 component with varimax rotation, including scree plot evaluation) identified three job stress factors:  
10 8 *emotional demands*, *work/life balance*, and *fear of complaints/criticism*. The first factor, *emotional*  
11 9 *demands* (Cronbach's alpha=0.87), contained six items: 1. 'Daily contact with dying and critically ill  
12 10 animals', 2. 'Taking care of terminally ill animals and their owners', 3. 'Taking care of suffering  
13 11 animals', 4. 'Requests about animals from friends and family', 5. 'Requests about animals from  
14 12 relatives', and 6. 'Emotional involvement with patients'. The second factor, *work/life balance*  
15 13 (Cronbach's alpha=0.86), consisted of five items: 1. 'Work affects family life', 2. 'Managing a balance  
16 14 between work and personal life', 3. 'Work affects social life', 4. 'Time pressure', and 5. 'Interruptions  
17 15 and nagging at work'. The third factor, *fear of complaints/criticism* (Cronbach's alpha=0.88),  
18 16 consisted of three items: 1. 'Worries about complaints from animal owners/customers', 2. 'Animal  
19 17 owners/customers do not appreciate your work', and 3. 'Dealing with challenging animal  
20 18 owners/customers'.

## 20 **Statistical analysis**

21 SPSS version 27 and StataSE 16 were used for the statistical analyses. Table analyses and the  $\chi^2$  test  
22 22 were used to test for differences in categorical variables. Controlled effects were reported as odds  
23 23 ratios, analyzed through hierarchical logistic regression. The following variables were used as  
24 24 predictors of serious suicidal thoughts: gender, age, civil status, negative life events, mental distress,  
25 25 reality weakness, use of alcohol to cope, main field of work, and job stress. Initially all independent  
26 26 variables were analyzed bivariately with the dependent variable (crude ORs). In the adjusted model,  
27 27 all independent variables were entered simultaneously in a logistic regression (adjusted ORs). In  
28 28 order to study possible mediating or confounding effects of mental distress and reality weakness, we  
29 29 performed an additional multiple regression with leaving out the variables mental distress and reality  
30 30 weakness. The level of significance was set at 5 % ( $p < 0.05$ ). To investigate gender-specific effects, we  
31 31 entered two-way interaction terms between gender and the other independent variables in separate  
32 32 analyses with the main effect included in the equations. Missing values were coded as 'system  
33 33 missing'.

## 1 Patient and Public Involvement

2 The Norwegian Veterinary Association appointed a reference group for this project consisting of  
 3 seven veterinarians from each of the professional subgroups: Small Animal-, Equine-, Production  
 4 Animal and Aquaculture Veterinary Association, and the Association of Veterinarians in Public Health  
 5 Medicine, the Veterinary Students' association and the Pensioners' Association. These veterinarians  
 6 contributed with valuable input both to the design of the questionnaire, hypotheses, and aims of the  
 7 present study.

## 9 RESULTS

### 10 Demographics

11 Of the 3464 eligible participants, we received 2596 responses, resulting in a response rate of 75 %.

12 The most frequently reported age category was 41 – 45 years of age. The age varied between  
 13 genders, with a higher proportion of younger women, and the majority of men were older than 50  
 14 years. In total, 69 % were female and 31 % male (Table 1), which is an accurate reflection of the  
 15 actual gender distribution of veterinarians in Norway. Descriptive statistics for the veterinarians with  
 16 serious suicidal thoughts is included as a supplementary file (Supplementary File 2 – Descriptives for  
 17 veterinarians with serious suicidal thoughts).

19 Table 1 – Description of sample

| Variable      | Range of values | Frequency (%) | Mean (SD) |
|---------------|-----------------|---------------|-----------|
| <b>Gender</b> |                 |               |           |
| Female        |                 | 1776 (69.6 %) |           |
| Male          |                 | 776 (30.4 %)  |           |
| <b>Age</b>    |                 |               |           |
| 20-30         |                 | 274 (10.8 %)  |           |
| 31-40         |                 | 697 (27.4 %)  |           |
| 41-50         |                 | 667 (26.2 %)  |           |



|                           |                            |     |              |             |
|---------------------------|----------------------------|-----|--------------|-------------|
|                           | 51-60                      |     | 432 (16.9 %) |             |
|                           | 61-70                      |     | 318 (12.5 %) |             |
|                           | >70                        |     | 159 (6.2 %)  |             |
| <b>Marital status</b>     |                            |     |              |             |
|                           | Married/cohabiting         |     | 1962 (78 %)  |             |
|                           | Single/divorced/widow(er)  |     | 552 (22 %)   |             |
| <b>Life events</b>        | 0-9                        |     |              | 0.54 (0.89) |
| <b>SCL-5</b>              | 1-5                        |     |              | 2.00 (0.98) |
| <b>Reality weakness</b>   | 0-9                        |     |              | 1.38 (1.85) |
| <b>Alcohol to cope</b>    |                            |     |              |             |
|                           | Never                      |     | 1769 (71 %)  |             |
|                           | Any frequency              |     | 722 (29 %)   |             |
| <b>Main field of work</b> |                            |     |              |             |
|                           | Companion animal practice  |     | 802 (31.8 %) |             |
|                           | Public administration      |     | 402 (15.9 %) |             |
|                           | Mixed clinical practice    |     | 268 (10.6 %) |             |
|                           | Academia/research          |     | 202 (8.0 %)  |             |
|                           | Production animal practice |     | 177 (7.0 %)  |             |
|                           | Aquaculture                |     | 121 (4.8 %)  |             |
|                           | Equine practice            |     | 102 (4.0 %)  |             |
|                           | Other                      |     | 250 (9.9 %)  |             |
|                           | Pensioner                  |     | 198 (7.9 %)  |             |
| <b>Job stress</b>         |                            |     |              |             |
|                           | Emotional demands          | 1-5 |              | 1.98 (0.79) |
|                           | Work/life-balance          | 1-5 |              | 2.67 (0.97) |
|                           | Fear of complaints         | 1-5 |              | 3.06 (1.17) |

|                                                            |  |               |  |
|------------------------------------------------------------|--|---------------|--|
| <b>Connection to work-life</b>                             |  |               |  |
| Employed                                                   |  | 1561 (63.0 %) |  |
| Self-employed                                              |  | 573 (23.1 %)  |  |
| Other                                                      |  | 217 (8.8 %)   |  |
| Two or more connections to work life                       |  | 127 (5.1 %)   |  |
| <b>Position type</b>                                       |  |               |  |
| Permanent position                                         |  | 2023 (88.1 %) |  |
| Temporary position                                         |  | 70 (3 %)      |  |
| Temporary educational position                             |  | 50 (2.2 %)    |  |
| Other                                                      |  | 153 (6.7 %)   |  |
| <b>Working full-time</b>                                   |  | 1922 (81.1 %) |  |
| <b>Frequency of working overtime (weekly or bi-weekly)</b> |  | 1550 (67.9 %) |  |

### Prevalence of suicidal thoughts and behavior during the last year

27 % of the veterinarians reported that they felt that life was not worth living, 20 % had thought of suicide, even though they knew that they would not do it, 5 % reported that they had serious suicidal thoughts, and six persons (0.2 %) had attempted suicide (Table 2). Female veterinarians reported significantly higher prevalence of suicidal feelings and thoughts than male colleagues. This gender difference remained throughout all items; for serious suicidal thoughts; women had nearly twice the prevalence as their male colleagues (6.2 % vs. 3.6 %, chi-square: 6.5,  $p=0.011$ ).

1  
2  
3 1 Table 2 – Prevalence of suicidal feelings and thoughts among veterinarians in Norway according to  
4  
5 2 gender  
6

| Item                                     | All          | Men         | Women       | Total n<br>for each<br>item | $\chi^2$ and p-<br>value |
|------------------------------------------|--------------|-------------|-------------|-----------------------------|--------------------------|
| 1. Felt life was not worth living        | 682 (26.6 %) | 148 (19.3%) | 522 (29.7%) | 2567                        | 29.4,<br>p<0.001         |
| 2. Wished you were dead                  | 498 (19.4 %) | 96 (12.5%)  | 394 (22.5%) | 2565                        | 33.6,<br>p<0.001         |
| 3. Thoughts of taking life               | 503 (19.6 %) | 102 (13.3%) | 391 (22.3%) | 2565                        | 26.9,<br>p<0.001         |
| 4. Seriously considered taking your life | 139 (5.4 %)  | 28 (3.6%)   | 108 (6.2%)  | 2562                        | 6.5,<br>p=0.011          |
| 5. Made a suicide attempt                | 6 (0.2 %)    | 1 (0.1%)    | 5 (0.3%)    | 2537                        | NA                       |

3 Not all veterinarians reported gender (n=2554). This leads to a difference in total sum for men + women compared to "all."  
4  
5

### 6 **Self-reported factors contributing to serious suicidal thoughts**

7 Among the veterinarians reporting serious suicidal thoughts (n=139), work problems were the most  
8 frequently reported contributing factor (48 %), followed by personal problems (37 %) (Table 3). The  
9 only significant gender difference was regarding work problems, with nearly twice as many women  
10 (53 %) as men (28 %) reporting work problems as the most important contributing factor to their  
11 serious suicidal thoughts (chi-square: 4.99, p=0.03, Fisher's exact), and 4.3 % reported work problems  
12 as the only factor of importance.  
13  
14  
15

1 Table 3 - Contributing factors to serious suicidal thoughts among veterinarians in Norway

|                   | Not at all + A little + Somewhat |               |               | Quite a bit + Very much |              |               | Total n |
|-------------------|----------------------------------|---------------|---------------|-------------------------|--------------|---------------|---------|
|                   | N (%)                            |               |               | N (%)                   |              |               |         |
|                   | Total                            | Men           | Women         | Total                   | Men          | Women         |         |
| Personal problems | 84<br>(63.2%)                    | 17<br>(65.4%) | 67<br>(63.8%) | 49<br>(36.8%)           | 9<br>(34.6%) | 38<br>(36.2%) | 133     |
| Family problems   | 91<br>(68.4%)                    | 19<br>(79.2%) | 72<br>(67.9%) | 42<br>(31.6%)           | 5<br>(20.8%) | 34<br>(32.1%) | 133     |
| Social problems   | 108<br>(81.2%)                   | 21<br>(84.0%) | 86<br>(81.1%) | 25<br>(18.8%)           | 4<br>(16.0%) | 20<br>(18.9%) | 133     |
| Work problems     | 70<br>(51.9%)                    | 18<br>(72.0%) | 51<br>(47.2%) | 65<br>(48.1%)           | 7<br>(28.0%) | 57<br>(52.8%) | 135     |
| Other problems    | 90<br>(72.6%)                    | 20<br>(83.3%) | 70<br>(71.4%) | 34<br>(27.4%)           | 4<br>(16.7%) | 28<br>(28.6%) | 124     |

2 Item four of Paykel's questionnaire was answered by n= 2562 veterinarians (men=766, women=1754). The question was  
 3 answered positively by n=139 (see Table 1).

#### 5 **Multiple logistic regression of predictors of serious suicidal thoughts**

6 Being single, negative life events, mental distress, reality weakness, use of alcohol to cope, and the  
 7 three job stress factors were significant unadjusted (crude) predictors (Table 4). In the adjusted  
 8 model, the significant predictors were being single, negative life events, and mental distress. There  
 9 was no gender effect. No significant effect was found within the different fields of work or any of the  
 10 three job stress factors in the adjusted model (Table 4).

11 Post hoc, and in order to investigate any confounding or mediating effect of mental distress and  
 12 reality weakness on the job stress-variables, we conducted an additional multivariable analysis. This  
 13 was similar to the multivariable analysis in the previous sub-section, but without the variables *reality*  
 14 *weakness* and *mental distress*. When processing the individual and work-related factors without the  
 15 two variables of reality weakness and mental distress, the significant predictors were being single,

1 negative life events, use of alcohol to cope with tension, and all three job stress factors. The results  
 2 from the additional analysis can be found in the supplementary material (Supplementary File 3 –  
 3 Additional analysis predictor model).

4  
 5 Table 4 – Predictors of serious suicidal thoughts among veterinarians in Norway

|                                                                    | Crude   |                | Adjusted <sup>2</sup> |                |
|--------------------------------------------------------------------|---------|----------------|-----------------------|----------------|
|                                                                    | OR      | 95 % CI        | OR                    | 95 % CI        |
| Female                                                             | 1.55    | 0.999 to 2.401 | 0.88                  | 0.49 to 1.57   |
| Age                                                                | 0.93    | 0.86 to 1.00   | 1.11                  | 0.996 to 1.235 |
| Single                                                             | 2.38*** | 1.65 to 3.43   | 1.76*                 | 1.13 to 2.72   |
| Negative life events <sup>1</sup>                                  | 1.78*** | 1.55 to 2.04   | 1.43***               | 1.22 to 1.68   |
| SCL-5                                                              | 3.08*** | 2.61 to 3.64   | 2.75***               | 2.14 to 3.52   |
| Reality weakness <sup>3</sup>                                      | 1.47*** | 1.37 to 1.59   | 1.10                  | 0.99 to 1.22   |
| Alcohol to cope                                                    | 2.14*** | 1.51 to 3.04   | 1.09                  | 0.72 to 1.67   |
| <b>Main field of work (ref. category= mixed clinical practice)</b> |         |                |                       |                |
| Companion animals                                                  | 1.38    | 0.74 to 2.57   | 1.01                  | 0.50 to 2.06   |
| Production animals                                                 | 1.28    | 0.56 to 2.94   | 1.97                  | 0.77 to 5.05   |
| Equine practice                                                    | 1.21    | 0.45 to 3.28   | 1.02                  | 0.32 to 3.26   |
| Aquaculture                                                        | 1.01    | 0.37 to 2.73   | 1.07                  | 0.32 to 3.61   |
| Public administration                                              | 1.08    | 0.53 to 2.20   | 1.15                  | 0.49 to 2.71   |
| Academia/research                                                  | 1.12    | 0.49 to 2.56   | 1.07                  | 0.39 to 2.99   |
| Other                                                              | 0.82    | 0.35 to 1.91   | 0.70                  | 0.24 to 2.02   |
| <b>Job stress</b>                                                  |         |                |                       |                |
| Emotional demands                                                  | 1.12*** | 1.08-1.16      | 1.02                  | 0.97 to 1.07   |
| Work/life-balance                                                  | 1.13*** | 1.09-1.17      | 1.00                  | 0.95 to 1.05   |
| Fear of complaints                                                 | 1.18*** | 1.11-1.25      | 1.01                  | 0.93 to 1.09   |

<sup>1</sup>The variable life events was entered into the model as a weighted variable ('Negative life events'), comprising the sum score of life events that was significant in a univariate model with the dependent variable.

\*P<0.05

\*\*P<0.01

\*\*\*P<0.001

<sup>2</sup>In the adjusted model, all listed variables were adjusted for, i.e., gender, age, civil status, negative life events, SCL-5, reality weakness, use of alcohol to cope, main field of work and the three job stress factors.

<sup>3</sup>There was a high correlation between SCL-5 and reality weakness (Pearson's R=0.6).

We found significant interactions between gender and negative life events (OR=0.65, 95 % CI 0.46 – 0.92, p=0.015), with clearly steeper gradients for females. There was also an interaction between gender and work/life balance (OR=1.11, 95 %CI 1.01 – 1.22, p=0.026), and the increase in suicidal thoughts with higher work/life imbalance was stronger among males than among females. A figure illustrating the interaction analysis can be found as a Supplementary file (Supplementary file 4-1 and Supplementary File 4-2).

## 1 DISCUSSION

2 The main finding of this study was that more than one-fourth of the veterinarians in Norway felt that  
3 life was not worth living during the last year, 5 % had serious suicidal thoughts, and 0.2 % had  
4 attempted suicide. Female veterinarians reported significantly more suicidal feelings and thoughts  
5 than their male colleagues. The veterinarians considered their serious suicidal thoughts mainly as  
6 work and personal problems, and to a lesser degree, family, social, and other problems. Independent  
7 factors associated with serious suicidal thoughts were being single, negative life events, and mental  
8 distress.

9 Furthermore, veterinarians reported both suicidal feelings and serious suicidal thoughts more  
10 frequently (26.6 % and 5.4 %, respectively) than physicians (16.6 % and 2.6 %, respectively),<sup>14</sup> and  
11 police (8.9 % and 1.7 %, respectively)<sup>26</sup> in Norway. Furthermore, veterinarians, especially females,  
12 regarded work problems as the most important contributing factor to their suicidal thoughts. A  
13 previous study found that physicians most frequently regarded personal and family problems as the  
14 most important factors for serious suicidal thoughts,<sup>14</sup> which may suggest that self-reported work  
15 factors play a more important role in suicidal thoughts in veterinarians than in physicians. Regarding  
16 suicide attempts, veterinarians had a prevalence (0.2%) comparable to those of physicians and police  
17 (0.3% and 0.1%, respectively).<sup>14 26</sup>

18 The relatively high prevalence of suicidal feelings and thoughts concurs with findings among  
19 veterinarians in other countries. Two studies used “National Survey of Psychiatric Morbidity”,<sup>5 45</sup> an  
20 item originally sourced from Paykel’s instrument.<sup>30</sup> These items use the same wording for items one  
21 and three, which makes comparison possible. The prevalence of suicidal feelings in the past year  
22 among veterinarians in Norway was slightly higher (26.6%) than among those in the UK (23.0%)<sup>45</sup> and  
23 Canada (17.9%),<sup>5</sup> whereas suicidal thoughts the past year were at the same level (19.6%, 21.3%, and  
24 19.4%, respectively). However, veterinarians in Canada reported higher prevalence (17.0%) of serious  
25 suicidal thoughts than in Norway (5.4%), which is probably due to the reporting period for serious  
26 suicidal thoughts in the Canadian survey being ‘since the start of veterinary education’, while in the  
27 present study, the reporting period was the preceding year.

28 Moreover, like female physicians,<sup>14</sup> female veterinarians had higher levels of suicidal feelings and  
29 thoughts than their male colleagues. Gender differences were also present in the self-reported  
30 contributing factors, as female veterinarians reported work problems more frequently than men.  
31 According to our own results and those of others’,<sup>14</sup> work problems are more often considered a  
32 contributing factor to suicidal thoughts by veterinarians than by physicians. The perceived impact of  
33 work-factors on serious suicidal thoughts may be partly influenced by the fact that veterinarians in

1  
2  
3 1 Norway have less undergraduate training in communication, psychology and coping skills, and  
4 2 experience more professional isolation. Additionally, animal health care poses a cost issue (in  
5 3 Norway, human health care costs are funded by tax revenues), resulting in cross pressure for  
6 4 veterinarians at the intersection of animal welfare, costs, and ethics. Conflicting responsibilities in  
7 5 the veterinary profession may be an overarching theme contributing to significant stress among  
8 6 veterinarians.<sup>13</sup>

9  
10 7 Today, approximately 70 % of veterinarians in Norway are female, and this proportion is expected to  
11 8 increase. There was no significant effect of gender in the adjusted model. This may be because age  
12 9 was highly correlated with the female gender. Being single and experiencing negative life events  
13 10 predicted serious suicidal thoughts in the present study (76 % and 43 % higher odds, respectively).  
14 11 These findings are consistent with studies on physicians and others.<sup>14 15 18</sup> In contrast to physicians,  
15 12 where family and relationship issues were the most significant negative life events,<sup>14</sup> economic  
16 13 problems (OR = 10.88, 95 % CI 5.20-22.78, p<0.001) were the most significant negative life event for  
17 14 veterinarians. This also supports the hypothesis that there are other factors associated with suicidal  
18 15 thoughts among veterinarians than with physicians and that economic concerns are more important  
19 16 with veterinarians. In an Australian qualitative study, veterinarians were asked what they would do if  
20 17 they could change something in the profession, and the most common response was to remove  
21 18 money from the decision-making process.<sup>13</sup> Contrary to the findings in a recent review,<sup>16</sup>  
22 19 experiencing negative life events had a greater impact on serious suicidal thoughts among women  
23 20 than among men. Furthermore, work/life balance had a greater impact on serious suicidal thoughts  
24 21 among men than among women. These findings warrant further research.

25  
26 22 Bivariately, drinking to cope was a significant predictor for serious suicidal thoughts, but not in the  
27 23 multivariate model. Previous research indicates that alcohol use is a risk factor for suicidal behavior.<sup>17</sup>  
28 24 Research on veterinarians and alcohol use is scarce.<sup>8 46</sup> In a study examining drug-caused deaths in  
29 25 Australia, veterinarians were the group with the highest prevalence of alcohol detected in post-  
30 26 mortem examinations.<sup>47</sup> Another study found that veterinarians who turned to alcohol to cope with  
31 27 their work-related stress were more likely to have suicidal thoughts.<sup>10</sup> In a recent study examining  
32 28 different occupational groups in the US Army, there was no significant difference in problem drinking  
33 29 in veterinarians, physicians and dentists.<sup>48</sup> The impact of alcohol regarding to mental health among  
34 30 veterinarians warrants further research.

35  
36 31 There was no significant effect on serious suicidal thoughts regarding the main field of work, neither  
37 32 in the bivariate nor in the adjusted model. Subsequently, all job stress factors were significantly  
38 33 associated with serious suicidal thoughts bivariately, but not in the adjusted model. However, in the

1  
2  
3 1 additional analyses, the use of alcohol to cope with tension and all three job stress factors remained  
4 2 significant without reality weakness and mental distress included in the model. The findings of  
5 3 *emotional demands, work/life balance, and fear of complaints/criticism* as important job stress  
6 4 factors concur with previous research.<sup>10 8 49</sup> Although previous studies have suggested that work-  
7 5 related stress influences suicide risk in veterinarians,<sup>50</sup> longitudinal research design may further  
8 6 elaborate on the role of mediating and confounding effects.

9  
10  
11  
12  
13  
14 7 Contrary to previous research,<sup>18 26 27</sup> the personality trait reality weakness, was not significant in the  
15 8 adjusted model. This may be explained by the high correlation between mental distress and reality  
16 9 weakness. The impact of mental distress on suicidal thoughts was high, with a nearly three times  
17 10 increase in odds for each step on the 1-5 scale. The direction of causality obtaining between job  
18 11 stress and mental health in this study cannot be unequivocally assessed. On the assumption that job  
19 12 stress actually is an effect of mental distress and reality weakness, our results would indicate that the  
20 13 effect of job stress factors probably was confounded by mental distress and reality weakness.  
21 14 However, if job stress is defined as the underlying causal factor, as posited above, our results would  
22 15 indicate that mental distress and reality weakness mediate the effect of job stress. Previous studies  
23 16 have found that psychosocial factors in the workplace may play a role for mental health,<sup>51</sup> and that  
24 17 individual factors such as stress are related to the way people perceive their jobs.<sup>52</sup> The importance  
25 18 of mental distress with respect to suicidal ideation is consistent with other research, both among  
26 19 medical doctors and others.<sup>15 17</sup>

27  
28  
29  
30  
31  
32  
33  
34  
35  
36  
37 20 To our knowledge, this is the only nationwide study of suicidal behavior in veterinarians,  
38 21 incorporating all authorized veterinarians, in all main fields of work. A major strength was the high  
39 22 response rate (75 %), making multivariable analyses feasible, and reducing the effect of selection and  
40 23 response biases. Additionally, the questionnaire was quite extensive, allowing the use of a  
41 24 comprehensive predictor model and controlling for several variables. An important limitation is the  
42 25 cross-sectional design, which restricts conclusions about causality. The generalizability of the results  
43 26 may also be limited due to differences in the organization of work life, including workload, in other  
44 27 countries. Nevertheless, we believe the findings are representative of veterinarians in Northern  
45 28 Europe. The study was conducted during the coronavirus-pandemic of 2019 (Covid-19), which may  
46 29 have affected the results. The survey was planned before the pandemic, and any potential effects of  
47 30 Covid-19 (e.g., redundancy, and economic effects in the practices) were not accounted for.

48  
49  
50  
51  
52  
53  
54  
55  
56  
57  
58  
59  
60



## 1           2 3           1   **CONCLUSION**

4  
5           2   In summary, the level of suicidal behavior among veterinarians in Norway is relatively high, and both  
6           3   individual and work-related factors contribute to serious suicidal thoughts. In the multivariable  
7           4   analyses, the individual factors, and particularly mental distress, played a more important role than  
8           5   the work-related factors, while veterinarians themselves regarded work problems as the most  
9           6   contributing factor to their suicidal thoughts. The roles of gender and specific work-related factors  
10          7   should be further investigated to better understand the complexity of suicidal behavior among  
11          8   veterinarians.  
12  
13  
14  
15  
16  
17  
18  
19  
20

## 21          10   **ACKNOWLEDGMENTS**

22  
23          11   We would like to express our gratitude to the Norwegian Veterinary Association, including The Small  
24          12   Animal Veterinary Association, The Aquaculture Veterinary Association, and Oslo & Akershus  
25          13   Veterinary Association, as well as MSD Animal Health, for their financial support, making it possible  
26          14   to collect data for this study. Professors Magne Thoresen and Torbjørn Moum have made substantial  
27          15   input to the statistical analyses.  
28  
29  
30  
31  
32  
33  
34  
35  
36  
37

## 38          18   **AUTHOR'S CONTRIBUTION TO THE MANUSCRIPT**

39  
40          19   HSD, RT, and EH designed the study and analyzed the data. HSD wrote the first draft of the  
41          20   manuscript. All authors revised the manuscript and approved the final version of the manuscript. The  
42          21   corresponding author attests that all listed authors meet authorship criteria and that no others  
43          22   meeting the criteria have been omitted. HSD and EH acts as a guarantor.  
44  
45  
46  
47  
48  
49  
50

## 51          24   **DATA AVAILABILITY STATEMENT**

52  
53          25   Data are available upon reasonable request.  
54  
55  
56  
57  
58  
59  
60

1  
2  
3 1 **COMPETING INTERESTS STATEMENT**  
4

5  
6 2 None declared.  
7

8  
9 3

10  
11 4 **FIGURE LEGENDS**  
12

13  
14 5 Supplementary File 4-1 (Interaction between life events and gender): Illustration of the two-way  
15 6 interaction between gender and life events (weighted). The life events scale has been divided into  
16  
17 7 four categories to improve readability of the graph. The gradient is significantly steeper for females  
18  
19 8 than males.

20  
21 9 Supplementary File 4-2 (Interactions between work/life-balance and gender): Illustration of the two-  
22  
23 10 way interaction between gender and work/life-balance. The increase in suicidal thoughts with higher  
24  
25 11 work/life imbalance was significantly stronger among males than among females.  
26

27  
28  
29  
30  
31  
32 12

33  
34  
35  
36  
37  
38  
39  
40  
41  
42  
43  
44  
45  
46  
47  
48  
49  
50  
51  
52  
53  
54  
55  
56  
57  
58  
59  
60

32 14 **FUNDING STATEMENT**  
33

34  
35 15 This work was funded by the Institute of Basic Medical Sciences, Faculty of Medicine at the University  
36  
37 16 of Oslo as an internal Ph.D. fellowship and financially supported by the Norwegian Veterinary  
38  
39 17 Association, including the Small Animal Veterinary Association, the Aquaculture Veterinary  
40  
41 18 Association and Oslo and Akershus Veterinary Association, and MSD Animal Health. The sponsors had  
42  
43 19 no role in the collection, analysis, and interpretation of data, in the writing of the report, and in the  
44  
45 20 decision to submit the paper for publication. The authors had full access to all the data in this study  
46  
47 21 and take complete responsibility for the integrity of the data and the accuracy of the data analyses.  
48  
49 22  
50  
51  
52  
53  
54  
55  
56  
57  
58  
59  
60

1  
2  
3 1 REFERENCES  
4

- 5  
6 2 1. Platt B, Hawton K, Simkin S, et al. Systematic review of the prevalence of suicide in veterinary  
7 3 surgeons. *Occup Med (Lond)* 2010;60:436-46. doi: 10.1093/occmed/kqq044  
8 4 2. Milner AJ, Niven H, Page K, et al. Suicide in veterinarians and veterinary nurses in Australia: 2001-  
9 5 2012. *Aust Vet J* 2015;93:308-10. doi: 10.1111/avj.12358  
10 6 3. Tomasi SE, Fechter-Leggett ED, Edwards NT, et al. Suicide among veterinarians in the United States  
11 7 from 1979 through 2015. *J Am Vet Med Assoc* 2019;254:104-12. doi:  
12 8 10.2460/javma.254.1.104  
13 9 4. Witte TK, Spitzer EG, Edwards N, et al. Suicides and deaths of undetermined intent among  
14 10 veterinary professionals from 2003 through 2014. *J Am Vet Med Assoc* 2019;255:595-608.  
15 11 doi: 10.2460/javma.255.5.595  
16 12 5. Perret JL, Best CO, Coe JB, et al. Prevalence of mental health outcomes among Canadian  
17 13 veterinarians. *J Am Vet Med Assoc* 2020;256:365-75. doi: 10.2460/javma.256.3.365  
18 14 6. Schwerdtfeger KA, Bahramsoltani M, Spangenberg L, et al. Depression, suicidal ideation and  
19 15 suicide risk in German veterinarians compared with the general German population. *Vet Rec*  
20 16 2020;186:e2. doi: 10.1136/vr.105430  
21 17 7. Nett RJ, Witte TK, Holzbauer SM, et al. Risk factors for suicide, attitudes toward mental illness, and  
22 18 practice-related stressors among US veterinarians. *J Am Vet Med Assoc* 2015;247:945-55.  
23 19 doi: 10.2460/javma.247.8.945  
24 20 8. Platt B, Hawton K, Simkin S, et al. Suicidal behaviour and psychosocial problems in veterinary  
25 21 surgeons: a systematic review. *Soc Psychiatry Psychiatr Epidemiol* 2012;47:223-40. doi:  
26 22 10.1007/s00127-010-0328-6  
27 23 9. Platt B, Hawton K, Simkin S, et al. Suicidality in the veterinary profession: interview study of  
28 24 veterinarians with a history of suicidal ideation or behavior. *Crisis* 2012;33:280-9. doi:  
29 25 10.1027/0227-5910/a000143  
30 26 10. Wallace JE. Burnout, coping and suicidal ideation: an application and extension of the job  
31 27 demand-control-support model. *J Workplace Behav Health* 2017;32:99-118. doi:  
32 28 10.1080/15555240.2017.1329628  
33 29 11. Dow MQ, Chur-Hansen A, Hamood W, et al. Impact of dealing with bereaved clients on the  
34 30 psychological wellbeing of veterinarians. *Aust Vet J* 2019;97:382-9. doi: 10.1111/avj.12842  
35 31 12. Waters D, Barnhart G, Cowan J, et al. Attachment loss and trauma: A descriptive  
36 32 phenomenological analysis of suicidality and depression in veterinarians. *Psychol Trauma*  
37 33 2019. doi: 10.1037/tra0000544  
38 34 13. Whitnall VM, Simmonds JG. Occupational stress and coping strategies in experienced Australian  
39 35 veterinarians. *Vet Rec* 2021;189:e202. doi: 10.1002/vetr.202  
40 36 14. Hem E, Grønvold NT, Aasland OG, et al. The prevalence of suicidal ideation and suicidal attempts  
41 37 among Norwegian physicians. Results from a cross-sectional survey of a nationwide sample.  
42 38 *Eur Psychiatry* 2000;15:183-9. doi: 10.1016/s0924-9338(00)00227-3  
43 39 15. Tyssen R, Vaglum P, Grønvold NT, et al. Suicidal ideation among medical students and young  
44 40 physicians: a nationwide and prospective study of prevalence and predictors. *J Affect Disord*  
45 41 2001;64:69-79. doi: 10.1016/s0165-0327(00)00205-6  
46 42 16. Howarth EJ, O'Connor DB, Panagioti M, et al. Are stressful life events prospectively associated  
47 43 with increased suicidal ideation and behaviour? A systematic review and meta-analysis. *J*  
48 44 *Affect Disord* 2020;266:731-42. doi: 10.1016/j.jad.2020.01.171  
49 45 17. Turecki G, Brent DA. Suicide and suicidal behaviour. *Lancet* 2016;387:1227-39. doi:  
50 46 10.1016/s0140-6736(15)00234-2  
51 47 18. Tyssen R, Hem E, Vaglum P, et al. The process of suicidal planning among medical doctors:  
52 48 predictors in a longitudinal Norwegian sample. *J Affect Disord* 2004;80:191-8. doi:  
53 49 10.1016/s0165-0327(03)00091-0  
54  
55  
56  
57  
58  
59  
60

19. O'Connor RC, Nock MK. The psychology of suicidal behaviour. *Lancet Psychiatry* 2014;1:73-85. doi: 10.1016/s2215-0366(14)70222-6
20. Reijula K, Räsänen K, Hämäläinen M, et al. Work environment and occupational health of Finnish veterinarians. *Am J Ind Med* 2003;44:46-57. doi: 10.1002/ajim.10228
21. Kersebohm JC, Lorenz T, Becher A, et al. Factors related to work and life satisfaction of veterinary practitioners in Germany. *Vet Rec Open* 2017;4:e000229. doi: 10.1136/vetreco-2017-000229
22. Allen LC. Feminisation: threat or opportunity? *Vet Rec* 2016;178:391-3. doi: 10.1136/vr.i2140
23. Hatch PH, Winefield HR, Christie BA, et al. Workplace stress, mental health, and burnout of veterinarians in Australia. *Aust Vet J* 2011;89:460-8. doi: 10.1111/j.1751-0813.2011.00833.x
24. Brezo J, Paris J, Turecki G. Personality traits as correlates of suicidal ideation, suicide attempts, and suicide completions: a systematic review. *Acta Psychiatr Scand* 2006;113:180-206. doi: 10.1111/j.1600-0447.2005.00702.x
25. Torgersen S, Alnæs R. Localizing DSM-III personality disorders in a three-dimensional structural space. *J Pers Disord* 1989;3:274-81. doi: 10.1521/pedi.1989.3.4.274
26. Berg AM, Hem E, Lau B, et al. Suicidal ideation and attempts in Norwegian police. *Suicide Life Threat Behav* 2003;33:302-12. doi: 10.1521/suli.33.3.302.23215
27. Sterud T, Hem E, Lau B, et al. Suicidal ideation and suicide attempts in a nationwide sample of operational Norwegian ambulance personnel. *J Occup Health* 2008;50:406-14. doi: 10.1539/joh.l8025
28. Blair A, Hayes HM, Jr. Cancer and other causes of death among U.S. veterinarians, 1966-1977. *Int J Cancer* 1980;25:181-5. doi: 10.1002/ijc.2910250203
29. Gardner DH, Hini D. Work-related stress in the veterinary profession in New Zealand. *N Z Vet J* 2006;54:119-24. doi: 10.1080/00480169.2006.36623
30. Paykel ES, Myers JK, Lindenthal JJ, et al. Suicidal feelings in the general population: a prevalence study. *Br J Psychiatry* 1974;124:460-9. doi: 10.1192/bjp.124.5.460
31. Rosta J, Aasland OG. Changes in the lifetime prevalence of suicidal feelings and thoughts among Norwegian doctors from 2000 to 2010: a longitudinal study based on national samples. *BMC Psychiatry* 2013;13:322. doi: 10.1186/1471-244x-13-322
32. Torgersen S. Hereditary-environmental differentiation of general neurotic, obsessive, and impulsive hysterical personality traits. *Acta Genet Med Gemellol (Roma)* 1980;29:193-207. doi: 10.1017/s0001566000007935
33. Tyssen R. Personality traits. In: Brower K, Riba M, eds. *Physician Mental Health and Well-Being: Research and Practice*. USA: Springer, 2017:211-36.
34. Mahmood JI, Grotmol KS, Tesli M, et al. Life satisfaction in Norwegian medical doctors: a 15-year longitudinal study of work-related predictors. *BMC Health Serv Res* 2019;19:729. doi: 10.1186/s12913-019-4599-7
35. Derogatis L. *Administration, scoring and procedures manual*. 2nd ed. Baltimore, MD.: Procedures Psychometric Research, SCL-90-R 1983.
36. Tambs K, Moum T. How well can a few questionnaire items indicate anxiety and depression? *Acta Psychiatr Scand* 1993;87:364-7. doi: 10.1111/j.1600-0447.1993.tb03388.x
37. Ruud N, Løvseth LT, Rø KE, et al. Comparing mental distress and help-seeking among first-year medical students in Norway: results of two cross-sectional surveys 20 years apart. *BMJ Open* 2020;10:e036968. doi:10.1136/bmjopen-2020-036968
38. Rø KE, Gude T, Tyssen R., et al. Counselling for burnout in Norwegian doctors: one year cohort study. *BMJ* 2008;337:a2004. doi:10.1136/bmj.a2004
39. Timmer SG, Verhoff J, Colten ME. Life stress, helplessness, and the use of alcohol and drugs to cope: an analysis of national survey data. In: Shiffman S, Wills TA, eds. *Coping and Substance Use*. Orlando, FL: Academic Press, 1985, 171-98.
40. Tyssen R, Vaglum P, Aasland OG, et al. Use of alcohol to cope with tension, and its relation to gender, years in medical school and hazardous drinking: a study of two nation-wide Norwegian samples of medical students. *Addiction* 1998;93:1341-9. doi: 10.1046/j.1360-0443.1998.93913415.x

- 1  
2  
3 1 41. Sterud T, Hem E, Ekeberg O, et al. Occupational stress and alcohol use: a study of two nationwide  
4 2 samples of operational police and ambulance, personnel in Norway. *J Stud Alcohol Drugs*  
5 3 2007;68:896-904. doi: 10.15288/jsad.2007.68.896  
6 4  
7 42. Mahmood JI, Støen Grotmol K, Tesli M, et al. Contextual Factors and Mental Distress as Possible  
8 5 Predictors of Hazardous Drinking in Norwegian Medical Doctors: A 15-Year Longitudinal,  
9 6 Nationwide Study. *Eur Addict Res* 2017;23:19-27. doi: 10.1159/000452442  
10 7  
11 43. Cooper CL, Rout U, Faragher B. Mental health, job satisfaction, and job stress among general  
12 8 practitioners. *BMJ* 1989;298:366-70.  
13 9  
14 44. Tyssen R, Vaglum P, Grønvold NT et al. The impact of job stress and working conditions on mental  
15 10 health problems among junior house officers. A nationwide Norwegian prospective cohort  
16 11 study. *Med Educ* 2000;34:374-84.  
17 12  
18 45. Bartram DJ, Yadegarfar G, Baldwin DS. A cross-sectional study of mental health and well-being  
19 13 and their associations in the UK veterinary profession. *Soc Psychiatry Psychiatr Epidemiol*  
20 14 2009;44:1075-85. doi: 10.1007/s00127-009-0030-8  
21 15  
22 46. Harling M, Strehmel P, Schablon A, et al. Psychosocial stress, demoralization and the  
23 16 consumption of tobacco, alcohol and medical drugs by veterinarians. *J Occup Med Toxicol*  
24 17 2009;4:4. doi: 10.1186/1745-6673-4-4  
25 18  
26 47. Pilgrim JL, Dorward R, Drummer OH. Drug-caused deaths in Australian medical practitioners and  
27 19 health-care professionals. *Addiction* 2017;112:486-93. doi: 10.1111/add.13619  
28 20  
29 48. Rivera AC, Geronimo-Hara TR, LeardMann CA. Behavioural health and sleep problems among US  
30 21 Army veterinarians and veterinary technicians participating in the Millenium Cohort Study. *J*  
31 22 *Am Vet Med Assoc* 2021;258:767-75. doi:10.2460/javma.258.7.767  
32 23  
33 49. Bartram DJ, Yadegarfar G, Baldwin DS. Psychosocial working conditions and work-related  
34 24 stressors among UK veterinary surgeons. *Occup Med (Lond)* 2009;59:334-41. doi:  
35 25 10.1093/ocmed/kqp072  
36 26  
37 50. Bartram DJ, Baldwin DS. Veterinary surgeons and suicide: a structured review of possible  
38 27 influences on increased risk. *Vet Rec* 2010;166:388-97. doi: 10.1136/vr.b4794  
39 28  
40 51. Stansfeld S, Candy B. Psychosocial work environment and mental health – a meta-analytic review.  
41 29 *Scand J Work Environ Health* 2006;32:443-62. doi: 10.5271/sjweh.1050  
42 30  
43 52. Firth-Cozens J, Hardy GE. Occupational stress, clinical treatment and changes in job perceptions. *J*  
44 31 *Occup Organ Psychol* 1992;65:81-8. doi: [https://doi.org/10.1111/j.2044-](https://doi.org/10.1111/j.2044-8325.1992.tb00486.x)  
45 32 [8325.1992.tb00486.x](https://doi.org/10.1111/j.2044-8325.1992.tb00486.x)  
46 33  
47 34  
48 35  
49 36  
50 37  
51  
52  
53  
54  
55  
56  
57  
58  
59  
60

# NORVET-undersøkelsen

## Arbeid, trivsel og mental helse hos veterinærer i Norge

På de fleste spørsmålene skal du angi svar ved å sette et kryss i en rute slik .  
Vennligst benytt en penn og sett krysset tydelig i ruten.

Noen steder skal du sette tall eller bokstaver i en eller flere ruter, slik  eller slik .

Skjemaene vil bli lest maskinelt, derfor er det viktig at du skriver tydelig i rutene.

Det er svært viktig at du velger å merke av bare ett svaralternativ, der ikke annet fremgår av teksten.  
Hvis to alternativer synes like dekkende, bes du velge det ene. Dette vil jevne seg ut på gruppenivå.

Selv om det kanskje er noen spørsmål du synes er mindre viktige, ber vi deg svare likevel.  
Det vil bidra til å styrke undersøkelsen.

Det vil være en del spørsmål som blir gjentatt flere ganger i skjemaet. Dette skyldes at de utgjør en integrert del av standardiserte måleinstrumenter. Noen ganger spørres det også om opplysninger for ulike tidsperioder. Dette gjøres for å kunne foreta pålitelige sammenligninger med flere andre grupper, nasjonalt og internasjonalt.

**LYKKE TIL, OG PÅ FORHÅND TUSEN TAKK FOR INNSATSEN!**

## A. BAKGRUNNSOPPLYSNINGER

### A1 Kjønn:

- Kvinne  
 Mann  
 Annen kjønnsidentitet

### A3 Nåværende sivilstatus

- Ugift       Separert  
 Samboende     Skilt  
 Gift             Enke/enkemann

### A2 Alder:

- 20-25    26-30    31-35    36-40    41-45    46-50    51-55    56-60    61-65    66-70    >70

### Partner

#### A4 Har du fast partner (kjæreste/samboer/ektefelle)?

- Nei  
 Ja

#### A5 Hvis JA, er din partner i arbeid?

- Nei  
 Ja

#### A6 Hvis JA, er din partner veterinær?

- Nei  
 Ja

### Barn og familie

#### A7 Hvor mange barn har du?

- Ingen    1 barn    2 barn    3 eller flere barn

### HAR DU I LØPET AV DE SISTE 12 MND. OPPLEVD NOE AV DET FØLGENDE?

- |                                                                                                   |                          |                                                                              |                          |
|---------------------------------------------------------------------------------------------------|--------------------------|------------------------------------------------------------------------------|--------------------------|
| A8 En alvorlig sykdom eller ulykke                                                                | <input type="checkbox"/> | A18 Samlivsproblemer                                                         | <input type="checkbox"/> |
| A9 Skilsmisse/separasjon med samboer eller kjæreste                                               | <input type="checkbox"/> | A19 Flyttet fra foreldre                                                     | <input type="checkbox"/> |
| A10 Giftet deg/flyttet sammen med samboer                                                         | <input type="checkbox"/> | A20 Permisjon                                                                | <input type="checkbox"/> |
| A11 Fått barn                                                                                     | <input type="checkbox"/> | A21 Sykefravær 21 dager eller mer                                            | <input type="checkbox"/> |
| A12 Dødsfall familie/nære venner                                                                  | <input type="checkbox"/> | A22 Du selv har vært involvert i tilsynssak fra tilsynsmyndigheter           | <input type="checkbox"/> |
| A13 Andre vansker hos nær familie                                                                 | <input type="checkbox"/> | A23 Alvorlig sykdom hos et nærtstående familiemedlem (partner/barn/foreldre) | <input type="checkbox"/> |
| A14 Alvorlige økonomiske problemer                                                                | <input type="checkbox"/> | A24 Andre alvorlige hendelser Spesifiser:                                    | <input type="checkbox"/> |
| A15 Ektefelle har vært arbeidsløs/permittert                                                      | <input type="checkbox"/> |                                                                              |                          |
| A16 Alvorlige bomessige problemer                                                                 | <input type="checkbox"/> |                                                                              |                          |
| A17 Du selv, eller noen i nær familie, har vært utsatt for, eller innblandet i, alvorlig lovbrudd | <input type="checkbox"/> |                                                                              |                          |

## B. ARBEIDSFORHOLD OG ARBEIDSBELASTNING

### Hovedstilling

#### B1 Hvilken tilknytningsform har du til arbeidslivet?

Ansatt  Selvstendig næringsdrivende  Annet, spesifiser: \_\_\_\_\_

#### B2 Har du en lederrolle?

Ja  Nei

#### B3 Hva slags hovedstilling har du nå?

Smådyrpraksis

Produksjonsdyrpraksis

Kombinertpraksis

Hestepraksis

Akvakultur

Offentlig forvaltning

Akademia/forskning

Pensjonist

Annet, eventuelt spesifiser: \_\_\_\_\_

#### B3a Hva slags stilling er dette?

Fast stilling

Tidsbegrenset utdanningsstilling

Vikariat      Hvis vikariat, fyll inn antall mnd

Annet      (samlet lengde)

#### B3b Jobber du i

Bedrift som er del av kjede  Frittstående bedrift

B4 Hvor mange måneder har du vært i din nåværende stilling? I ca.    måneder

### Arbeidstidsforhold

#### B5 Hvor mange prosent er din hovedstilling?

Angi prosent:

%

#### B6 Hvor lang er din fastlagte arbeidstid i timer per uke i din hovedstilling?

timer og   minutter pr uke

#### B7 Hvor mange timer jobber du faktisk i gjennomsnitt pr. uke (inkludert alle stillinger)?

timer

#### B8 I en gjennomsnittlig arbeidsuke, inkludert ev. bistilling(er), omtrent hvor mange timer pr. uke bruker du på:

|                    |                                                 |                      |                                                 |
|--------------------|-------------------------------------------------|----------------------|-------------------------------------------------|
| 1.1 Klinisk arbeid | <input type="text"/> <input type="text"/> timer | 1.2 Møtevirksomhet   | <input type="text"/> <input type="text"/> timer |
| 1.3 Papirarbeid    | <input type="text"/> <input type="text"/> timer | 1.4 Telefoner/e-post | <input type="text"/> <input type="text"/> timer |
| 1.5 Reisetid       | <input type="text"/> <input type="text"/> timer | 1.6 Totalt           | <input type="text"/> <input type="text"/> timer |



**B9** Hvor mange timer overtid har du i gjennomsnitt i din hovedstilling i en vanlig arbeidsuke? (Ikke forlenget arbeidstid eller utrykning på vakt, kun tilfeldig overtid.)

Betalt:

Ubetalt:

timer pr. uke

timer pr. uke

**B10** Hvor ofte har du overtidarbeid/forlenget arbeidstid (betalt eller ubetalt)?

- Aldri
- Sjeldnere enn en gang i måneden
- Minst en gang i måneden
- Omtrent annenhver uke
- Hver uke

### Bistilling

**B11** Har du noen fast bistilling eller ekstrajobb i tillegg til din hovedstilling?

- Nei
- Ja

**B12** Hvis du har en bistilling, hvor mange arbeidstimer utgjør denne stillingen gjennomsnittlig pr. uke?

timer pr. uke

### Vakter som veterinær

**B13** Hvis du har faste vakter ut over normal arbeidstid i din hovedstilling, hva slags vaktordning har du nå?

- Tar ikke faste vakter \*     9-delt    *\*Gå til spørsmål B18*
- 2-3-delt     10-delt
- 4-5-delt     11-delt
- 6-7-delt     >12-delt
- 8-delt

**B14** Hvilken type vaktordning deltar du i?

- Offentlig vakt     Privat vakt

**B15** Hvis du tar faste vakter ut over normal arbeidstid i din hovedstilling, hvor lange er vaktene?

- Ca 1/2 døgn
- Ca. 1 døgn
- Mer enn 1 døgn
- Annet; hva \_\_\_\_\_

**B16 Ca. hvor mange timer av dine faste vakter tilbringer du**Aktiv:   timer

Har du

Hvilende:   timer tilstedevakt eller  hjemmevaktSovende:   timer**B17 Hvis du har faste vakter, cirka hvor lenge arbeider du dagen etter vakt?** Arbeider ikke rett etter vakt 1-3 timer 4-6 timer 7 timer eller mer**B18 Hvis du har vakter som en del av en bistilling, cirka hvor mange timer av disse vaktene tilbringer du***Hvis du ikke har vakt som del av bistilling, gå til B19*Aktiv:   timerHvilende:   timer

Har du

Sovende:   timer tilstedevakt eller  hjemmevakt**B19 Cirka hvor mange avspaseringsuker pr. halvår benytter du til ikke-faglig aktivitet?** Ingen uke 1 uke 2 uker 3 uker 4 uker 5 uker 6 uker eller flere**B20 Dersom du jobber i klinisk praksis, hvor mange avlivinger utfører du omtrent på en vanlig uke?** 0-4 5-9 10-14 15 eller fler

**Belastningsfaktorer**

**I hvilken grad gjør de følgende situasjoner/faktorer deg belastet (stresset)?**

**Sett ett kryss i den ruten som passer best for deg.**

|                                                                         | Ikke noen belastning     | Litt belastning          | Endel belastning         | Mye belastning           | Svært mye belastning     |
|-------------------------------------------------------------------------|--------------------------|--------------------------|--------------------------|--------------------------|--------------------------|
| <b>B21</b> Kritikk av veterinærer i media                               | <input type="checkbox"/> |
| <b>B22</b> Kundene/dyreeierne setter ikke pris på det du gjør           | <input type="checkbox"/> |
| <b>B23</b> Bekymring over klager fra kunder/dyreeiere                   | <input type="checkbox"/> |
| <b>B24</b> Å ha ansvar for dyrenes liv 24 timer i døgnet                | <input type="checkbox"/> |
| <b>B25</b> Telefoner, sykebesøk og utrykning om natten                  | <input type="checkbox"/> |
| <b>B26</b> Å ta seg av vanskelige veterinærmedisinske problemstillinger | <input type="checkbox"/> |
| <b>B27</b> Å ta seg av vanskelige kunder/dyreeiere                      | <input type="checkbox"/> |
| <b>B28</b> Krysspress mellom økonomi og dyrevelferd/etikk               | <input type="checkbox"/> |
| <b>B29</b> Bekymringer knyttet til egen økonomi                         | <input type="checkbox"/> |
| <b>B30</b> Bekymringer knyttet til bedriftens økonomi                   | <input type="checkbox"/> |
| <b>B31</b> Sykejournaler og annet papirarbeid                           | <input type="checkbox"/> |
| <b>B32</b> Kirurgiske inngrep                                           | <input type="checkbox"/> |
| <b>B33</b> Arbeidsmiljøet                                               | <input type="checkbox"/> |
| <b>B34</b> Tidspress                                                    | <input type="checkbox"/> |
| <b>B35</b> Jobben går ut over familieliv                                | <input type="checkbox"/> |
| <b>B36</b> Jobben går ut over sosialt liv                               | <input type="checkbox"/> |
| <b>B37</b> Daglig kontakt med døende og kritisk syke dyr                | <input type="checkbox"/> |
| <b>B38</b> Å ta seg av dødssyke dyr og deres eiere                      | <input type="checkbox"/> |
| <b>B39</b> Forespørsler om dyr fra venner og bekjente                   | <input type="checkbox"/> |
| <b>B40</b> Forespørsler om dyr fra slektninger                          | <input type="checkbox"/> |
| <b>B41</b> Være i generell beredskap                                    | <input type="checkbox"/> |

|                                                                                           | Ikke noen belastning     | Litt belastning          | Endel belastning         | Mye belastning           | Svært mye belastning     |
|-------------------------------------------------------------------------------------------|--------------------------|--------------------------|--------------------------|--------------------------|--------------------------|
| <b>B42</b> Følelsesmessig engasjement i dyrene                                            | <input type="checkbox"/> |
| <b>B43</b> Forventninger om at veterinæren også skal hjelpe med ikke-medisinske problemer | <input type="checkbox"/> |
| <b>B44</b> Avbrytelser og mas i arbeidssituasjonen                                        | <input type="checkbox"/> |
| <b>B45</b> Å ta seg av lidende dyr                                                        | <input type="checkbox"/> |
| <b>B46</b> Konflikt med kolleger/medarbeidere                                             | <input type="checkbox"/> |
| <b>B47</b> Å få til en balanse mellom arbeid og privatliv                                 | <input type="checkbox"/> |

**Forhold til kolleger**

|                                                                                  | Ingen grad               |                          |                          |                          | I svært høy grad         |                          |                          |                          |
|----------------------------------------------------------------------------------|--------------------------|--------------------------|--------------------------|--------------------------|--------------------------|--------------------------|--------------------------|--------------------------|
| <b>B48</b> I hvilken grad trives du i det store og det hele blant dine kolleger? | <input type="checkbox"/> |
| <b>B49</b> I hvor stor grad har du følt deg ivaretatt av dine veterinærkolleger? | <input type="checkbox"/> |
|                                                                                  | Stemmer helt             |                          | Stemmer ganske bra       |                          | Stemmer ikke særlig bra  |                          | Stemmer ikke             |                          |
| <b>B50</b> Det er rolig og behagelig stemning på min arbeidsplass                | <input type="checkbox"/> |
| <b>B51</b> Det er godt samhold                                                   | <input type="checkbox"/> |
| <b>B52</b> Mine arbeidskolleger stiller opp for meg                              | <input type="checkbox"/> |
| <b>B53</b> Det er forståelse for at jeg kan ha en dårlig dag                     | <input type="checkbox"/> |
| <b>B54</b> Jeg kommer godt overens med mine overordnede*                         | <input type="checkbox"/> |
| <b>B55</b> Jeg trives bra med mine arbeidskolleger                               | <input type="checkbox"/> |

\*Besvares bare dersom du har en overordnet.

**B56** Når du føler deg bekymret, engstelig eller nervøs - drikker du noen gang alkohol for å klare situasjonen bedre?

Aldri    Sjelden    Av og til    Ofte

**Vedrørende ditt arbeid**

|            |                                                                                  | Meget sjelden eller aldri | Nokså sjelden            | Av og til                | Nokså ofte               | Meget ofte eller alltid  |
|------------|----------------------------------------------------------------------------------|---------------------------|--------------------------|--------------------------|--------------------------|--------------------------|
| <b>B57</b> | Er det fastsatt klare mål for din jobb?                                          | <input type="checkbox"/>  | <input type="checkbox"/> | <input type="checkbox"/> | <input type="checkbox"/> | <input type="checkbox"/> |
| <b>B58</b> | Vet du hva som er ditt ansvarsområde?                                            | <input type="checkbox"/>  | <input type="checkbox"/> | <input type="checkbox"/> | <input type="checkbox"/> | <input type="checkbox"/> |
| <b>B59</b> | Vet du nøyaktig hva som forventes av deg i jobben?                               | <input type="checkbox"/>  | <input type="checkbox"/> | <input type="checkbox"/> | <input type="checkbox"/> | <input type="checkbox"/> |
| <b>B60</b> | Må du gjøre ting du mener burde vært gjort annerledes?                           | <input type="checkbox"/>  | <input type="checkbox"/> | <input type="checkbox"/> | <input type="checkbox"/> | <input type="checkbox"/> |
| <b>B61</b> | Får du oppgaver uten tilstrekkelig hjelpemidler og ressurser til å fullføre dem? | <input type="checkbox"/>  | <input type="checkbox"/> | <input type="checkbox"/> | <input type="checkbox"/> | <input type="checkbox"/> |
| <b>B62</b> | Mottar du motstridende forespørsler fra to eller flere personer?                 | <input type="checkbox"/>  | <input type="checkbox"/> | <input type="checkbox"/> | <input type="checkbox"/> | <input type="checkbox"/> |
| <b>B63</b> | Fordeler din nærmeste sjef arbeidsoppgaver rettferdig og upartisk?*              | <input type="checkbox"/>  | <input type="checkbox"/> | <input type="checkbox"/> | <input type="checkbox"/> | <input type="checkbox"/> |
| <b>B64</b> | Behandler din nærmeste sjef de ansatte rettferdig og upartisk?*                  | <input type="checkbox"/>  | <input type="checkbox"/> | <input type="checkbox"/> | <input type="checkbox"/> | <input type="checkbox"/> |
| <b>B65</b> | Er forholdet mellom deg og din nærmeste sjef en kilde til stress for deg?*       | <input type="checkbox"/>  | <input type="checkbox"/> | <input type="checkbox"/> | <input type="checkbox"/> | <input type="checkbox"/> |

\*Besvares bare dersom du har en overordnet.

|            |                                                                  | Ja, ofte                 | Ja, noen ganger          | Nei, sjelden             | Nei, så godt som aldri   |
|------------|------------------------------------------------------------------|--------------------------|--------------------------|--------------------------|--------------------------|
| <b>B66</b> | Krever arbeidet ditt at du arbeider meget raskt?                 | <input type="checkbox"/> | <input type="checkbox"/> | <input type="checkbox"/> | <input type="checkbox"/> |
| <b>B67</b> | Krever arbeidet ditt at du arbeider meget hardt?                 | <input type="checkbox"/> | <input type="checkbox"/> | <input type="checkbox"/> | <input type="checkbox"/> |
| <b>B68</b> | Krever arbeidet ditt for stor arbeidsinnsats?                    | <input type="checkbox"/> | <input type="checkbox"/> | <input type="checkbox"/> | <input type="checkbox"/> |
| <b>B69</b> | Har du tilstrekkelig tid til å utføre arbeidsoppgavene dine?     | <input type="checkbox"/> | <input type="checkbox"/> | <input type="checkbox"/> | <input type="checkbox"/> |
| <b>B70</b> | Forekommer det ofte motstridende krav i arbeidet ditt?           | <input type="checkbox"/> | <input type="checkbox"/> | <input type="checkbox"/> | <input type="checkbox"/> |
| <b>B71</b> | Får du lære nye ting i ditt arbeid?                              | <input type="checkbox"/> | <input type="checkbox"/> | <input type="checkbox"/> | <input type="checkbox"/> |
| <b>B72</b> | Krever ditt arbeid dyktighet?                                    | <input type="checkbox"/> | <input type="checkbox"/> | <input type="checkbox"/> | <input type="checkbox"/> |
| <b>B73</b> | Krever ditt arbeid oppfinnsomhet/kreativitet?                    | <input type="checkbox"/> | <input type="checkbox"/> | <input type="checkbox"/> | <input type="checkbox"/> |
| <b>B74</b> | Innebærer ditt arbeid at du gjør samme ting om og om igjen?      | <input type="checkbox"/> | <input type="checkbox"/> | <input type="checkbox"/> | <input type="checkbox"/> |
| <b>B75</b> | Har du frihet til å bestemme hvordan ditt arbeid skal utføres?   | <input type="checkbox"/> | <input type="checkbox"/> | <input type="checkbox"/> | <input type="checkbox"/> |
| <b>B76</b> | Har du frihet til å bestemme hva som skal utføres i ditt arbeid? | <input type="checkbox"/> | <input type="checkbox"/> | <input type="checkbox"/> | <input type="checkbox"/> |

## C HELSE

Nedenfor finner du en oppstilling av plager som man av og til har.

Les nøye gjennom dem, en for en, og angi deretter hvor mye hvert enkelt problem har plaget deg eller vært til besvær i løpet av de siste 14 dagene

|                                                       | Ikke i det hele tatt     | Litt                     | Måtelig                  | Ganske mye               | Veldig mye               |
|-------------------------------------------------------|--------------------------|--------------------------|--------------------------|--------------------------|--------------------------|
| <b>C1</b> Nervøsitet, indre uro                       | <input type="checkbox"/> |
| <b>C2</b> Stadig redd eller engstelig                 | <input type="checkbox"/> |
| <b>C3</b> Følelse av håpløshet med tanke på fremtiden | <input type="checkbox"/> |
| <b>C4</b> Mye bekymret eller urolig                   | <input type="checkbox"/> |
| <b>C5</b> Nedtrykt, tungsindig                        | <input type="checkbox"/> |

**C6 Hvis du har hatt psykiske problemer i løpet av det siste året, har du da søkt/fått hjelp for dette?**

- Ikke hatt psykiske problemer av betydning\* \*Gå til spørsmål C13
- Har ikke søkt hjelp selv om jeg nok kunne ha hatt behov for det
- Ja, har konsultert allmennlege eller fastlege
- Ja, har konsultert psykolog/psykiater
- Ja, har vært innlagt i psykiatrisk avdeling

**C7 Hvis du har vært i kontakt med psykolog/psykiater, hva slags behandling har du fått?**

*Det er mulig å sette flere klyss*

- 1-5 samtaler
- Flere enn 5 samtaler
- Psykoterapi/psykoanalyse
- Gruppeterapi
- Medikamentell behandling

**Hvis du har hatt psykiske problemer i løpet av det siste året, i hvilken grad mener du at følgende forhold var medvirkende til at det ble vanskelig for deg?**

|                                                       | Betydde ingenting        | Betydde litt             | Betydde endel            | Betydde ganske mye       | Betydde svært mye        |
|-------------------------------------------------------|--------------------------|--------------------------|--------------------------|--------------------------|--------------------------|
| <b>C8</b> Personlige forhold                          | <input type="checkbox"/> |
| <b>C9</b> Forhold til familie/ektefelle/partner       | <input type="checkbox"/> |
| <b>C10</b> Sosiale forhold                            | <input type="checkbox"/> |
| <b>C11</b> Problemer i forbindelse med veterinæryrket | <input type="checkbox"/> |
| <b>C12</b> Andre forhold                              | <input type="checkbox"/> |

**Livsløst**

De følgende spørsmål dreier seg om du i løpet av det siste året har mistet livsløsten, og i så fall i hvilken grad?

**C13** Har du noen gang i løpet av det siste året følt at livet ikke er verdt å leve?

Aldri  Nesten aldri  Noen ganger  Mange ganger

**C14** Har du i løpet av det siste året ønsket at du var død - f.eks. at du skulle sovne inn og aldri våkne igjen?

Aldri  Nesten aldri  Noen ganger  Mange ganger

**C15** Har du noen gang i løpet av det siste året tenkt på å ta livet ditt, selv om du vet at du ikke vil gjøre det?

Aldri  Nesten aldri  Noen ganger  Mange ganger

**C16** Har du noen gang i løpet av det siste året vært i den situasjonen at du alvorlig har overveiet å ta livet ditt og til og med planlagt hvordan du i såfall skulle gjøre det?

Aldri  Nesten aldri  Noen ganger  Mange ganger

Hvis det har hendt, i hvilken grad mener du de følgende forhold var medvirkende til at det ble så vanskelig for deg?

|                                                       | Betydde ingenting        | Betydde litt             | Betydde endel            | Betydde ganske mye       | Betydde svært mye        |
|-------------------------------------------------------|--------------------------|--------------------------|--------------------------|--------------------------|--------------------------|
| <b>C17</b> Personlige forhold                         | <input type="checkbox"/> |
| <b>C18</b> Forhold til familie/ektefelle/partner      | <input type="checkbox"/> |
| <b>C19</b> Sosiale forhold                            | <input type="checkbox"/> |
| <b>C20</b> Problemer i forbindelse med veterinæryrket | <input type="checkbox"/> |
| <b>C21</b> Andre forhold                              | <input type="checkbox"/> |

**C22** Har du i løpet av det siste året forsøkt å ta ditt eget liv?

Aldri  Nesten aldri  Noen ganger  Mange ganger

Hvis det har hendt, i hvilken grad mener du de følgende forhold var medvirkende til at det ble så vanskelig for deg?

|                                                       | Betydde ingenting        | Betydde litt             | Betydde endel            | Betydde ganske mye       | Betydde svært mye        |
|-------------------------------------------------------|--------------------------|--------------------------|--------------------------|--------------------------|--------------------------|
| <b>C23</b> Personlige forhold                         | <input type="checkbox"/> |
| <b>C24</b> Forhold til familie/ektefelle/partner      | <input type="checkbox"/> |
| <b>C25</b> Sosiale forhold                            | <input type="checkbox"/> |
| <b>C26</b> Problemer i forbindelse med veterinæryrket | <input type="checkbox"/> |
| <b>C27</b> Andre forhold                              | <input type="checkbox"/> |

### Holdninger til aktiv dødshjelp

**Aktiv dødshjelp** er en samlebetegnelse på eutanasi og legeassistert selvmord. I noen europeiske land er aktiv dødshjelp tillatt, men i Norge er det ulovlig.

**Eutanasi** er en leges tilsiktede drap på en person ved å sette en sprøyte med dødbringende medikamenter etter at personen frivillig har bedt om det.

**Legassistert selvmord** er en leges hjelp til selvmord, ved å skaffe til veie medikamenter som personen kan innta selv.

| <b>Ta stilling til følgende påstander</b> |                                                                                                                            | Svært enig               | Litt enig                | Verken enig eller uenig  | Litt uenig               | Svært uenig              |
|-------------------------------------------|----------------------------------------------------------------------------------------------------------------------------|--------------------------|--------------------------|--------------------------|--------------------------|--------------------------|
| <b>C28</b>                                | Legeassistert selvmord bør tillates for personer som har en dødelig sykdom med kort forventet levetid.                     | <input type="checkbox"/> |
| <b>C29</b>                                | Eutanasi bør tillates for personer som har en dødelig sykdom med kort forventet levetid.                                   | <input type="checkbox"/> |
| <b>C30</b>                                | Aktiv dødshjelp bør tillates også for personer som har en uhelbredelig kronisk sykdom, men ikke er døende.                 | <input type="checkbox"/> |
| <b>C31</b>                                | Det finnes tilfeller der det kan være riktig/moralsk forsvarlig av legen å utføre aktiv dødshjelp, selv om det er ulovlig. | <input type="checkbox"/> |

### Holdninger til psykiske lidelser

| <b>Ta stilling til følgende påstander</b> |                                                                                                  | Svært enig               | Noe enig                 | Ikke sikker/ubestemt     | Noe uenig                | Svært uenig              |
|-------------------------------------------|--------------------------------------------------------------------------------------------------|--------------------------|--------------------------|--------------------------|--------------------------|--------------------------|
| <b>C32</b>                                | Behandling kan hjelpe mennesker med psykiske lidelser til å føre et normalt liv.                 | <input type="checkbox"/> |
| <b>C33</b>                                | Folk er generelt sett omsorgsfulle og positivt innstilte overfor personer med psykiske lidelser. | <input type="checkbox"/> |



## D Personlige egenskaper

### Ta stilling til følgende påstander

|           |                                                                                                          | Stemmer ikke             | Stemmer                  |
|-----------|----------------------------------------------------------------------------------------------------------|--------------------------|--------------------------|
| <b>D1</b> | Det er vanskelig for meg å stole på folk ettersom de så ofte vender seg mot meg eller lar meg i stikken  | <input type="checkbox"/> | <input type="checkbox"/> |
| <b>D2</b> | På en eller annen måte føler jeg at jeg ikke vet hvordan jeg skal oppføre meg sammen med andre mennesker | <input type="checkbox"/> | <input type="checkbox"/> |
| <b>D3</b> | Jeg opplever meg selv som helt ulik til ulike tidspunkter                                                | <input type="checkbox"/> | <input type="checkbox"/> |
| <b>D4</b> | Jeg føler meg ensom mesteparten av tiden                                                                 | <input type="checkbox"/> | <input type="checkbox"/> |
| <b>D5</b> | Folk som virker bra til å begynne med, ender ofte opp med å skuffe meg                                   | <input type="checkbox"/> | <input type="checkbox"/> |
| <b>D6</b> | Jeg føler det av og til som om jeg lever i en tåke                                                       | <input type="checkbox"/> | <input type="checkbox"/> |
| <b>D7</b> | Noen ganger føler jeg at jeg ikke er meg selv                                                            | <input type="checkbox"/> | <input type="checkbox"/> |
| <b>D8</b> | Folk kan oppfatte meg som uhøflig eller hensynsløs uten at jeg skjønner hvorfor                          | <input type="checkbox"/> | <input type="checkbox"/> |
| <b>D9</b> | Av og til får jeg rare tanker i hodet som jeg ikke er i stand til å få vekk                              | <input type="checkbox"/> | <input type="checkbox"/> |

### D10 Eventuelle kommentarer til spørreskjemaet?

## Supplementary File 2 – Description of sample for veterinarians with serious suicidal thoughts

| Variable                             | Range of values | Frequency (%) | Mean (SD)   |
|--------------------------------------|-----------------|---------------|-------------|
| <b>Gender</b>                        |                 |               |             |
| Female                               |                 | 108 (79.4%)   |             |
| Male                                 |                 | 28 (20.6 %)   |             |
| <b>Age</b>                           |                 |               |             |
| 20-30                                |                 | 16 (11.7 %)   |             |
| 31-40                                |                 | 47 (34.3 %)   |             |
| 41-50                                |                 | 41 (29.9 %)   |             |
| 51-60                                |                 | 21 (15.3 %)   |             |
| 61-70                                |                 | 10 (7.3 %)    |             |
| >70                                  |                 | 2 (1.5 %)     |             |
| <b>Marital status</b>                |                 |               |             |
| Married/cohabiting                   |                 | 82 (61.2 %)   |             |
| Single/divorced/widow(er)            |                 | 52 (38.8 %)   |             |
| <b>Life events</b>                   | 0-9             |               | 1.3 (1.4)   |
| <b>SCL-5</b>                         | 1-5             |               | 3.3 (1.0)   |
| <b>Reality weakness</b>              | 0-8             |               | 3.2 (2.1)   |
| <b>Alcohol to cope</b>               |                 |               |             |
| Never                                |                 | 73 (53.3 %)   |             |
| Any frequency                        |                 | 64 (46.7 %)   |             |
| <b>Main field of work</b>            |                 |               |             |
| Companion animal practice            |                 | 53 (39.6 %)   |             |
| Public administration                |                 | 21 (15.7 %)   |             |
| Mixed clinical practice              |                 | 13 (9.7 %)    |             |
| Academia/research                    |                 | 11 (8.2 %)    |             |
| Production animal practice           |                 | 11 (8.2 %)    |             |
| Aquaculture                          |                 | 6 (4.5 %)     |             |
| Equine practice                      |                 | 6 (4.5 %)     |             |
| Other                                |                 | 10 (7.5 %)    |             |
| Pensioner                            |                 | 3 (2.2 %)     |             |
| <b>Job stress</b>                    |                 |               |             |
| Emotional demands                    | 1 - 5           |               | 2.44 (0.84) |
| Work/life-balance                    | 1 - 5           |               | 3.22 (0.98) |
| Fear of complaints                   | 1 - 5           |               | 3.63 (1.11) |
| <b>Connection to work-life</b>       |                 |               |             |
| Employed                             |                 | 80 (58.4 %)   |             |
| Self-employed                        |                 | 37 (27.0 %)   |             |
| Other                                |                 | 11 (8.0 %)    |             |
| Two or more connections to work life |                 | 9 (6.6 %)     |             |
| <b>Position type</b>                 |                 |               |             |
| Permanent position                   |                 | 115 (87.8 %)  |             |
| Temporary position                   |                 | 6 (4.6 %)     |             |
| Temporary educational position       |                 | 2 (1.5 %)     |             |
| Other                                |                 | 8 (6.1 %)     |             |
| <b>Working full-time</b>             |                 | 101 (75.4 %)  |             |

1  
2  
3  
4  
5  
6  
7  
8  
9  
10  
11  
12  
13  
14  
15  
16  
17  
18  
19  
20  
21  
22  
23  
24  
25  
26  
27  
28  
29  
30  
31  
32  
33  
34  
35  
36  
37  
38  
39  
40  
41  
42  
43  
44  
45  
46  
47  
48  
49  
50  
51  
52  
53  
54  
55  
56  
57  
58  
59  
60

|                                                            |  |             |  |
|------------------------------------------------------------|--|-------------|--|
| <b>Frequency of working overtime (weekly or bi-weekly)</b> |  | 92 (71.9 %) |  |
|------------------------------------------------------------|--|-------------|--|

For peer review only

Supplementary File 3 – Additional analysis predictor model – Predictors of serious suicidal thoughts among veterinarians in Norway, without mental distress and reality weakness

|                                                                    | Crude   |                | Adjusted <sup>2</sup> |                |
|--------------------------------------------------------------------|---------|----------------|-----------------------|----------------|
|                                                                    | OR      | 95 % CI        | OR                    | 95 % CI        |
| Female                                                             | 1.55    | 0.999 to 2.401 | 0.88                  | 0.50 to 1.53   |
| Age                                                                | 0.93    | 0.86 to 1.00   | 1.02                  | 0.92 to 1.13   |
| Single                                                             | 2.38*** | 1.65 to 3.43   | 2.17***               | 1.44 to 3.27   |
| Negative life events <sup>1</sup>                                  | 1.78*** | 1.55 to 2.04   | 1.61***               | 1.39 to 1.86   |
| Alcohol to cope                                                    | 2.14*** | 1.51 to 3.04   | 1.52*                 | 1.02 to 2.27   |
| <b>Main field of work (ref. category= mixed clinical practice)</b> |         |                |                       |                |
| Companion animals                                                  | 1.38    | 0.74 to 2.57   | 1.17                  | 0.59 to 2.30   |
| Production animals                                                 | 1.28    | 0.56 to 2.94   | 1.72                  | 0.71 to 4.19   |
| Equine practice                                                    | 1.21    | 0.45 to 3.28   | 1.02                  | 0.34 to 3.04   |
| Aquaculture                                                        | 1.01    | 0.37 to 2.73   | 1.23                  | 0.39 to 3.89   |
| Public administration                                              | 1.08    | 0.53 to 2.20   | 1.47                  | 0.65 to 3.31   |
| Academia/research                                                  | 1.12    | 0.49 to 2.56   | 1.53                  | 0.59 to 4.01   |
| Other                                                              | 0.82    | 0.35 to 1.91   | 0.80                  | 0.29 to 2.17   |
| <b>Job stress</b>                                                  |         |                |                       |                |
| Emotional demands                                                  | 1.12*** | 1.08-1.16      | 1.05*                 | 1.003 to 1.104 |
| Work/life-balance                                                  | 1.13*** | 1.09-1.17      | 1.08**                | 1.03 to 1.13   |
| Fear of complaints                                                 | 1.18*** | 1.11-1.25      | 1.08*                 | 1.001 to 1.164 |

<sup>1</sup>The variable life events was entered into the model as a weighted variable ('Negative life events'), comprising the sum score of life events that was significant in a univariate model with the dependent variable.

\*P<0.05

\*\*P<0.01

\*\*\*P<0.001

<sup>2</sup>In the adjusted model, all listed variables were adjusted for, i.e. gender, age, civil status, negative life events, use of alcohol to cope, main field of work and the three job stress factors.

1  
2  
3  
4  
5  
6  
7  
8  
9  
10  
11  
12  
13  
14  
15  
16  
17  
18  
19  
20  
21  
22  
23  
24  
25  
26  
27  
28  
29  
30  
31  
32  
33  
34  
35  
36  
37  
38  
39  
40  
41  
42  
43  
44  
45  
46  
47  
48  
49  
50  
51  
52  
53  
54  
55  
56  
57  
58  
59  
60

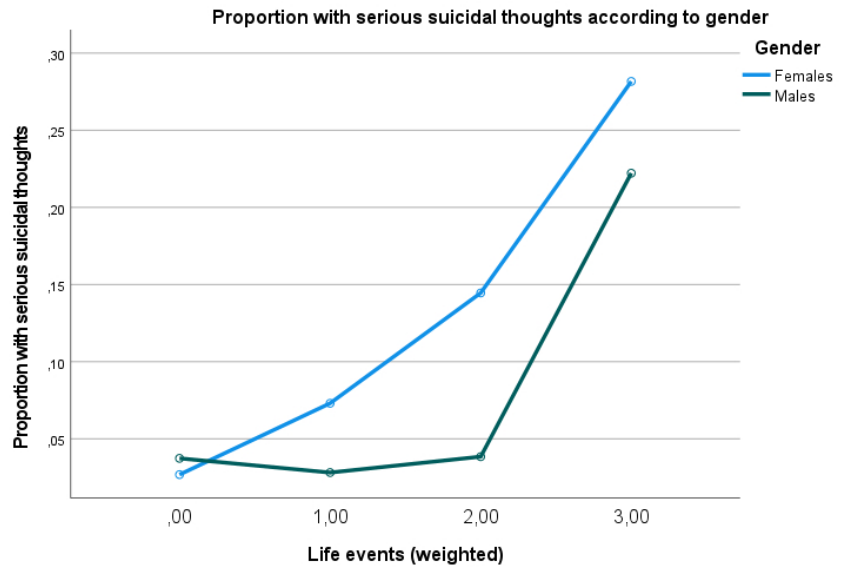

299x176mm (72 x 72 DPI)

1  
2  
3  
4  
5  
6  
7  
8  
9  
10  
11  
12  
13  
14  
15  
16  
17  
18  
19  
20  
21  
22  
23  
24  
25  
26  
27  
28  
29  
30  
31  
32  
33  
34  
35  
36  
37  
38  
39  
40  
41  
42  
43  
44  
45  
46  
47  
48  
49  
50  
51  
52  
53  
54  
55  
56  
57  
58  
59  
60

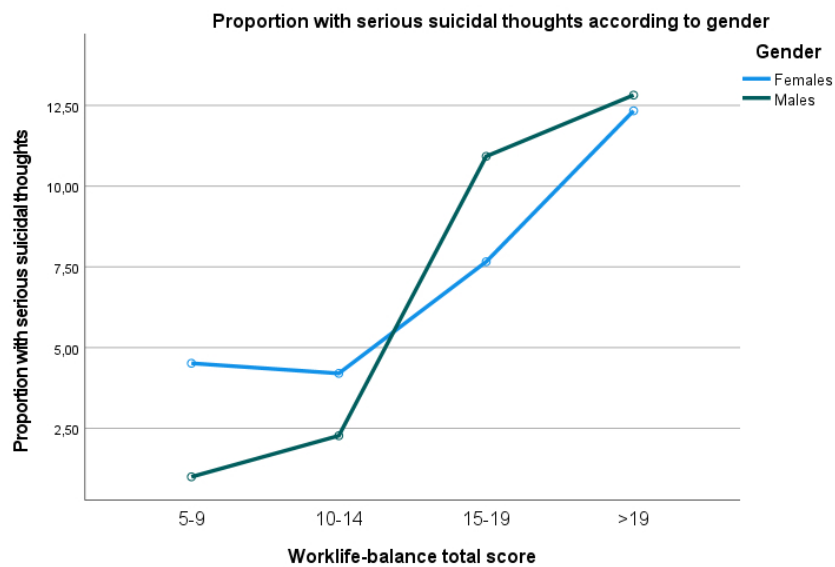

299x176mm (72 x 72 DPI)

**STROBE 2007 (v4) Statement—Checklist of items that should be included in reports of *cross-sectional studies***

| Section/Topic                | Item # | Recommendation                                                                                                                                                                       | Reported on page # |
|------------------------------|--------|--------------------------------------------------------------------------------------------------------------------------------------------------------------------------------------|--------------------|
| <b>Title and abstract</b>    | 1      | (a) Indicate the study's design with a commonly used term in the title or the abstract                                                                                               | 1                  |
|                              |        | (b) Provide in the abstract an informative and balanced summary of what was done and what was found                                                                                  | 2                  |
| <b>Introduction</b>          |        |                                                                                                                                                                                      |                    |
| Background/rationale         | 2      | Explain the scientific background and rationale for the investigation being reported                                                                                                 | 4-5                |
| Objectives                   | 3      | State specific objectives, including any prespecified hypotheses                                                                                                                     | 5                  |
| <b>Methods</b>               |        |                                                                                                                                                                                      |                    |
| Study design                 | 4      | Present key elements of study design early in the paper                                                                                                                              | 5                  |
| Setting                      | 5      | Describe the setting, locations, and relevant dates, including periods of recruitment, exposure, follow-up, and data collection                                                      | 5                  |
| Participants                 | 6      | (a) Give the eligibility criteria, and the sources and methods of selection of participants                                                                                          | 5                  |
| Variables                    | 7      | Clearly define all outcomes, exposures, predictors, potential confounders, and effect modifiers. Give diagnostic criteria, if applicable                                             | 6-8                |
| Data sources/<br>measurement | 8*     | For each variable of interest, give sources of data and details of methods of assessment (measurement). Describe comparability of assessment methods if there is more than one group | 6-8                |
| Bias                         | 9      | Describe any efforts to address potential sources of bias                                                                                                                            | 6                  |
| Study size                   | 10     | Explain how the study size was arrived at                                                                                                                                            | 6                  |
| Quantitative variables       | 11     | Explain how quantitative variables were handled in the analyses. If applicable, describe which groupings were chosen and why                                                         | 6-8                |
| Statistical methods          | 12     | (a) Describe all statistical methods, including those used to control for confounding                                                                                                | 8                  |
|                              |        | (b) Describe any methods used to examine subgroups and interactions                                                                                                                  | 8                  |
|                              |        | (c) Explain how missing data were addressed                                                                                                                                          | 8                  |
|                              |        | (d) If applicable, describe analytical methods taking account of sampling strategy                                                                                                   | NA                 |
|                              |        | (e) Describe any sensitivity analyses                                                                                                                                                | NA                 |
| <b>Results</b>               |        |                                                                                                                                                                                      |                    |

|                          |     |                                                                                                                                                                                                              |       |
|--------------------------|-----|--------------------------------------------------------------------------------------------------------------------------------------------------------------------------------------------------------------|-------|
| Participants             | 13* | (a) Report numbers of individuals at each stage of study—eg numbers potentially eligible, examined for eligibility, confirmed eligible, included in the study, completing follow-up, and analysed            | NA    |
|                          |     | (b) Give reasons for non-participation at each stage                                                                                                                                                         | NA    |
|                          |     | (c) Consider use of a flow diagram                                                                                                                                                                           | NA    |
| Descriptive data         | 14* | (a) Give characteristics of study participants (eg demographic, clinical, social) and information on exposures and potential confounders                                                                     | 9-11  |
|                          |     | (b) Indicate number of participants with missing data for each variable of interest                                                                                                                          | 9-14  |
| Outcome data             | 15* | Report numbers of outcome events or summary measures                                                                                                                                                         | 9-14  |
| Main results             | 16  | (a) Give unadjusted estimates and, if applicable, confounder-adjusted estimates and their precision (eg, 95% confidence interval). Make clear which confounders were adjusted for and why they were included | 13-14 |
|                          |     | (b) Report category boundaries when continuous variables were categorized                                                                                                                                    | NA    |
|                          |     | (c) If relevant, consider translating estimates of relative risk into absolute risk for a meaningful time period                                                                                             | NA    |
| Other analyses           | 17  | Report other analyses done—eg analyses of subgroups and interactions, and sensitivity analyses                                                                                                               | 13-14 |
| <b>Discussion</b>        |     |                                                                                                                                                                                                              |       |
| Key results              | 18  | Summarise key results with reference to study objectives                                                                                                                                                     | 15    |
| Limitations              | 19  | Discuss limitations of the study, taking into account sources of potential bias or imprecision. Discuss both direction and magnitude of any potential bias                                                   | 17    |
| Interpretation           | 20  | Give a cautious overall interpretation of results considering objectives, limitations, multiplicity of analyses, results from similar studies, and other relevant evidence                                   | 15-17 |
| Generalisability         | 21  | Discuss the generalisability (external validity) of the study results                                                                                                                                        | 17    |
| <b>Other information</b> |     |                                                                                                                                                                                                              |       |
| Funding                  | 22  | Give the source of funding and the role of the funders for the present study and, if applicable, for the original study on which the present article is based                                                | 19    |

\*Give information separately for cases and controls in case-control studies and, if applicable, for exposed and unexposed groups in cohort and cross-sectional studies.

**Note:** An Explanation and Elaboration article discusses each checklist item and gives methodological background and published examples of transparent reporting. The STROBE checklist is best used in conjunction with this article (freely available on the Web sites of PLoS Medicine at <http://www.plosmedicine.org/>, Annals of Internal Medicine at <http://www.annals.org/>, and Epidemiology at <http://www.epidem.com/>). Information on the STROBE Initiative is available at [www.strobe-statement.org](http://www.strobe-statement.org).



# BMJ Open

**Prevalence and individual and work-related factors associated with suicidal thoughts and behaviors among veterinarians in Norway: a cross-sectional, nationwide survey-based study (the NORVET study)**

|                                 |                                                                                                                                                                                                                                                                                                                                                           |
|---------------------------------|-----------------------------------------------------------------------------------------------------------------------------------------------------------------------------------------------------------------------------------------------------------------------------------------------------------------------------------------------------------|
| Journal:                        | <i>BMJ Open</i>                                                                                                                                                                                                                                                                                                                                           |
| Manuscript ID                   | bmjopen-2021-055827.R2                                                                                                                                                                                                                                                                                                                                    |
| Article Type:                   | Original research                                                                                                                                                                                                                                                                                                                                         |
| Date Submitted by the Author:   | 03-Dec-2021                                                                                                                                                                                                                                                                                                                                               |
| Complete List of Authors:       | Dalum, Helene; University of Oslo Faculty of Medicine, Department of Behavioural Medicine<br>Tyssen, Reidar; University of Oslo Faculty of Medicine, Department of Behavioural Sciences in Medicine<br>Hem, Erlend; University of Oslo Faculty of Medicine, Dept of the Behavioural Sciences in Medicine; Institute for Studies of the Medical Profession |
| <b>Primary Subject Heading</b>: | Epidemiology                                                                                                                                                                                                                                                                                                                                              |
| Secondary Subject Heading:      | Mental health, Occupational and environmental medicine                                                                                                                                                                                                                                                                                                    |
| Keywords:                       | EPIDEMIOLOGY, MENTAL HEALTH, OCCUPATIONAL & INDUSTRIAL MEDICINE, Suicide & self-harm < PSYCHIATRY                                                                                                                                                                                                                                                         |
|                                 |                                                                                                                                                                                                                                                                                                                                                           |

SCHOLARONE™  
Manuscripts



I, the Submitting Author has the right to grant and does grant on behalf of all authors of the Work (as defined in the below author licence), an exclusive licence and/or a non-exclusive licence for contributions from authors who are: i) UK Crown employees; ii) where BMJ has agreed a CC-BY licence shall apply, and/or iii) in accordance with the terms applicable for US Federal Government officers or employees acting as part of their official duties; on a worldwide, perpetual, irrevocable, royalty-free basis to BMJ Publishing Group Ltd ("BMJ") its licensees and where the relevant Journal is co-owned by BMJ to the co-owners of the Journal, to publish the Work in this journal and any other BMJ products and to exploit all rights, as set out in our [licence](#).

The Submitting Author accepts and understands that any supply made under these terms is made by BMJ to the Submitting Author unless you are acting as an employee on behalf of your employer or a postgraduate student of an affiliated institution which is paying any applicable article publishing charge ("APC") for Open Access articles. Where the Submitting Author wishes to make the Work available on an Open Access basis (and intends to pay the relevant APC), the terms of reuse of such Open Access shall be governed by a Creative Commons licence – details of these licences and which [Creative Commons](#) licence will apply to this Work are set out in our licence referred to above.

Other than as permitted in any relevant BMJ Author's Self Archiving Policies, I confirm this Work has not been accepted for publication elsewhere, is not being considered for publication elsewhere and does not duplicate material already published. I confirm all authors consent to publication of this Work and authorise the granting of this licence.

1  
2  
3 1 **Prevalence and individual and work-related factors associated with suicidal thoughts and**  
4 **behaviors among veterinarians in Norway: a cross-sectional, nationwide survey-based**  
5 **study (the NORVET study)**  
6  
7  
8  
9 4

10 5 **AUTHORS NAMES AND AFFILIATIONS**

11  
12 6 Helene Seljenes Dalum<sup>a</sup>, Reidar Tyssen<sup>a</sup>, Erlend Hem<sup>a, b</sup>.  
13  
14 7

15  
16 8 <sup>a</sup> Department of Behavioural Medicine, Institute of Basic Medical Sciences, Faculty of Medicine, University of  
17 9 Oslo, Norway.

18  
19 10 <sup>b</sup> Institute for Studies of the Medical Profession, Oslo, Norway.  
20  
21 11

22  
23 12  
24  
25 13 **CORRESPONDING AUTHOR**

26  
27  
28 14 Helene Seljenes Dalum  
29  
30 15

31  
32 16  
33  
34 17 Department of Behavioural Medicine

35  
36 18 Institute of Basic Medical Sciences

37  
38 19 Faculty of Medicine

39  
40 20 University of Oslo

41  
42 21 P.O. Box 1111 Blindern

43  
44 22 NO-0317 Oslo

45  
46 23 Norway  
47  
48 24

49 25 E-mail: [h.s.dalum@medisin.uio.no](mailto:h.s.dalum@medisin.uio.no)  
50  
51 26

52  
53 27 Word count: 4242 (excluding title page, abstract, tables and figures, acknowledgements, and  
54 28 references)  
55  
56 29

## 1 **ABSTRACT**

2 Objectives: Several studies have shown increased suicide rates among veterinarians. We investigated  
3 the self-reported prevalence of suicidal thoughts and behaviors and contributing and independent  
4 factors associated with suicidal thoughts and behaviors among veterinarians in Norway.

5 Design: Cross-sectional, nationwide survey.

6 Participants: 2596 veterinarians in Norway (response rate: 75 %).

7 Main outcome measure: Paykel's five-item questionnaire.

8 Results: In total, 27 % (n=682/2657) of veterinarians in Norway felt that life was not worth living  
9 during the last year, 5 % (n=139/2562) had serious suicidal thoughts, and 0.2 % (n=6/2537) had  
10 attempted suicide. Female veterinarians reported significantly higher prevalence of suicidal feelings  
11 and thoughts than males. For serious suicidal thoughts, women had nearly twice the prevalence as  
12 their male colleagues (6.2 % (n=108/1754) vs. 3.6 % (n=28/766), chi-square 6.5, p=0.011).  
13 Independent factors associated with serious suicidal thoughts were being single (OR = 1.76, 95 %CI  
14 1.13-2.72, p<0.05), negative life events (OR = 1.43, 95 %CI 1.22-1.68, p<0.001), and the presence of  
15 mental distress (OR = 2.75, 95 %CI 2.14-3.52, p<0.001). The veterinarians related their serious  
16 suicidal thoughts to work and personal problems, and a lesser degree to family, social, and other  
17 problems. Nearly twice as many women (53 %, n=57/108) as men (28 %, n=7/25) reported work  
18 problems as the most important contributing factor to their serious suicidal thoughts (chi-square:  
19 4.99, p=0.03). 4 % (n=6/139) reported work problems as the only factor of importance.

20  
21 Conclusions: Veterinarians in Norway have relatively high prevalence of suicidal feelings and  
22 thoughts, including serious suicidal thoughts. In multivariable analyses, the individual factors were  
23 more important than work-related ones, while work problems were the most reported contributing  
24 factor to serious suicidal thoughts by the veterinarians themselves. The role of gender and specific  
25 work-related factors should be further investigated to better understand the complexity of suicidal  
26 behavior among veterinarians.

27  
28 Keywords: Veterinarians, suicidal behavior, mental distress, personality traits.

29

30

1  
2  
3 1 **Strengths and limitations of this study**  
4

- 5  
6 2 • A major strength of our study is the high response rate (75 %), incorporating all authorized  
7 3 veterinarians nationwide, in all main fields of work.  
8  
9 4 • An extensive questionnaire was used, making multivariable analysis feasible.  
10  
11 5 • This is a cross-sectional study, which limits any conclusions regarding causality.  
12  
13 6 • The study possibly has limited generalizability, due to differences in organization of work life  
14 7 in other countries.  
15  
16  
17 8  
18  
19 9  
20  
21  
22 10  
23  
24 11  
25  
26  
27 12  
28  
29 13  
30  
31  
32 14  
33  
34 15  
35  
36  
37 16  
38  
39 17  
40  
41  
42 18  
43  
44  
45  
46  
47  
48  
49  
50  
51  
52  
53  
54  
55  
56  
57  
58  
59  
60

For peer review only

## 1 INTRODUCTION

2 Several studies have shown increased suicide rates among veterinarians. A review from 2010 found  
3 elevated suicide rates in all but one of the 15 studies published at the time. The suicide rate among  
4 veterinarians in the UK was three times that of the general population.<sup>1</sup> Recent studies have also  
5 indicated increased suicide rates in the profession.<sup>2-4</sup> Furthermore, three recent studies found a  
6 higher prevalence of suicidal ideation among veterinarians than the general population.<sup>5-7</sup>

7 There is little knowledge about the contribution of individual and work-related factors to suicidal  
8 behavior in veterinarians. In a systematic review from 2012, which included 52 papers, the authors  
9 highlighted the paucity of research that investigated the factors that contribute to suicide among  
10 veterinarians, and that many of the studies were of poor quality.<sup>8</sup> An interview study found that  
11 patient issues, responsibility, and poor work/life balance contributed to suicidal ideation among  
12 veterinarians.<sup>9</sup> It has been suggested that suicidal ideation among veterinarians is linked to the  
13 demanding nature of their work.<sup>10</sup> Dealing with bereaved clients (i.e. animal owners) has been shown  
14 to impact the mental health of veterinarians,<sup>11</sup> and attachment loss and trauma can contribute to  
15 both depression and suicidality.<sup>12</sup> Preoccupation, self-doubt, conflicting responsibilities (care of  
16 animals/human clients/financial demands), and insufficient support were important factors of job  
17 stress among veterinarians in a qualitative study.<sup>13</sup> When searching for independent work-related  
18 factors associated with suicidal thoughts and behavior, it is important to control for known individual  
19 factors. These include having no partner,<sup>14 15</sup> negative life events,<sup>16</sup> anxiety symptoms, depressive  
20 symptoms,<sup>15 17</sup> personality problems,<sup>18 19</sup> and the problematic use of alcohol.<sup>17</sup>

21 The gender balance among veterinarians has changed significantly over the past decades, from 66 %  
22 male veterinary students in Norway in 1980 to only 16 % in 2020 (personal communication, Ann  
23 Kristin Egeli, Norwegian University of Life Sciences, June 22<sup>nd</sup>, 2021). As of June 2021, 69 % of  
24 veterinarians holding authorization in Norway were women (personal communication, Bente N.  
25 Reve, The Norwegian Food Safety Authority, July 12<sup>th</sup>, 2021). The gender shift in the profession  
26 corresponds to that in several other countries.<sup>20-22</sup> Studies have shown that being female and of  
27 younger age increases the risk of serious psychological distress as a veterinarian.<sup>7 8 11</sup> The prevalence  
28 of psychological distress, such as anxiety symptoms and depressive symptoms, is also higher among  
29 female veterinarians compared to that among male veterinarians.<sup>5 11 23</sup>

30 Furthermore, there is substantial evidence that certain personality traits may increase the risk of  
31 suicide.<sup>19 24</sup> Reality weakness is a deviant personality trait including chronic illusions, paranoid traits,  
32 identity-insecurity, and relational problems.<sup>25</sup> This trait has demonstrated predictive validity in

1  
2  
3 1 Norwegian medical doctors regarding the aggravation of suicidal ideation.<sup>18</sup> It is a significant  
4  
5 2 predictor of serious suicidal ideation in other occupational groups as well.<sup>26 27</sup>  
6

7  
8 3 Over the last decades, the veterinary profession has turned from agriculture and food-producing  
9  
10 4 animal medicine to an increasing proportion working with companion animals. Two US studies have  
11  
12 5 found a higher suicide rate among companion animal practitioners compared to other  
13  
14 6 specializations,<sup>3 28</sup> and it has been shown that veterinarians in this field more often reported suicidal  
15  
16 7 thoughts than other veterinarians.<sup>29</sup> Thus, attention is required in the different fields of veterinary  
17  
18 8 medicine.

19  
20 9 Few studies have investigated the direct association and contribution of individual and work-related  
21  
22 10 factors to suicidal thoughts and behavior. Therefore, we investigated the following questions:

- 23  
24 11 (1) What is the prevalence of suicidal thoughts and behavior among veterinarians in Norway, and  
25  
26 12 are there any gender differences?  
27  
28 13 (2) What do veterinarians in Norway regard as contributing factors to their serious suicidal  
29  
30 14 thoughts?  
31  
32 15 (3) What are the independent individual and work-related predictors for serious suicidal thoughts?  
33  
34 16

## 35 17 **METHODS**

### 36 18 **Sample**

37  
38 19 The sample included all veterinarians in Norway, holding valid authorization as of May 2020 (n =  
39  
40 20 4256), according to information retrieved from the Norwegian Food Safety Authority. We excluded  
41  
42 21 veterinarians for the following reasons: no residential address in Norway (n = 527), current address  
43  
44 22 unknown (n = 196), those working abroad (n = 62) and those who were deceased (n = 7). This  
45  
46 23 resulted in an eligible sample of 3464 veterinarians.  
47  
48 24

### 49 25 **Questionnaire**

50  
51 26 A 12-page questionnaire, an information sheet and a prepaid postage envelope were distributed by  
52  
53 27 mail in November 2020. The information sheet included contact information of a psychiatrist in the  
54  
55 28 research group and the colleague-support network of the Norwegian Veterinary Association. Two  
56  
57 29 reminders were sent in January and February 2021, respectively. Five gift cards from a sports shop  
58  
59 30 were placed in a drawing for respondents as incentives to increase the response rate. An external  
60  
31 company managed both the data collection and prize awards. Respondents returned their

1  
2  
3 1 questionnaires in a sealed envelope, and the identities of the respondents were unknown to the  
4 researchers throughout. The complete questionnaire in Norwegian can be found as a supplementary  
5 file ("Supplementary file 1 – Full questionnaire NORVET.pdf").  
6  
7

8  
9 4 The Regional Committee for Medical and Health Research Ethics South-East C (132704), and the  
10 Norwegian Centre for Research Data (674793) approved this study.  
11  
12

### 13 6 14 15 7 **Instruments – dependent variable**

16  
17  
18 8 Paykel's questionnaire about suicidal thoughts and attempts was the dependent variable in this  
19 study.<sup>30</sup> It is a five-item instrument developed to study suicidal feelings in the general population.  
20 The items represent increasing severity, from unspecific suicidal feelings to actual suicide attempt.  
21 Previous studies on several professions in Norway have validated this instrument.<sup>14 15 26 27 31</sup> The five  
22 items have the following wording: 1. 'Have you ever felt that life was not worth living?'  
23 2. 'Have you ever wished you were dead – for instance, that you could go to sleep and not wake up?'  
24 3. 'Have you ever thought of taking your life, even if you would not really do it?' 4. 'Have you ever  
25 reached the point where you seriously considered taking your life, or perhaps made plans how you  
26 would go about doing it?' 5. 'Have you ever made an attempt to take your life?' Question four was  
27 slightly altered in the Norwegian translation, to: "... and even made plans...", reinforcing the  
28 seriousness in this statement.<sup>15</sup> The responses to each question were never, hardly ever, sometimes  
29 or often. Responses were dichotomized into never (0) and any frequency (1) according to Paykel's  
30 original work. The preceding year's suicidal thoughts and attempts were investigated in the present  
31 study. For questions 4. and 5., an additional question was asked: 'To what extent do you think the  
32 following factors contributed to your consideration of taking your life', with the following factors: 1.  
33 Personal problems, 2. Family problems, 3. Social problems, 4. Work problems, 5. Other problems.  
34 Each of the factors had five response categories from 'not at all' (1) to 'very much' (5). For the  
35 regression analyses, Paykel item number four was used (serious suicidal thoughts) as the outcome  
36 variable, dichotomized as specified above.  
37  
38  
39  
40  
41  
42  
43  
44  
45  
46  
47  
48  
49  
50  
51  
52  
53

### 54 28 **Independent variables – individual factors**

55 29 The personality trait *reality weakness* was measured using the nine-item reality weakness dimension  
56 of Torgersen's Basic Character Inventory (BCI).<sup>32</sup> Each item had a dichotomous ('agree'/'do not  
57 agree') response, with a total sum score from 0 to 9. BCI-Reality weakness is an original, deviant trait  
58 related to perceptions and ideations on the borderline between reality and fantasy; this dimension  
59  
60



1 also measures chronic illusions, paranoid traits, and traits related to severe personality disorders.<sup>25 33</sup>  
2 Examples of items are: 'I feel lonely most of the time' and 'Sometimes I feel I am not myself'. This  
3 measure has previously been validated to predict emotional disturbance, such as serious suicidal  
4 thoughts, severe depression, and lack of help-seeking among physicians.<sup>33</sup>

5 The Norwegian Centre for Research Data claimed the use of age intervals to keep the data as  
6 unidentifiable as possible. Therefore, *age* was reported in the following intervals: 20-25, 26-30 (...) up  
7 to 66-70 and >70 years. In this study, *marital status* was dichotomized into married/cohabitant and  
8 single/divorced/separated/widow(er) (coded 0 and 1, respectively).

9 *Life events during the last 12 months* was measured by 17 items, previously used by among others,  
10 Tysse et al.,<sup>15 34</sup> and adapted to veterinarians. The adaptations were mainly linguistic and included  
11 the removal of items specific to physicians. Examples of life events were 'serious disease or accident',  
12 'death of a relative/close friend' and 'serious economic problems'. All items were coded as 0 or 1,  
13 and the variable comprised the sum score of all items. To test the effects on serious suicidal  
14 thoughts, we used the weighted total score of all items significantly associated with such thoughts.

15 *Mental distress (anxiety symptoms and depressive symptoms)* in the last 14 days was measured using  
16 SCL-5, a five-item version of the Symptom Check List-25.<sup>35</sup> This five-item version is based on a factor  
17 analysis by Tambs and Moum,<sup>36</sup> and contains questions about how much one is bothered by the  
18 following: 1. 'Feeling fearful', 2. 'Nervousness or shakiness inside', 3. 'Feeling hopeless about the  
19 future', 4. 'Feeling blue', 5. 'Worrying too much about things'. Each item was measured on a scale  
20 from 1 to 5 from 'not at all' to 'very much'. The sum score is used to indicate the level of mental  
21 distress. This version has been validated in medical students and physicians in Norway.<sup>37 38</sup>

22 *Alcohol to cope* was measured by a single item originally used in national surveys in the USA.<sup>39</sup> The  
23 item is: 'When you feel worried, tense, or nervous, do you ever drink alcoholic beverages to help you  
24 handle things?' The alternatives were 'never', 'seldom', 'now and then' and 'often'. In the analyses,  
25 responses were dichotomized into 0 'Never' and 1 'Any frequency', as validated in previous  
26 Norwegian studies.<sup>40-42</sup> The reason for dichotomizing the response was for cultural purposes and we  
27 wanted a clear distinction between drinking to cope with tension or not, as accounted for in detail  
28 elsewhere.<sup>40</sup>

29

30

31

## 1 **Independent variables – work-related factors**

2 *The main fields of work* were reported as ‘companion animal practice’, ‘production animal practice’,  
3 ‘mixed clinical practice’, ‘equine practice’, ‘aquaculture’, ‘public administration’,  
4 ‘academia/researcher’, ‘pensioners’ and ‘others’. Those who classified themselves as pensioners  
5 were excluded from the logistic regression analyses, because work-related factors were included in  
6 the model.

7 *Job stress* was measured by a modified version of Cooper's Job Stress Questionnaire,<sup>43 44</sup> with minor  
8 adaptations to veterinarians' work conditions. These adaptations were mainly linguistic, but some  
9 items specific to the veterinary profession were added (as ‘cross pressure between economy/animal  
10 welfare/ethics’). The veterinarians were asked how much different situations/factors made them  
11 stressed, with the response alternatives being reported by a five-point Likert type rating scale  
12 ranging from no stress at all (1) to a source of extreme stress (5). A factor analysis (principal  
13 component with varimax rotation, including scree plot evaluation) identified three job stress factors:  
14 *emotional demands*, *work/life balance*, and *fear of complaints/criticism*. The first factor, *emotional*  
15 *demands* (Cronbach's alpha=0.87), contained six items: 1. ‘Daily contact with dying and critically ill  
16 animals’, 2. ‘Taking care of terminally ill animals and their owners’, 3. ‘Taking care of suffering  
17 animals’, 4. ‘Requests about animals from friends and family’, 5. ‘Requests about animals from  
18 relatives’, and 6. ‘Emotional involvement with patients’. The second factor, *work/life balance*  
19 (Cronbach's alpha=0.86), consisted of five items: 1. ‘Work affects family life’, 2. ‘Managing a balance  
20 between work and personal life’, 3. ‘Work affects social life’, 4. ‘Time pressure’, and 5. ‘Interruptions  
21 and nagging at work’. The third factor, *fear of complaints/criticism* (Cronbach's alpha=0.88),  
22 consisted of three items: 1. ‘Worries about complaints from animal owners/customers’, 2. ‘Animal  
23 owners/customers do not appreciate your work’, and 3. ‘Dealing with challenging animal  
24 owners/customers’.

## 26 **Statistical analysis**

27 SPSS version 27 and StataSE 16 were used for the statistical analyses. Table analyses and the  $\chi^2$  test  
28 were used to test for gender differences. Controlled effects were reported as odds ratios, analyzed  
29 through hierarchical logistic regression. The following variables were examined as possible predictors  
30 of serious suicidal thoughts: gender, age, civil status, negative life events, mental distress, reality  
31 weakness, use of alcohol to cope, main field of work, and job stress. Initially all independent variables  
32 were analyzed bivariately with the dependent variable (crude ORs). In the adjusted model, all  
33 independent variables were entered simultaneously in a logistic regression (adjusted ORs). In order

1  
2  
3 1 to study possible mediating or confounding effects of mental distress and reality weakness, we  
4 2 performed an additional multivariable regression leaving out the variables mental distress and reality  
5 3 weakness.  $p < 0.05$  was considered statistically significant for all analyses. To investigate gender-  
6 4 specific effects, we entered two-way interaction terms between gender and the other independent  
7 5 variables in separate analyses with the main effect included in the equations. Missing values were  
8 6 coded as 'system missing'.  
9  
10  
11  
12  
13  
14  
15

## 16 8 **Patient and Public Involvement**

17  
18 9 The Norwegian Veterinary Association appointed a reference group for this project consisting of  
19 10 seven veterinarians from each of the professional subgroups: Small Animal-, Equine-, Production  
20 11 Animal and Aquaculture Veterinary Association, the Association of Veterinarians in Public Health  
21 12 Medicine, the Veterinary Students' Association and the Pensioners' Association. These veterinarians  
22 13 contributed with valuable input both to the design of the questionnaire, hypotheses, and aims of the  
23 14 present study.  
24  
25  
26  
27  
28  
29  
30  
31

## 32 16 **RESULTS**

### 33 17 **Demographics**

34  
35  
36 18 Of the 3464 eligible participants, we received 2596 responses, resulting in a response rate of 75 %.  
37  
38 19 The most frequently reported age category was 41 – 45 years of age. The age varied between  
39 20 genders, with a higher proportion of younger women, and the majority of men were older than 50  
40 21 years. In total, 69 % were female and 31 % male (Table 1), which is an accurate reflection of the  
41 22 actual gender distribution of veterinarians in Norway.  
42  
43  
44  
45  
46  
47  
48  
49  
50  
51  
52  
53  
54  
55  
56  
57  
58  
59  
60

1 **Table 1 – Description of study population**

|                           | Range of values | Frequency (%) | Mean (SD)   |
|---------------------------|-----------------|---------------|-------------|
| <b>Gender</b>             |                 |               |             |
| Female                    | ..              | 1776 (69.6 %) | ..          |
| Male                      | ..              | 776 (30.4 %)  | ..          |
| <b>Age</b>                |                 |               |             |
| 20-30                     | ..              | 274 (10.8 %)  | ..          |
| 31-40                     | ..              | 697 (27.4 %)  | ..          |
| 41-50                     | ..              | 667 (26.2 %)  | ..          |
| 51-60                     | ..              | 432 (16.9 %)  | ..          |
| 61-70                     | ..              | 318 (12.5 %)  | ..          |
| >70                       | ..              | 159 (6.2 %)   | ..          |
| <b>Marital status</b>     |                 |               |             |
| Married/cohabiting        | ..              | 1962 (78 %)   | ..          |
| Single/divorced/widow(er) | ..              | 552 (22 %)    | ..          |
| <b>Life events</b>        | 0-9             | ..            | 0.54 (0.89) |
| <b>SCL-5</b>              | 1-5             | ..            | 2.00 (0.98) |
| <b>Reality weakness</b>   | 0-9             | ..            | 1.38 (1.85) |
| <b>Alcohol to cope</b>    |                 |               |             |
| Never                     | ..              | 1769 (71 %)   | ..          |
| Any frequency             | ..              | 722 (29 %)    | ..          |
| <b>Main field of work</b> |                 |               |             |
| Companion animal practice | ..              | 802 (31.8 %)  | ..          |
| Public administration     | ..              | 402 (15.9 %)  | ..          |
| Mixed clinical practice   | ..              | 268 (10.6 %)  | ..          |

|                                                            |     |               |             |
|------------------------------------------------------------|-----|---------------|-------------|
| Academia/research                                          | ..  | 202 (8.0 %)   | ..          |
| Production animal practice                                 | ..  | 177 (7.0 %)   | ..          |
| Aquaculture                                                | ..  | 121 (4.8 %)   | ..          |
| Equine practice                                            | ..  | 102 (4.0 %)   | ..          |
| Other                                                      | ..  | 250 (9.9 %)   | ..          |
| Pensioner                                                  | ..  | 198 (7.9 %)   | ..          |
| <b>Job stress</b>                                          |     |               |             |
| Emotional demands                                          | 1-5 | ..            | 1.98 (0.79) |
| Work/life balance                                          | 1-5 | ..            | 2.67 (0.97) |
| Fear of complaints                                         | 1-5 | ..            | 3.06 (1.17) |
| <b>Connection to work-life</b>                             |     |               |             |
| Employed                                                   | ..  | 1561 (63.0 %) | ..          |
| Self-employed                                              | ..  | 573 (23.1 %)  | ..          |
| Other                                                      | ..  | 217 (8.8 %)   | ..          |
| Two or more connections to work life                       | ..  | 127 (5.1 %)   | ..          |
| <b>Position type</b>                                       |     |               | ..          |
| Permanent position                                         | ..  | 2023 (88.1 %) | ..          |
| Temporary position                                         | ..  | 70 (3 %)      | ..          |
| Temporary educational position                             | ..  | 50 (2.2 %)    | ..          |
| Other                                                      | ..  | 153 (6.7 %)   | ..          |
| <b>Working full-time</b>                                   | ..  | 1922 (81.1 %) | ..          |
| <b>Frequency of working overtime (weekly or bi-weekly)</b> | ..  | 1550 (67.9 %) | ..          |

1

2

1  
2  
3 1  
4  
5  
6 2**Prevalence of suicidal thoughts and behavior during the last year**

7  
8 3 27 % of the veterinarians reported that they felt that life was not worth living, and 20 % had thought  
9  
10 4 of suicide, even though they knew that they would not do it. 5 % reported that they had serious  
11 5 suicidal thoughts, and six persons (0.2 %) had attempted suicide (Table 2). Female veterinarians  
12 6 reported significantly higher prevalence of suicidal feelings and thoughts than male colleagues did.  
13 7 This gender difference remained throughout all items; for serious suicidal thoughts; women had  
14 8 nearly twice the prevalence as their male colleagues (6.2 % vs. 3.6 %, chi-square: 6.5, p=0.011).  
15 9 Economic problems (OR = 10.88, 95 % CI 5.20-22.78, p<0.001) were the most significant negative life  
16 10 event for veterinarians. Descriptive statistics for the veterinarians with serious suicidal thoughts is  
17 11 included as a supplementary file (Supplementary File 2 – Descriptives for veterinarians with serious  
18 12 suicidal thoughts).

13  
14

14 **Table 2 – Prevalence of suicidal feelings and thoughts among veterinarians in Norway according to**  
15 **gender**

|                                          | All          | Men         | Women       | Total n<br>for each<br>item | $\chi^2$ and p-<br>value |
|------------------------------------------|--------------|-------------|-------------|-----------------------------|--------------------------|
| 1. Felt life was not worth living        | 682 (26.6 %) | 148 (19.3%) | 522 (29.7%) | 2567                        | 29.4,<br>p<0.001         |
| 2. Wished you were dead                  | 498 (19.4 %) | 96 (12.5%)  | 394 (22.5%) | 2565                        | 33.6,<br>p<0.001         |
| 3. Thoughts of taking life               | 503 (19.6 %) | 102 (13.3%) | 391 (22.3%) | 2565                        | 26.9,<br>p<0.001         |
| 4. Seriously considered taking your life | 139 (5.4 %)  | 28 (3.6%)   | 108 (6.2%)  | 2562                        | 6.5,<br>p=0.011          |
| 5. Made a suicide attempt                | 6 (0.2 %)    | 1 (0.1%)    | 5 (0.3%)    | 2537                        | NA                       |

16 Not all veterinarians reported gender (n=2554). This leads to a difference in total sum for men + women compared to "all."

17

## 1 Self-reported factors contributing to serious suicidal thoughts

2 Among the veterinarians reporting serious suicidal thoughts (n=139), work problems were the most  
 3 frequently reported contributing factor (48 %), followed by personal problems (37 %) (Table 3). The  
 4 only significant gender difference was regarding work problems, with nearly twice as many women  
 5 (53 %) as men (28 %) reporting work problems as the most important contributing factor to their  
 6 serious suicidal thoughts (chi-square: 4.99, p=0.03, Fisher's exact), and 4.3 % reported work problems  
 7 as the only factor of importance.

8 **Table 3 – Self-reported contributing factors to serious suicidal thoughts among veterinarians in**  
 9 **Norway**

|                   | Not at all + A little + Somewhat |               |               | Quite a bit + Very much |              |               | Total n |
|-------------------|----------------------------------|---------------|---------------|-------------------------|--------------|---------------|---------|
|                   | N (%)                            |               |               | N (%)                   |              |               |         |
|                   | Total                            | Men           | Women         | Total                   | Men          | Women         |         |
| Personal problems | 84<br>(63.2%)                    | 17<br>(65.4%) | 67<br>(63.8%) | 49<br>(36.8%)           | 9<br>(34.6%) | 38<br>(36.2%) | 133     |
| Family problems   | 91<br>(68.4%)                    | 19<br>(79.2%) | 72<br>(67.9%) | 42<br>(31.6%)           | 5<br>(20.8%) | 34<br>(32.1%) | 133     |
| Social problems   | 108<br>(81.2%)                   | 21<br>(84.0%) | 86<br>(81.1%) | 25<br>(18.8%)           | 4<br>(16.0%) | 20<br>(18.9%) | 133     |
| Work problems     | 70<br>(51.9%)                    | 18<br>(72.0%) | 51<br>(47.2%) | 65<br>(48.1%)           | 7<br>(28.0%) | 57<br>(52.8%) | 135     |
| Other problems    | 90<br>(72.6%)                    | 20<br>(83.3%) | 70<br>(71.4%) | 34<br>(27.4%)           | 4<br>(16.7%) | 28<br>(28.6%) | 124     |

10 Item four of Paykel's questionnaire was answered by n= 2562 veterinarians (men=766, women=1754). The question was  
 11 answered positively by n=139 (see Table 1).

## 13 Predictors of serious suicidal thoughts

1 Being single, negative life events, mental distress, reality weakness, use of alcohol to cope, and the  
 2 three job stress factors were significant unadjusted (crude) predictors (Table 4). In the adjusted  
 3 model, the significant predictors were being single, negative life events, and mental distress. There  
 4 was no gender effect. No significant effect was found within the different fields of work or any of the  
 5 three job stress factors in the adjusted model (Table 4).

6 Post hoc, and in order to investigate any confounding or mediating effect of mental distress and  
 7 reality weakness on the job stress-variables, we conducted an additional multivariable analysis.  
 8 When processing the individual and work-related factors without the two variables of reality  
 9 weakness and mental distress, the significant predictors were: being single, negative life events, use  
 10 of alcohol to cope with tension, and all three job stress factors. The results from the additional  
 11 analysis can be found in the supplementary material (Supplementary File 3 – Additional analysis  
 12 predictor model).

14 **Table 4 – Predictors of serious suicidal thoughts among veterinarians in Norway**

|                                                                    | Crude   |                | Adjusted <sup>2</sup> |                |
|--------------------------------------------------------------------|---------|----------------|-----------------------|----------------|
|                                                                    | OR      | 95 % CI        | OR                    | 95 % CI        |
| Female                                                             | 1.55    | 0.999 to 2.401 | 0.88                  | 0.49 to 1.57   |
| Age                                                                | 0.93    | 0.86 to 1.00   | 1.11                  | 0.996 to 1.235 |
| Single                                                             | 2.38*** | 1.65 to 3.43   | 1.76*                 | 1.13 to 2.72   |
| Negative life events <sup>1</sup>                                  | 1.78*** | 1.55 to 2.04   | 1.43***               | 1.22 to 1.68   |
| SCL-5                                                              | 3.08*** | 2.61 to 3.64   | 2.75***               | 2.14 to 3.52   |
| Reality weakness <sup>3</sup>                                      | 1.47*** | 1.37 to 1.59   | 1.10                  | 0.99 to 1.22   |
| Alcohol to cope                                                    | 2.14*** | 1.51 to 3.04   | 1.09                  | 0.72 to 1.67   |
| <b>Main field of work (ref. category= mixed clinical practice)</b> |         |                |                       |                |
| Companion animals                                                  | 1.38    | 0.74 to 2.57   | 1.01                  | 0.50 to 2.06   |
| Production animals                                                 | 1.28    | 0.56 to 2.94   | 1.97                  | 0.77 to 5.05   |
| Equine practice                                                    | 1.21    | 0.45 to 3.28   | 1.02                  | 0.32 to 3.26   |
| Aquaculture                                                        | 1.01    | 0.37 to 2.73   | 1.07                  | 0.32 to 3.61   |
| Public administration                                              | 1.08    | 0.53 to 2.20   | 1.15                  | 0.49 to 2.71   |
| Academia/research                                                  | 1.12    | 0.49 to 2.56   | 1.07                  | 0.39 to 2.99   |
| Other                                                              | 0.82    | 0.35 to 1.91   | 0.70                  | 0.24 to 2.02   |
| <b>Job stress</b>                                                  |         |                |                       |                |
| Emotional demands                                                  | 1.12*** | 1.08-1.16      | 1.02                  | 0.97 to 1.07   |
| Work/life balance                                                  | 1.13*** | 1.09-1.17      | 1.00                  | 0.95 to 1.05   |
| Fear of complaints                                                 | 1.18*** | 1.11-1.25      | 1.01                  | 0.93 to 1.09   |

<sup>1</sup>The variable life events was entered into the model as a weighted variable ('Negative life events'), comprising the sum score of life events that was significant in a univariate model with the dependent variable.

\*P<0.05

\*\*P<0.01

\*\*\*P<0.001



<sup>2</sup>In the adjusted model, all listed variables were simultaneously entered in the model, i.e., gender, age, civil status, negative life events, SCL-5, reality weakness, use of alcohol to cope, main field of work and the three job stress factors.

<sup>3</sup>There was a high correlation between SCL-5 and reality weakness (Pearson's  $R=0.6$ ).

We found significant interactions between gender and negative life events (OR=0.65, 95 % CI 0.46 – 0.92,  $p=0.015$ ), with clearly steeper gradients for females. There was also an interaction between gender and work/life balance (OR=1.11, 95 %CI 1.01 – 1.22,  $p=0.026$ ), and the increase in suicidal thoughts with higher work/life imbalance was stronger among males than among females. A figure illustrating the interaction analysis can be found as a Supplementary file (Supplementary file 4-1 and Supplementary File 4-2).

## DISCUSSION

A main finding of this study was that 27 % of the veterinarians in Norway felt that life was not worth living during the last year, 5 % had serious suicidal thoughts, and 0.2 % had attempted suicide. Female veterinarians reported significantly more suicidal feelings and thoughts than their male colleagues. The veterinarians considered their serious suicidal thoughts mainly as related to work and personal problems, and to a lesser degree, family, social, and other problems. Independent factors associated with serious suicidal thoughts were: being single, negative life events, and mental distress.

Furthermore, veterinarians reported both suicidal feelings and serious suicidal thoughts more frequently (26.6 % and 5.4 %, respectively) than physicians (16.6 % and 2.6 %, respectively),<sup>14</sup> and police (8.9 % and 1.7 %, respectively)<sup>26</sup> in Norway. Furthermore, veterinarians, especially females, regarded work problems as the most important contributing factor to their suicidal thoughts. A previous study found that physicians most frequently regarded personal and family problems as the most important factors for serious suicidal thoughts,<sup>14</sup> which may suggest that self-reported work factors play a more important role in suicidal thoughts in veterinarians than in physicians. Regarding suicide attempts, veterinarians had a prevalence (0.2%) comparable to those of physicians and police (0.3% and 0.1%, respectively).<sup>14 26</sup>

The relatively high prevalence of suicidal feelings and thoughts concurs with findings among veterinarians in other countries. Two studies used "National Survey of Psychiatric Morbidity",<sup>5 45</sup> an item originally sourced from Paykel's instrument.<sup>30</sup> These items use the same wording for items one

1 and three, which makes comparison possible. The prevalence of suicidal feelings in the past year  
2 among veterinarians in Norway was slightly higher (26.6%) than among those in the UK (23.0%)<sup>45</sup> and  
3 Canada (17.9%),<sup>5</sup> whereas suicidal thoughts in the past year were at the same level (19.6%, 21.3%,  
4 and 19.4%, respectively). However, veterinarians in Canada reported higher prevalence (17.0%) of  
5 serious suicidal thoughts than in Norway (5.4%), which is probably due to the reporting period for  
6 serious suicidal thoughts in the Canadian survey being 'since the start of veterinary education', while  
7 in the present study, the reporting period was the preceding year.

8 Moreover, like female physicians,<sup>14</sup> female veterinarians had higher levels of suicidal feelings and  
9 thoughts than their male colleagues. Gender differences were also present in the self-reported  
10 contributing factors, as female veterinarians reported work problems more frequently than men.  
11 According to our own results and those of others',<sup>14</sup> work problems are more often considered a  
12 contributing factor to suicidal thoughts by veterinarians than by physicians. The perceived impact of  
13 work-factors on serious suicidal thoughts may be partly influenced by the fact that veterinarians in  
14 Norway have less undergraduate training in communication, psychology and coping skills, and  
15 experience more professional isolation. Additionally, animal health care poses a cost issue (in  
16 Norway, human health care costs are funded by tax revenues), resulting in cross pressure for  
17 veterinarians at the intersection of animal welfare, costs, and ethics. Conflicting responsibilities in  
18 the veterinary profession may be an overarching theme contributing to significant stress among  
19 veterinarians.<sup>13</sup>

20 Today, approximately 70 % of veterinarians in Norway are female, and this proportion is expected to  
21 increase. There was no significant effect of gender in the adjusted model. This may be because age  
22 was highly correlated with the female gender. Being single and experiencing negative life events  
23 predicted serious suicidal thoughts in the present study (76 % and 43 % higher odds, respectively).  
24 These findings are consistent with studies on physicians and others.<sup>14 15 18</sup> In contrast to physicians,  
25 where family and relationship issues were the most significant negative life events,<sup>14</sup> economic  
26 problems were the most significant negative life event for veterinarians. This also supports the  
27 hypothesis that there are other factors associated with suicidal thoughts among veterinarians than  
28 with physicians and that economic concerns are more important with veterinarians. In an Australian  
29 qualitative study, veterinarians were asked what they would do if they could change something in  
30 the profession, and the most common response was to remove money from the decision-making  
31 process.<sup>13</sup> Contrary to the findings in a recent review,<sup>16</sup> experiencing negative life events had a  
32 greater impact on serious suicidal thoughts among women than among men. Furthermore, work/life  
33 balance had a greater impact on serious suicidal thoughts among men than among women. These  
34 findings warrant further research.

1  
2  
3 1 Bivariately, drinking to cope was a significant predictor for serious suicidal thoughts, but not in the  
4 2 multivariable model. Previous research indicates that alcohol use is a risk factor for suicidal  
5 3 behavior.<sup>17</sup> Research on veterinarians and alcohol use is scarce.<sup>8,46</sup> In a study examining drug-caused  
6 4 deaths in Australia, veterinarians were the group with the highest prevalence of alcohol detected in  
7 5 post-mortem examinations.<sup>47</sup> Another study found that veterinarians who turned to alcohol to cope  
8 6 with their work-related stress were more likely to have suicidal thoughts.<sup>10</sup> In a recent study  
9 7 examining different occupational groups in the US Army, there was no significant difference in  
10 8 problem drinking in veterinarians, physicians and dentists.<sup>48</sup> The impact of alcohol regarding to  
11 9 mental health among veterinarians warrants further research.

12  
13  
14  
15  
16  
17  
18  
19 10 There was no significant effect on serious suicidal thoughts regarding the main field of work, neither  
20 11 in the bivariate nor in the adjusted model. Subsequently, all job stress factors were significantly  
21 12 associated with serious suicidal thoughts bivariately, but not in the adjusted model. However, in the  
22 13 additional analyses, the use of alcohol to cope with tension and all three job stress factors remained  
23 14 significant without reality weakness and mental distress included in the model. The findings of  
24 15 *emotional demands*, *work/life balance*, and *fear of complaints/criticism* as important job stress  
25 16 factors concur with previous research.<sup>10,8,49</sup> Although previous studies have suggested that work-  
26 17 related stress influences suicide risk in veterinarians,<sup>50</sup> longitudinal research design may further  
27 18 elaborate on the role of mediating and confounding effects.

28  
29  
30  
31  
32  
33  
34  
35 19 Contrary to previous research,<sup>18,26,27</sup> the personality trait reality weakness, was not significant in the  
36 20 adjusted model. This may be explained by the high correlation between mental distress and reality  
37 21 weakness. The impact of mental distress on suicidal thoughts was high, with a nearly three times  
38 22 increase in odds for each step on the 1-5 scale. The direction of causality obtaining between job  
39 23 stress and mental health in this study cannot be unequivocally assessed. On the assumption that job  
40 24 stress actually is an effect of mental distress and reality weakness, our results would indicate that the  
41 25 effect of job stress factors probably was confounded by mental distress and reality weakness.  
42 26 However, if job stress is defined as the underlying causal factor, as posited above, our results would  
43 27 indicate that mental distress and reality weakness mediate the effect of job stress. Previous studies  
44 28 have found that psychosocial factors in the workplace may play a role for mental health,<sup>51</sup> and that  
45 29 individual factors such as stress are related to the way people perceive their jobs.<sup>52</sup> The importance  
46 30 of mental distress with respect to suicidal ideation is consistent with other research, both among  
47 31 medical doctors and others.<sup>15,17</sup> A previous study among junior physicians during internship found  
48 32 that the effect of work stress on suicidal thoughts and behavior was absorbed by mental distress, in  
49 33 keeping with our finding.<sup>15</sup> First, our study emphasizes the importance of using multivariable models  
50 34 when studying single factors and self-report measures, in order to identify independent and more

1  
2  
3 1 objective effects. Second, it is in keeping with previous research, that emphasizes the complexity in  
4 2 predicting suicidal thoughts and behaviour, there may be both direct and indirect effects of several  
5 3 individual and contextual predictors.<sup>53 54</sup> Third, there may be specific work-related factors of  
6 4 importance for veterinarians with serious suicidal thoughts that we have not captured by our  
7 5 variables in the regression model. Altogether, this explains the apparent discrepancy in our study  
8 6 with regard to the role of work-related factors in serious suicidal thoughts.

9  
10 7 To our knowledge, this is the only nationwide study of suicidal behavior in veterinarians,  
11 8 incorporating all authorized veterinarians, in all main fields of work. A major strength was the high  
12 9 response rate (75 %), making multivariable analyses feasible, and reducing the effect of selection and  
13 10 response biases. Additionally, the questionnaire was quite extensive, allowing the use of a  
14 11 comprehensive predictor model and controlling for several variables. An important limitation is the  
15 12 cross-sectional design, which restricts conclusions about causality. Another limitation is the disparity  
16 13 in referred time span measured by serious suicidal ideation (last 12 months) and mental distress  
17 14 (past 2 weeks), this can lead to more recall bias with respect to suicidal ideation, and a relative  
18 15 overestimation of mental distress. The generalizability of the results may also be limited due to  
19 16 differences in the organization of work life, including workload, in other countries. Nevertheless, we  
20 17 believe the findings are representative of veterinarians in Northern Europe. The study was conducted  
21 18 during the coronavirus-pandemic of 2019 (Covid-19), which may have affected the results. The  
22 19 survey was planned before the pandemic, and any potential effects of Covid-19 (e.g., redundancy,  
23 20 and economic effects in the practices) were not accounted for.

24  
25  
26  
27  
28  
29  
30  
31  
32  
33  
34  
35  
36  
37  
38  
39  
40  
41  
42

## 43 **CONCLUSION**

44 23 In summary, the level of suicidal behavior among veterinarians in Norway is relatively high, and both  
45 24 individual and work-related factors contribute to serious suicidal thoughts. In the multivariable  
46 25 analyses, the individual factors, and particularly mental distress, played a more important role than  
47 26 the work-related factors, while veterinarians themselves regarded work problems as the most  
48 27 contributing factor to their suicidal thoughts. The roles of gender and specific work-related factors  
49 28 should be further investigated to better understand the complexity of suicidal behavior among  
50 29 veterinarians.

51  
52  
53  
54  
55  
56  
57

## 58 **ACKNOWLEDGMENTS**

59  
60

1  
2  
3 1 We would like to express our gratitude to the Norwegian Veterinary Association, including The Small  
4 2 Animal Veterinary Association, The Aquaculture Veterinary Association, and Oslo & Akershus  
5 3 Veterinary Association, as well as MSD Animal Health, for their financial support, making it possible  
6 4 to collect data for this study. Professors Magne Thoresen and Torbjørn Moum have made substantial  
7 5 input to the statistical analyses.  
8  
9  
10  
11  
12  
13  
14  
15  
16  
17  
18  
19

## 20 9 **AUTHOR'S CONTRIBUTION TO THE MANUSCRIPT**

21  
22  
23 10 HSD, RT, and EH designed the study and analyzed the data. HSD wrote the first draft of the  
24 11 manuscript. All authors revised the manuscript and approved the final version of the manuscript. The  
25 12 corresponding author attests that all listed authors meet authorship criteria and that no others  
26 13 meeting the criteria have been omitted. HSD and EH acts as a guarantor.  
27  
28  
29  
30  
31  
32

## 33 15 **DATA AVAILABILITY STATEMENT**

34  
35  
36 16 Data is available upon reasonable request.  
37  
38  
39  
40

## 41 18 **COMPETING INTERESTS STATEMENT**

42  
43  
44 19 None declared.  
45  
46  
47  
48

## 49 21 **FIGURE LEGENDS**

50  
51 22 Supplementary File 4-1 (Interaction between life events and gender): Illustration of the two-way  
52 23 interaction between gender and life events (weighted). The life events scale has been divided into  
53 24 four categories to improve readability of the graph. The gradient is significantly steeper for females  
54 25 than males.  
55  
56  
57  
58  
59  
60

1  
2  
3 1 Supplementary File 4-2 (Interactions between work/life balance and gender): Illustration of the two-  
4 2 way interaction between gender and work/life-balance. The increase in suicidal thoughts with higher  
5 3 work/life imbalance was significantly stronger among males than among females.  
6  
7  
8  
9 4  
10

## 11 5 **FUNDING STATEMENT**

12  
13  
14 6 This work was funded by the Institute of Basic Medical Sciences, Faculty of Medicine at the University  
15 7 of Oslo as an internal Ph.D. fellowship and financially supported by the Norwegian Veterinary  
16 8 Association, including the Small Animal Veterinary Association, the Aquaculture Veterinary  
17 9 Association and Oslo & Akershus Veterinary Association, as well as MSD Animal Health. The sponsors  
18 10 had no role in the collection, analysis, and interpretation of data, in the writing of the report, and in  
19 11 the decision to submit the paper for publication. The authors had full access to all the data in this  
20 12 study and take complete responsibility for the integrity of the data and the accuracy of the data  
21 13 analyses.  
22  
23  
24  
25  
26  
27  
28  
29  
30 14  
31 15  
32  
33  
34  
35  
36  
37  
38  
39  
40  
41  
42  
43  
44  
45  
46  
47  
48  
49  
50  
51  
52  
53  
54  
55  
56  
57  
58  
59  
60

1  
2  
3 1 REFERENCES  
4  
5

- 6 2 1. Platt B, Hawton K, Simkin S, et al. Systematic review of the prevalence of suicide in veterinary  
7 3 surgeons. *Occup Med (Lond)* 2010;60:436-46. doi: 10.1093/occmed/kqq044
- 8 4 2. Milner AJ, Niven H, Page K, et al. Suicide in veterinarians and veterinary nurses in Australia: 2001-  
9 5 2012. *Aust Vet J* 2015;93:308-10. doi: 10.1111/avj.12358
- 10 6 3. Tomasi SE, Fechter-Leggett ED, Edwards NT, et al. Suicide among veterinarians in the United States  
11 7 from 1979 through 2015. *J Am Vet Med Assoc* 2019;254:104-12. doi:  
12 8 10.2460/javma.254.1.104
- 13 9 4. Witte TK, Spitzer EG, Edwards N, et al. Suicides and deaths of undetermined intent among  
14 10 veterinary professionals from 2003 through 2014. *J Am Vet Med Assoc* 2019;255:595-608.  
15 11 doi: 10.2460/javma.255.5.595
- 16 12 5. Perret JL, Best CO, Coe JB, et al. Prevalence of mental health outcomes among Canadian  
17 13 veterinarians. *J Am Vet Med Assoc* 2020;256:365-75. doi: 10.2460/javma.256.3.365
- 18 14 6. Schwerdtfeger KA, Bahramsoltani M, Spangenberg L, et al. Depression, suicidal ideation and  
19 15 suicide risk in German veterinarians compared with the general German population. *Vet Rec*  
20 16 2020;186:e2. doi: 10.1136/vr.105430
- 21 17 7. Nett RJ, Witte TK, Holzbauer SM, et al. Risk factors for suicide, attitudes toward mental illness, and  
22 18 practice-related stressors among US veterinarians. *J Am Vet Med Assoc* 2015;247:945-55.  
23 19 doi: 10.2460/javma.247.8.945
- 24 20 8. Platt B, Hawton K, Simkin S, et al. Suicidal behaviour and psychosocial problems in veterinary  
25 21 surgeons: a systematic review. *Soc Psychiatry Psychiatr Epidemiol* 2012;47:223-40. doi:  
26 22 10.1007/s00127-010-0328-6
- 27 23 9. Platt B, Hawton K, Simkin S, et al. Suicidality in the veterinary profession: interview study of  
28 24 veterinarians with a history of suicidal ideation or behavior. *Crisis* 2012;33:280-9. doi:  
29 25 10.1027/0227-5910/a000143
- 30 26 10. Wallace JE. Burnout, coping and suicidal ideation: an application and extension of the job  
31 27 demand-control-support model. *J Workplace Behav Health* 2017;32:99-118. doi:  
32 28 10.1080/15555240.2017.1329628
- 33 29 11. Dow MQ, Chur-Hansen A, Hamood W, et al. Impact of dealing with bereaved clients on the  
34 30 psychological wellbeing of veterinarians. *Aust Vet J* 2019;97:382-9. doi: 10.1111/avj.12842
- 35 31 12. Waters D, Barnhart G, Cowan J, et al. Attachment loss and trauma: A descriptive  
36 32 phenomenological analysis of suicidality and depression in veterinarians. *Psychol Trauma*  
37 33 2019. doi: 10.1037/tra0000544
- 38 34 13. Whitnall VM, Simmonds JG. Occupational stress and coping strategies in experienced Australian  
39 35 veterinarians. *Vet Rec* 2021;189:e202. doi: 10.1002/vetr.202
- 40 36 14. Hem E, Grønvold NT, Aasland OG, et al. The prevalence of suicidal ideation and suicidal attempts  
41 37 among Norwegian physicians. Results from a cross-sectional survey of a nationwide sample.  
42 38 *Eur Psychiatry* 2000;15:183-9. doi: 10.1016/s0924-9338(00)00227-3
- 43 39 15. Tyssen R, Vaglum P, Grønvold NT, et al. Suicidal ideation among medical students and young  
44 40 physicians: a nationwide and prospective study of prevalence and predictors. *J Affect Disord*  
45 41 2001;64:69-79. doi: 10.1016/s0165-0327(00)00205-6
- 46 42 16. Howarth EJ, O'Connor DB, Panagioti M, et al. Are stressful life events prospectively associated  
47 43 with increased suicidal ideation and behaviour? A systematic review and meta-analysis. *J*  
48 44 *Affect Disord* 2020;266:731-42. doi: 10.1016/j.jad.2020.01.171
- 49 45 17. Turecki G, Brent DA. Suicide and suicidal behaviour. *Lancet* 2016;387:1227-39. doi:  
50 46 10.1016/s0140-6736(15)00234-2
- 51 47 18. Tyssen R, Hem E, Vaglum P, et al. The process of suicidal planning among medical doctors:  
52 48 predictors in a longitudinal Norwegian sample. *J Affect Disord* 2004;80:191-8. doi:  
53 49 10.1016/s0165-0327(03)00091-0
- 54  
55  
56  
57  
58  
59  
60

1  
2  
3  
4  
5  
6  
7  
8  
9  
10  
11  
12  
13  
14  
15  
16  
17  
18  
19  
20  
21  
22  
23  
24  
25  
26  
27  
28  
29  
30  
31  
32  
33  
34  
35  
36  
37  
38  
39  
40  
41  
42  
43  
44  
45  
46  
47  
48  
49  
50  
51  
52

19. O'Connor RC, Nock MK. The psychology of suicidal behaviour. *Lancet Psychiatry* 2014;1:73-85. doi: 10.1016/s2215-0366(14)70222-6
20. Reijula K, Räsänen K, Hämäläinen M, et al. Work environment and occupational health of Finnish veterinarians. *Am J Ind Med* 2003;44:46-57. doi: 10.1002/ajim.10228
21. Kersebohm JC, Lorenz T, Becher A, et al. Factors related to work and life satisfaction of veterinary practitioners in Germany. *Vet Rec Open* 2017;4:e000229. doi: 10.1136/vetreco-2017-000229
22. Allen LC. Feminisation: threat or opportunity? *Vet Rec* 2016;178:391-3. doi: 10.1136/vr.i2140
23. Hatch PH, Winefield HR, Christie BA, et al. Workplace stress, mental health, and burnout of veterinarians in Australia. *Aust Vet J* 2011;89:460-8. doi: 10.1111/j.1751-0813.2011.00833.x
24. Brezo J, Paris J, Turecki G. Personality traits as correlates of suicidal ideation, suicide attempts, and suicide completions: a systematic review. *Acta Psychiatr Scand* 2006;113:180-206. doi: 10.1111/j.1600-0447.2005.00702.x
25. Torgersen S, Alnæs R. Localizing DSM-III personality disorders in a three-dimensional structural space. *J Pers Disord* 1989;3:274-81. doi: 10.1521/pedi.1989.3.4.274
26. Berg AM, Hem E, Lau B, et al. Suicidal ideation and attempts in Norwegian police. *Suicide Life Threat Behav* 2003;33:302-12. doi: 10.1521/suli.33.3.302.23215
27. Sterud T, Hem E, Lau B, et al. Suicidal ideation and suicide attempts in a nationwide sample of operational Norwegian ambulance personnel. *J Occup Health* 2008;50:406-14. doi: 10.1539/joh.l8025
28. Blair A, Hayes HM, Jr. Cancer and other causes of death among U.S. veterinarians, 1966-1977. *Int J Cancer* 1980;25:181-5. doi: 10.1002/ijc.2910250203
29. Gardner DH, Hini D. Work-related stress in the veterinary profession in New Zealand. *N Z Vet J* 2006;54:119-24. doi: 10.1080/00480169.2006.36623
30. Paykel ES, Myers JK, Lindenthal JJ, et al. Suicidal feelings in the general population: a prevalence study. *Br J Psychiatry* 1974;124:460-9. doi: 10.1192/bjp.124.5.460
31. Rosta J, Aasland OG. Changes in the lifetime prevalence of suicidal feelings and thoughts among Norwegian doctors from 2000 to 2010: a longitudinal study based on national samples. *BMC Psychiatry* 2013;13:322. doi: 10.1186/1471-244x-13-322
32. Torgersen S. Hereditary-environmental differentiation of general neurotic, obsessive, and impulsive hysterical personality traits. *Acta Genet Med Gemellol (Roma)* 1980;29:193-207. doi: 10.1017/s0001566000007935
33. Tyssen R. Personality traits. In: Brower K, Riba M, eds. *Physician Mental Health and Well-Being: Research and Practice*. USA: Springer, 2017:211-36. doi: 10.1007/978-3-319-55583-6\_10
34. Mahmood JI, Grotmol KS, Tesli M, et al. Life satisfaction in Norwegian medical doctors: a 15-year longitudinal study of work-related predictors. *BMC Health Serv Res* 2019;19:729. doi: 10.1186/s12913-019-4599-7
35. Derogatis L. *Administration, scoring and procedures manual*. 2nd ed. Baltimore, MD.: Procedures Psychometric Research, SCL-90-R 1983.
36. Tambs K, Moum T. How well can a few questionnaire items indicate anxiety and depression? *Acta Psychiatr Scand* 1993;87:364-7. doi: 10.1111/j.1600-0447.1993.tb03388.x
37. Ruud N, Løvseth LT, Rø KE, et al. Comparing mental distress and help-seeking among first-year medical students in Norway: results of two cross-sectional surveys 20 years apart. *BMJ Open* 2020;10:e036968. doi:10.1136/bmjopen-2020-036968
38. Rø KE, Gude T, Tyssen R., et al. Counselling for burnout in Norwegian doctors: one year cohort study. *BMJ* 2008;337:a2004. doi:10.1136/bmj.a2004
39. Timmer SG, Verhoff J, Colten ME. Life stress, helplessness, and the use of alcohol and drugs to cope: an analysis of national survey data. In: Shiffman S, Wills TA, eds. *Coping and Substance Use*. Orlando, FL: Academic Press, 1985, 171-98.
40. Tyssen R, Vaglum P, Aasland OG, et al. Use of alcohol to cope with tension, and its relation to gender, years in medical school and hazardous drinking: a study of two nation-wide Norwegian samples of medical students. *Addiction* 1998;93:1341-9. doi: 10.1046/j.1360-0443.1998.93913415.x



- 1  
2  
3 1 41. Sterud T, Hem E, Ekeberg O, et al. Occupational stress and alcohol use: a study of two nationwide  
4 2 samples of operational police and ambulance, personnel in Norway. *J Stud Alcohol Drugs*  
5 3 2007;68:896-904. doi: 10.15288/jsad.2007.68.896  
6 4  
7 42. Mahmood JI, Støen Grotmol K, Tesli M, et al. Contextual Factors and Mental Distress as Possible  
8 5 Predictors of Hazardous Drinking in Norwegian Medical Doctors: A 15-Year Longitudinal,  
9 6 Nationwide Study. *Eur Addict Res* 2017;23:19-27. doi: 10.1159/000452442  
10 7  
11 7 43. Cooper CL, Rout U, Faragher B. Mental health, job satisfaction, and job stress among general  
12 8 practitioners. *BMJ* 1989;298:366-70. doi: 10.1136/bmj.298.6670.366  
13 9  
14 9 44. Tyssen R, Vaglum P, Grønvold NT et al. The impact of job stress and working conditions on mental  
15 10 health problems among junior house officers. A nationwide Norwegian prospective cohort  
16 11 study. *Med Educ* 2000;34:374-84. doi: 10.1046/j.1365-2923.2000.00540.x  
17 12  
18 12 45. Bartram DJ, Yadegarfar G, Baldwin DS. A cross-sectional study of mental health and well-being  
19 13 and their associations in the UK veterinary profession. *Soc Psychiatry Psychiatr Epidemiol*  
20 14 2009;44:1075-85. doi: 10.1007/s00127-009-0030-8  
21 15  
22 15 46. Harling M, Strehmel P, Schablon A, et al. Psychosocial stress, demoralization and the  
23 16 consumption of tobacco, alcohol and medical drugs by veterinarians. *J Occup Med Toxicol*  
24 17 2009;4:4. doi: 10.1186/1745-6673-4-4  
25 18  
26 18 47. Pilgrim JL, Dorward R, Drummer OH. Drug-caused deaths in Australian medical practitioners and  
27 19 health-care professionals. *Addiction* 2017;112:486-93. doi: 10.1111/add.13619  
28 20  
29 20 48. Rivera AC, Geronimo-Hara TR, LeardMann CA. Behavioural health and sleep problems among US  
30 21 Army veterinarians and veterinary technicians participating in the Millenium Cohort Study. *J*  
31 22 *Am Vet Med Assoc* 2021;258:767-75. doi:10.2460/javma.258.7.767  
32 23  
33 23 49. Bartram DJ, Yadegarfar G, Baldwin DS. Psychosocial working conditions and work-related  
34 24 stressors among UK veterinary surgeons. *Occup Med (Lond)* 2009;59:334-41. doi:  
35 25 10.1093/ocmed/kqp072  
36 26  
37 26 50. Bartram DJ, Baldwin DS. Veterinary surgeons and suicide: a structured review of possible  
38 27 influences on increased risk. *Vet Rec* 2010;166:388-97. doi: 10.1136/vr.b4794  
39 28  
40 28 51. Stansfeld S, Candy B. Psychosocial work environment and mental health – a meta-analytic review.  
41 29 *Scand J Work Environ Health* 2006;32:443-62. doi: 10.5271/sjweh.1050  
42 30  
43 30 52. Firth-Cozens J, Hardy GE. Occupational stress, clinical treatment and changes in job perceptions. *J*  
44 31 *Occup Organ Psychol* 1992;65:81-8. doi: [https://doi.org/10.1111/j.2044-](https://doi.org/10.1111/j.2044-8325.1992.tb00486.x)  
45 32 [8325.1992.tb00486.x](https://doi.org/10.1111/j.2044-8325.1992.tb00486.x)  
46 33  
47 33 53. Rich AR, Bonner RL. Concurrent validity of a stress-vulnerability model of suicidal ideation and  
48 34 behavior: a follow-up study. *Suicide Life Threat Behav* 1987;17:265–70. doi: 10.1111/j.1943-  
49 35 [278x.1987.tb00067.x](https://doi.org/10.1111/j.1943-278x.1987.tb00067.x).  
50 36  
51 36 54. Rudd MD. An integrative model of suicidal ideation. *Suicide Life Threat Behav* 1990;20:16-30.  
52 37  
53  
54  
55  
56  
57  
58  
59  
60

# NORVET-undersøkelsen

## Arbeid, trivsel og mental helse hos veterinærer i Norge

På de fleste spørsmålene skal du angi svar ved å sette et kryss i en rute slik .  
Vennligst benytt en penn og sett krysset tydelig i ruten.

Noen steder skal du sette tall eller bokstaver i en eller flere ruter, slik  eller slik .

Skjemaene vil bli lest maskinelt, derfor er det viktig at du skriver tydelig i rutene.

Det er svært viktig at du velger å merke av bare ett svaralternativ, der ikke annet fremgår av teksten.  
Hvis to alternativer synes like dekkende, bes du velge det ene. Dette vil jevne seg ut på gruppenivå.

Selv om det kanskje er noen spørsmål du synes er mindre viktige, ber vi deg svare likevel.  
Det vil bidra til å styrke undersøkelsen.

Det vil være en del spørsmål som blir gjentatt flere ganger i skjemaet. Dette skyldes at de utgjør en integrert del av standardiserte måleinstrumenter. Noen ganger spørres det også om opplysninger for ulike tidsperioder. Dette gjøres for å kunne foreta pålitelige sammenligninger med flere andre grupper, nasjonalt og internasjonalt.

***LYKKE TIL, OG PÅ FORHÅND TUSEN TAKK FOR INNSATSEN!***

## A. BAKGRUNNSOPPLYSNINGER

### A1 Kjønn:

- Kvinne  
 Mann  
 Annen kjønnsidentitet

### A3 Nåværende sivilstatus

- Ugift       Separert  
 Samboende     Skilt  
 Gift             Enke/enkemann

### A2 Alder:

- 20-25    26-30    31-35    36-40    41-45    46-50    51-55    56-60    61-65    66-70    >70

### Partner

#### A4 Har du fast partner (kjæreste/samboer/ektefelle)?

- Nei  
 Ja

#### A5 Hvis JA, er din partner i arbeid?

- Nei  
 Ja

#### A6 Hvis JA, er din partner veterinær?

- Nei  
 Ja

### Barn og familie

#### A7 Hvor mange barn har du?

- Ingen    1 barn    2 barn    3 eller flere barn

### HAR DU I LØPET AV DE SISTE 12 MND. OPPLEVD NOE AV DET FØLGENDE?

- |                                                                                                   |                          |                                                                              |                          |
|---------------------------------------------------------------------------------------------------|--------------------------|------------------------------------------------------------------------------|--------------------------|
| A8 En alvorlig sykdom eller ulykke                                                                | <input type="checkbox"/> | A18 Samlivsproblemer                                                         | <input type="checkbox"/> |
| A9 Skilsmisse/separasjon med samboer eller kjæreste                                               | <input type="checkbox"/> | A19 Flyttet fra foreldre                                                     | <input type="checkbox"/> |
| A10 Giftet deg/flyttet sammen med samboer                                                         | <input type="checkbox"/> | A20 Permisjon                                                                | <input type="checkbox"/> |
| A11 Fått barn                                                                                     | <input type="checkbox"/> | A21 Sykefravær 21 dager eller mer                                            | <input type="checkbox"/> |
| A12 Dødsfall familie/nære venner                                                                  | <input type="checkbox"/> | A22 Du selv har vært involvert i tilsynssak fra tilsynsmyndigheter           | <input type="checkbox"/> |
| A13 Andre vansker hos nær familie                                                                 | <input type="checkbox"/> | A23 Alvorlig sykdom hos et nærtstående familiemedlem (partner/barn/foreldre) | <input type="checkbox"/> |
| A14 Alvorlige økonomiske problemer                                                                | <input type="checkbox"/> | A24 Andre alvorlige hendelser Spesifiser:                                    | <input type="checkbox"/> |
| A15 Ektefelle har vært arbeidsløs/permittert                                                      | <input type="checkbox"/> |                                                                              |                          |
| A16 Alvorlige bomessige problemer                                                                 | <input type="checkbox"/> |                                                                              |                          |
| A17 Du selv, eller noen i nær familie, har vært utsatt for, eller innblandet i, alvorlig lovbrudd | <input type="checkbox"/> |                                                                              |                          |

## B. ARBEIDSFORHOLD OG ARBEIDSBELASTNING

### Hovedstilling

#### B1 Hvilken tilknytningsform har du til arbeidslivet?

Ansatt  Selvstendig næringsdrivende  Annet, spesifiser: \_\_\_\_\_

#### B2 Har du en lederrolle?

Ja  Nei

#### B3 Hva slags hovedstilling har du nå?

Smådyrpraksis

Produksjonsdyrpraksis

Kombinertpraksis

Hestepraksis

Akvakultur

Offentlig forvaltning

Akademia/forskning

Pensjonist

Annet, eventuelt spesifiser: \_\_\_\_\_

#### B3a Hva slags stilling er dette?

Fast stilling

Tidsbegrenset utdanningsstilling

Vikariat      Hvis vikariat, fyll inn antall mnd

Annet      (samlet lengde)

#### B3b Jobber du i

Bedrift som er del av kjede  Frittstående bedrift

B4 Hvor mange måneder har du vært i din nåværende stilling? I ca.    måneder

### Arbeidstidsforhold

B5 Hvor mange prosent er din hovedstilling?

Angi prosent:

%

B6 Hvor lang er din fastlagte arbeidstid i timer per uke i din hovedstilling?

timer og   minutter pr uke

B7 Hvor mange timer jobber du faktisk i gjennomsnitt pr. uke (inkludert alle stillinger)?

timer

B8 I en gjennomsnittlig arbeidsuke, inkludert ev. bistilling(er), omtrent hvor mange timer pr. uke bruker du på:

|                    |                                                 |                      |                                                 |
|--------------------|-------------------------------------------------|----------------------|-------------------------------------------------|
| 1.1 Klinisk arbeid | <input type="text"/> <input type="text"/> timer | 1.2 Møtevirksomhet   | <input type="text"/> <input type="text"/> timer |
| 1.3 Papirarbeid    | <input type="text"/> <input type="text"/> timer | 1.4 Telefoner/e-post | <input type="text"/> <input type="text"/> timer |
| 1.5 Reisetid       | <input type="text"/> <input type="text"/> timer | 1.6 Totalt           | <input type="text"/> <input type="text"/> timer |

**B9** Hvor mange timer overtid har du i gjennomsnitt i din hovedstilling i en vanlig arbeidsuke? (Ikke forlenget arbeidstid eller utrykning på vakt, kun tilfeldig overtid.)

Betalt:

Ubetalt:

timer pr. uke

timer pr. uke

**B10** Hvor ofte har du overtidsarbeid/forlenget arbeidstid (betalt eller ubetalt)?

- Aldri
- Sjeldnere enn en gang i måneden
- Minst en gang i måneden
- Omtrent annenhver uke
- Hver uke

### Bistilling

**B11** Har du noen fast bistilling eller ekstrajobb i tillegg til din hovedstilling?

- Nei
- Ja

**B12** Hvis du har en bistilling, hvor mange arbeidstimer utgjør denne stillingen gjennomsnittlig pr. uke?

timer pr. uke

### Vakter som veterinær

**B13** Hvis du har faste vakter ut over normal arbeidstid i din hovedstilling, hva slags vaktordning har du nå?

- Tar ikke faste vakter \*     9-delt    *\*Gå til spørsmål B18*
- 2-3-delt     10-delt
- 4-5-delt     11-delt
- 6-7-delt     >12-delt
- 8-delt

**B14** Hvilken type vaktordning deltar du i?

- Offentlig vakt     Privat vakt

**B15** Hvis du tar faste vakter ut over normal arbeidstid i din hovedstilling, hvor lange er vaktene?

- Ca 1/2 døgn
- Ca. 1 døgn
- Mer enn 1 døgn
- Annet; hva \_\_\_\_\_

**B16 Ca. hvor mange timer av dine faste vakter tilbringer du**Aktiv:   timer

Har du

Hvilende:   timer tilstedevakt eller  hjemmevaktSovende:   timer**B17 Hvis du har faste vakter, cirka hvor lenge arbeider du dagen etter vakt?**

- Arbeider ikke rett etter vakt
- 1-3 timer
- 4-6 timer
- 7 timer eller mer

**B18 Hvis du har vakter som en del av en bistilling, cirka hvor mange timer av disse vaktene tilbringer du***Hvis du ikke har vakt som del av bistilling, gå til B19*Aktiv:   timerHvilende:   timer

Har du

Sovende:   timer tilstedevakt eller  hjemmevakt**B19 Cirka hvor mange avspaseringsuker pr. halvår benytter du til ikke-faglig aktivitet?**

- Ingen uke
- 1 uke
- 2 uker
- 3 uker
- 4 uker
- 5 uker
- 6 uker eller flere

**B20 Dersom du jobber i klinisk praksis, hvor mange avlivinger utfører du omtrent på en vanlig uke?**

- 0-4
- 5-9
- 10-14
- 15 eller fler

**Belastningsfaktorer**

**I hvilken grad gjør de følgende situasjoner/faktorer deg belastet (stresset)?**

Sett **ett kryss** i den ruten som passer best for deg.

|                                                                         | Ikke noen belastning     | Litt belastning          | Endel belastning         | Mye belastning           | Svært mye belastning     |
|-------------------------------------------------------------------------|--------------------------|--------------------------|--------------------------|--------------------------|--------------------------|
| <b>B21</b> Kritikk av veterinærer i media                               | <input type="checkbox"/> |
| <b>B22</b> Kundene/dyreeierne setter ikke pris på det du gjør           | <input type="checkbox"/> |
| <b>B23</b> Bekymring over klager fra kunder/dyreeiere                   | <input type="checkbox"/> |
| <b>B24</b> Å ha ansvar for dyrenes liv 24 timer i døgnet                | <input type="checkbox"/> |
| <b>B25</b> Telefoner, sykebesøk og utrykning om natten                  | <input type="checkbox"/> |
| <b>B26</b> Å ta seg av vanskelige veterinærmedisinske problemstillinger | <input type="checkbox"/> |
| <b>B27</b> Å ta seg av vanskelige kunder/dyreeiere                      | <input type="checkbox"/> |
| <b>B28</b> Krysspress mellom økonomi og dyrevelferd/etikk               | <input type="checkbox"/> |
| <b>B29</b> Bekymringer knyttet til egen økonomi                         | <input type="checkbox"/> |
| <b>B30</b> Bekymringer knyttet til bedriftens økonomi                   | <input type="checkbox"/> |
| <b>B31</b> Sykejournaler og annet papirarbeid                           | <input type="checkbox"/> |
| <b>B32</b> Kirurgiske inngrep                                           | <input type="checkbox"/> |
| <b>B33</b> Arbeidsmiljøet                                               | <input type="checkbox"/> |
| <b>B34</b> Tidspress                                                    | <input type="checkbox"/> |
| <b>B35</b> Jobben går ut over familieliv                                | <input type="checkbox"/> |
| <b>B36</b> Jobben går ut over sosialt liv                               | <input type="checkbox"/> |
| <b>B37</b> Daglig kontakt med døende og kritisk syke dyr                | <input type="checkbox"/> |
| <b>B38</b> Å ta seg av dødssyke dyr og deres eiere                      | <input type="checkbox"/> |
| <b>B39</b> Forespørsler om dyr fra venner og bekjente                   | <input type="checkbox"/> |
| <b>B40</b> Forespørsler om dyr fra slektninger                          | <input type="checkbox"/> |
| <b>B41</b> Være i generell beredskap                                    | <input type="checkbox"/> |

|                                                                                           | Ikke noen belastning     | Litt belastning          | Endel belastning         | Mye belastning           | Svært mye belastning     |
|-------------------------------------------------------------------------------------------|--------------------------|--------------------------|--------------------------|--------------------------|--------------------------|
| <b>B42</b> Følelsesmessig engasjement i dyrene                                            | <input type="checkbox"/> |
| <b>B43</b> Forventninger om at veterinæren også skal hjelpe med ikke-medisinske problemer | <input type="checkbox"/> |
| <b>B44</b> Avbrytelser og mas i arbeidssituasjonen                                        | <input type="checkbox"/> |
| <b>B45</b> Å ta seg av lidende dyr                                                        | <input type="checkbox"/> |
| <b>B46</b> Konflikt med kolleger/medarbeidere                                             | <input type="checkbox"/> |
| <b>B47</b> Å få til en balanse mellom arbeid og privatliv                                 | <input type="checkbox"/> |

**Forhold til kolleger**

|                                                                                  | Ingen grad               |                          |                          | I svært høy grad         |                          |                          |                          |
|----------------------------------------------------------------------------------|--------------------------|--------------------------|--------------------------|--------------------------|--------------------------|--------------------------|--------------------------|
| <b>B48</b> I hvilken grad trives du i det store og det hele blant dine kolleger? | <input type="checkbox"/> |
| <b>B49</b> I hvor stor grad har du følt deg ivaretatt av dine veterinærkolleger? | <input type="checkbox"/> |
|                                                                                  | Stemmer helt             |                          | Stemmer ganske bra       | Stemmer ikke særlig bra  | Stemmer ikke             |                          |                          |
| <b>B50</b> Det er rolig og behagelig stemning på min arbeidsplass                | <input type="checkbox"/> |                          |
| <b>B51</b> Det er godt samhold                                                   | <input type="checkbox"/> |                          |
| <b>B52</b> Mine arbeidskolleger stiller opp for meg                              | <input type="checkbox"/> |                          |
| <b>B53</b> Det er forståelse for at jeg kan ha en dårlig dag                     | <input type="checkbox"/> |                          |
| <b>B54</b> Jeg kommer godt overens med mine overordnede*                         | <input type="checkbox"/> |                          |
| <b>B55</b> Jeg trives bra med mine arbeidskolleger                               | <input type="checkbox"/> |                          |

\*Besvares bare dersom du har en overordnet.

**B56** Når du føler deg bekymret, engstelig eller nervøs - drikker du noen gang alkohol for å klare situasjonen bedre?

Aldri    Sjelden    Av og til    Ofte



**Vedrørende ditt arbeid**

|            |                                                                                  | Meget sjelden eller aldri | Nokså sjelden            | Av og til                | Nokså ofte               | Meget ofte eller alltid  |
|------------|----------------------------------------------------------------------------------|---------------------------|--------------------------|--------------------------|--------------------------|--------------------------|
| <b>B57</b> | Er det fastsatt klare mål for din jobb?                                          | <input type="checkbox"/>  | <input type="checkbox"/> | <input type="checkbox"/> | <input type="checkbox"/> | <input type="checkbox"/> |
| <b>B58</b> | Vet du hva som er ditt ansvarsområde?                                            | <input type="checkbox"/>  | <input type="checkbox"/> | <input type="checkbox"/> | <input type="checkbox"/> | <input type="checkbox"/> |
| <b>B59</b> | Vet du nøyaktig hva som forventes av deg i jobben?                               | <input type="checkbox"/>  | <input type="checkbox"/> | <input type="checkbox"/> | <input type="checkbox"/> | <input type="checkbox"/> |
| <b>B60</b> | Må du gjøre ting du mener burde vært gjort annerledes?                           | <input type="checkbox"/>  | <input type="checkbox"/> | <input type="checkbox"/> | <input type="checkbox"/> | <input type="checkbox"/> |
| <b>B61</b> | Får du oppgaver uten tilstrekkelig hjelpemidler og ressurser til å fullføre dem? | <input type="checkbox"/>  | <input type="checkbox"/> | <input type="checkbox"/> | <input type="checkbox"/> | <input type="checkbox"/> |
| <b>B62</b> | Mottar du motstridende forespørsler fra to eller flere personer?                 | <input type="checkbox"/>  | <input type="checkbox"/> | <input type="checkbox"/> | <input type="checkbox"/> | <input type="checkbox"/> |
| <b>B63</b> | Fordeler din nærmeste sjef arbeidsoppgaver rettferdig og upartisk?*              | <input type="checkbox"/>  | <input type="checkbox"/> | <input type="checkbox"/> | <input type="checkbox"/> | <input type="checkbox"/> |
| <b>B64</b> | Behandler din nærmeste sjef de ansatte rettferdig og upartisk?*                  | <input type="checkbox"/>  | <input type="checkbox"/> | <input type="checkbox"/> | <input type="checkbox"/> | <input type="checkbox"/> |
| <b>B65</b> | Er forholdet mellom deg og din nærmeste sjef en kilde til stress for deg?*       | <input type="checkbox"/>  | <input type="checkbox"/> | <input type="checkbox"/> | <input type="checkbox"/> | <input type="checkbox"/> |

\*Besvares bare dersom du har en overordnet.

|            |                                                                  | Ja, ofte                 | Ja, noen ganger          | Nei, sjelden             | Nei, så godt som aldri   |
|------------|------------------------------------------------------------------|--------------------------|--------------------------|--------------------------|--------------------------|
| <b>B66</b> | Krever arbeidet ditt at du arbeider meget raskt?                 | <input type="checkbox"/> | <input type="checkbox"/> | <input type="checkbox"/> | <input type="checkbox"/> |
| <b>B67</b> | Krever arbeidet ditt at du arbeider meget hardt?                 | <input type="checkbox"/> | <input type="checkbox"/> | <input type="checkbox"/> | <input type="checkbox"/> |
| <b>B68</b> | Krever arbeidet ditt for stor arbeidsinnsats?                    | <input type="checkbox"/> | <input type="checkbox"/> | <input type="checkbox"/> | <input type="checkbox"/> |
| <b>B69</b> | Har du tilstrekkelig tid til å utføre arbeidsoppgavene dine?     | <input type="checkbox"/> | <input type="checkbox"/> | <input type="checkbox"/> | <input type="checkbox"/> |
| <b>B70</b> | Forekommer det ofte motstridende krav i arbeidet ditt?           | <input type="checkbox"/> | <input type="checkbox"/> | <input type="checkbox"/> | <input type="checkbox"/> |
| <b>B71</b> | Får du lære nye ting i ditt arbeid?                              | <input type="checkbox"/> | <input type="checkbox"/> | <input type="checkbox"/> | <input type="checkbox"/> |
| <b>B72</b> | Krever ditt arbeid dyktighet?                                    | <input type="checkbox"/> | <input type="checkbox"/> | <input type="checkbox"/> | <input type="checkbox"/> |
| <b>B73</b> | Krever ditt arbeid oppfinnsomhet/kreativitet?                    | <input type="checkbox"/> | <input type="checkbox"/> | <input type="checkbox"/> | <input type="checkbox"/> |
| <b>B74</b> | Innebærer ditt arbeid at du gjør samme ting om og om igjen?      | <input type="checkbox"/> | <input type="checkbox"/> | <input type="checkbox"/> | <input type="checkbox"/> |
| <b>B75</b> | Har du frihet til å bestemme hvordan ditt arbeid skal utføres?   | <input type="checkbox"/> | <input type="checkbox"/> | <input type="checkbox"/> | <input type="checkbox"/> |
| <b>B76</b> | Har du frihet til å bestemme hva som skal utføres i ditt arbeid? | <input type="checkbox"/> | <input type="checkbox"/> | <input type="checkbox"/> | <input type="checkbox"/> |

## C HELSE

Nedenfor finner du en oppstilling av plager som man av og til har.

Les nøye gjennom dem, en for en, og angi deretter hvor mye hvert enkelt problem har plaget deg eller vært til besvær i løpet av de siste 14 dagene

|    |                                             | Ikke i det hele tatt     | Litt                     | Måtelig                  | Ganske mye               | Veldig mye               |
|----|---------------------------------------------|--------------------------|--------------------------|--------------------------|--------------------------|--------------------------|
| C1 | Nervøsitet, indre uro                       | <input type="checkbox"/> |
| C2 | Stadig redd eller engstelig                 | <input type="checkbox"/> |
| C3 | Følelse av håpløshet med tanke på fremtiden | <input type="checkbox"/> |
| C4 | Mye bekymret eller urolig                   | <input type="checkbox"/> |
| C5 | Nedtrykt, tungsindig                        | <input type="checkbox"/> |

**C6 Hvis du har hatt psykiske problemer i løpet av det siste året, har du da søkt/fått hjelp for dette?**

Ikke hatt psykiske problemer av betydning\*

\*Gå til spørsmål C13

Har ikke søkt hjelp selv om jeg nok kunne ha hatt behov for det

Ja, har konsultert allmennlege eller fastlege

Ja, har konsultert psykolog/psykiater

Ja, har vært innlagt i psykiatrisk avdeling

**C7 Hvis du har vært i kontakt med psykolog/psykiater, hva slags behandling har du fått?**

*Det er mulig å sette flere klyss*

1-5 samtaler

Flere enn 5 samtaler

Psykoterapi/psykoanalyse

Gruppeterapi

Medikamentell behandling

**Hvis du har hatt psykiske problemer i løpet av det siste året, i hvilken grad mener du at følgende forhold var medvirkende til at det ble vanskelig for deg?**

|     |                                            | Betydde ingenting        | Betydde litt             | Betydde endel            | Betydde ganske mye       | Betydde svært mye        |
|-----|--------------------------------------------|--------------------------|--------------------------|--------------------------|--------------------------|--------------------------|
| C8  | Personlige forhold                         | <input type="checkbox"/> |
| C9  | Forhold til familie/ektefelle/partner      | <input type="checkbox"/> |
| C10 | Sosiale forhold                            | <input type="checkbox"/> |
| C11 | Problemer i forbindelse med veterinæryrket | <input type="checkbox"/> |
| C12 | Andre forhold                              | <input type="checkbox"/> |

**Livsløst**

De følgende spørsmål dreier seg om du i løpet av det siste året har mistet livsløsten, og i så fall i hvilken grad?

**C13** Har du noen gang i løpet av det siste året følt at livet ikke er verdt å leve?

Aldri  Nesten aldri  Noen ganger  Mange ganger

**C14** Har du i løpet av det siste året ønsket at du var død - f.eks. at du skulle sovne inn og aldri våkne igjen?

Aldri  Nesten aldri  Noen ganger  Mange ganger

**C15** Har du noen gang i løpet av det siste året tenkt på å ta livet ditt, selv om du vet at du ikke vil gjøre det?

Aldri  Nesten aldri  Noen ganger  Mange ganger

**C16** Har du noen gang i løpet av det siste året vært i den situasjonen at du alvorlig har overveiet å ta livet ditt og til og med planlagt hvordan du i såfall skulle gjøre det?

Aldri  Nesten aldri  Noen ganger  Mange ganger

Hvis det har hendt, i hvilken grad mener du de følgende forhold var medvirkende til at det ble så vanskelig for deg?

|                                                       | Betydde ingenting        | Betydde litt             | Betydde endel            | Betydde ganske mye       | Betydde svært mye        |
|-------------------------------------------------------|--------------------------|--------------------------|--------------------------|--------------------------|--------------------------|
| <b>C17</b> Personlige forhold                         | <input type="checkbox"/> |
| <b>C18</b> Forhold til familie/ektefelle/partner      | <input type="checkbox"/> |
| <b>C19</b> Sosiale forhold                            | <input type="checkbox"/> |
| <b>C20</b> Problemer i forbindelse med veterinæryrket | <input type="checkbox"/> |
| <b>C21</b> Andre forhold                              | <input type="checkbox"/> |

**C22** Har du i løpet av det siste året forsøkt å ta ditt eget liv?

Aldri  Nesten aldri  Noen ganger  Mange ganger

Hvis det har hendt, i hvilken grad mener du de følgende forhold var medvirkende til at det ble så vanskelig for deg?

|                                                       | Betydde ingenting        | Betydde litt             | Betydde endel            | Betydde ganske mye       | Betydde svært mye        |
|-------------------------------------------------------|--------------------------|--------------------------|--------------------------|--------------------------|--------------------------|
| <b>C23</b> Personlige forhold                         | <input type="checkbox"/> |
| <b>C24</b> Forhold til familie/ektefelle/partner      | <input type="checkbox"/> |
| <b>C25</b> Sosiale forhold                            | <input type="checkbox"/> |
| <b>C26</b> Problemer i forbindelse med veterinæryrket | <input type="checkbox"/> |
| <b>C27</b> Andre forhold                              | <input type="checkbox"/> |

### Holdninger til aktiv dødshjelp

**Aktiv dødshjelp** er en samlebetegnelse på eutanasi og legeassistert selvmord. I noen europeiske land er aktiv dødshjelp tillatt, men i Norge er det ulovlig.

**Eutanasi** er en leges tilsiktede drap på en person ved å sette en sprøyte med dødbringende medikamenter etter at personen frivillig har bedt om det.

**Legassistert selvmord** er en leges hjelp til selvmord, ved å skaffe til veie medikamenter som personen kan innta selv.

| <b>Ta stilling til følgende påstander</b> |                                                                                                                            | Svært enig               | Litt enig                | Verken enig eller uenig  | Litt uenig               | Svært uenig              |
|-------------------------------------------|----------------------------------------------------------------------------------------------------------------------------|--------------------------|--------------------------|--------------------------|--------------------------|--------------------------|
| <b>C28</b>                                | Legeassistert selvmord bør tillates for personer som har en dødelig sykdom med kort forventet levetid.                     | <input type="checkbox"/> |
| <b>C29</b>                                | Eutanasi bør tillates for personer som har en dødelig sykdom med kort forventet levetid.                                   | <input type="checkbox"/> |
| <b>C30</b>                                | Aktiv dødshjelp bør tillates også for personer som har en uhelbredelig kronisk sykdom, men ikke er døende.                 | <input type="checkbox"/> |
| <b>C31</b>                                | Det finnes tilfeller der det kan være riktig/moralsk forsvarlig av legen å utføre aktiv dødshjelp, selv om det er ulovlig. | <input type="checkbox"/> |

### Holdninger til psykiske lidelser

| <b>Ta stilling til følgende påstander</b> |                                                                                                  | Svært enig               | Noe enig                 | Ikke sikker/ubestemt     | Noe uenig                | Svært uenig              |
|-------------------------------------------|--------------------------------------------------------------------------------------------------|--------------------------|--------------------------|--------------------------|--------------------------|--------------------------|
| <b>C32</b>                                | Behandling kan hjelpe mennesker med psykiske lidelser til å føre et normalt liv.                 | <input type="checkbox"/> |
| <b>C33</b>                                | Folk er generelt sett omsorgsfulle og positivt innstilte overfor personer med psykiske lidelser. | <input type="checkbox"/> |

## D Personlige egenskaper

### Ta stilling til følgende påstander

|                                                                                                                    | Stemmer ikke             | Stemmer                  |
|--------------------------------------------------------------------------------------------------------------------|--------------------------|--------------------------|
| <b>D1</b> Det er vanskelig for meg å stole på folk ettersom de så ofte vender seg mot meg eller lar meg i stikken  | <input type="checkbox"/> | <input type="checkbox"/> |
| <b>D2</b> På en eller annen måte føler jeg at jeg ikke vet hvordan jeg skal oppføre meg sammen med andre mennesker | <input type="checkbox"/> | <input type="checkbox"/> |
| <b>D3</b> Jeg opplever meg selv som helt ulik til ulike tidspunkter                                                | <input type="checkbox"/> | <input type="checkbox"/> |
| <b>D4</b> Jeg føler meg ensom mesteparten av tiden                                                                 | <input type="checkbox"/> | <input type="checkbox"/> |
| <b>D5</b> Folk som virker bra til å begynne med, ender ofte opp med å skuffe meg                                   | <input type="checkbox"/> | <input type="checkbox"/> |
| <b>D6</b> Jeg føler det av og til som om jeg lever i en tåke                                                       | <input type="checkbox"/> | <input type="checkbox"/> |
| <b>D7</b> Noen ganger føler jeg at jeg ikke er meg selv                                                            | <input type="checkbox"/> | <input type="checkbox"/> |
| <b>D8</b> Folk kan oppfatte meg som uhøflig eller hensynsløs uten at jeg skjønner hvorfor                          | <input type="checkbox"/> | <input type="checkbox"/> |
| <b>D9</b> Av og til får jeg rare tanker i hodet som jeg ikke er i stand til å få vekk                              | <input type="checkbox"/> | <input type="checkbox"/> |

### D10 Eventuelle kommentarer til spørreskjemaet?

## Supplementary File 2 – Description of sample for veterinarians with serious suicidal thoughts

| Variable                             | Range of values | Frequency (%) | Mean (SD)   |
|--------------------------------------|-----------------|---------------|-------------|
| <b>Gender</b>                        |                 |               |             |
| Female                               |                 | 108 (79.4%)   |             |
| Male                                 |                 | 28 (20.6 %)   |             |
| <b>Age</b>                           |                 |               |             |
| 20-30                                |                 | 16 (11.7 %)   |             |
| 31-40                                |                 | 47 (34.3 %)   |             |
| 41-50                                |                 | 41 (29.9 %)   |             |
| 51-60                                |                 | 21 (15.3 %)   |             |
| 61-70                                |                 | 10 (7.3 %)    |             |
| >70                                  |                 | 2 (1.5 %)     |             |
| <b>Marital status</b>                |                 |               |             |
| Married/cohabiting                   |                 | 82 (61.2 %)   |             |
| Single/divorced/widow(er)            |                 | 52 (38.8 %)   |             |
| <b>Life events</b>                   | 0-9             |               | 1.3 (1.4)   |
| <b>SCL-5</b>                         | 1-5             |               | 3.3 (1.0)   |
| <b>Reality weakness</b>              | 0-8             |               | 3.2 (2.1)   |
| <b>Alcohol to cope</b>               |                 |               |             |
| Never                                |                 | 73 (53.3 %)   |             |
| Any frequency                        |                 | 64 (46.7 %)   |             |
| <b>Main field of work</b>            |                 |               |             |
| Companion animal practice            |                 | 53 (39.6 %)   |             |
| Public administration                |                 | 21 (15.7 %)   |             |
| Mixed clinical practice              |                 | 13 (9.7 %)    |             |
| Academia/research                    |                 | 11 (8.2 %)    |             |
| Production animal practice           |                 | 11 (8.2 %)    |             |
| Aquaculture                          |                 | 6 (4.5 %)     |             |
| Equine practice                      |                 | 6 (4.5 %)     |             |
| Other                                |                 | 10 (7.5 %)    |             |
| Pensioner                            |                 | 3 (2.2 %)     |             |
| <b>Job stress</b>                    |                 |               |             |
| Emotional demands                    | 1 - 5           |               | 2.44 (0.84) |
| Work/life-balance                    | 1 - 5           |               | 3.22 (0.98) |
| Fear of complaints                   | 1 - 5           |               | 3.63 (1.11) |
| <b>Connection to work-life</b>       |                 |               |             |
| Employed                             |                 | 80 (58.4 %)   |             |
| Self-employed                        |                 | 37 (27.0 %)   |             |
| Other                                |                 | 11 (8.0 %)    |             |
| Two or more connections to work life |                 | 9 (6.6 %)     |             |
| <b>Position type</b>                 |                 |               |             |
| Permanent position                   |                 | 115 (87.8 %)  |             |
| Temporary position                   |                 | 6 (4.6 %)     |             |
| Temporary educational position       |                 | 2 (1.5 %)     |             |
| Other                                |                 | 8 (6.1 %)     |             |
| <b>Working full-time</b>             |                 | 101 (75.4 %)  |             |

|                                                     |  |             |  |
|-----------------------------------------------------|--|-------------|--|
| Frequency of working overtime (weekly or bi-weekly) |  | 92 (71.9 %) |  |
|-----------------------------------------------------|--|-------------|--|

For peer review only

Supplementary File 3 – Additional analysis predictor model – Predictors of serious suicidal thoughts among veterinarians in Norway, without mental distress and reality weakness

|                                                                    | Adjusted <sup>2</sup> |                |
|--------------------------------------------------------------------|-----------------------|----------------|
|                                                                    | OR                    | 95 % CI        |
| Female                                                             | 0.88                  | 0.50 to 1.53   |
| Age                                                                | 1.02                  | 0.92 to 1.13   |
| Single                                                             | 2.17***               | 1.44 to 3.27   |
| Negative life events <sup>1</sup>                                  | 1.61***               | 1.39 to 1.86   |
| Alcohol to cope                                                    | 1.52*                 | 1.02 to 2.27   |
| <b>Main field of work (ref. category= mixed clinical practice)</b> |                       |                |
| Companion animals                                                  | 1.17                  | 0.59 to 2.30   |
| Production animals                                                 | 1.72                  | 0.71 to 4.19   |
| Equine practice                                                    | 1.02                  | 0.34 to 3.04   |
| Aquaculture                                                        | 1.23                  | 0.39 to 3.89   |
| Public administration                                              | 1.47                  | 0.65 to 3.31   |
| Academia/research                                                  | 1.53                  | 0.59 to 4.01   |
| Other                                                              | 0.80                  | 0.29 to 2.17   |
| <b>Job stress</b>                                                  |                       |                |
| Emotional demands                                                  | 1.05*                 | 1.003 to 1.104 |
| Work/life-balance                                                  | 1.08**                | 1.03 to 1.13   |
| Fear of complaints                                                 | 1.08*                 | 1.001 to 1.164 |

<sup>1</sup>The variable life events was entered into the model as a weighted variable ('Negative life events'), comprising the sum score of life events that was significant in a univariate model with the dependent variable.

\*P<0.05

\*\*P<0.01

\*\*\*P<0.001

<sup>2</sup>In the adjusted model, all listed variables were simultaneously entered in the model, i.e. gender, age, civil status, negative life events, use of alcohol to cope, main field of work and the three job stress factors.



1  
2  
3  
4  
5  
6  
7  
8  
9  
10  
11  
12  
13  
14  
15  
16  
17  
18  
19  
20  
21  
22  
23  
24  
25  
26  
27  
28  
29  
30  
31  
32  
33  
34  
35  
36  
37  
38  
39  
40  
41  
42  
43  
44  
45  
46  
47  
48  
49  
50  
51  
52  
53  
54  
55  
56  
57  
58  
59  
60

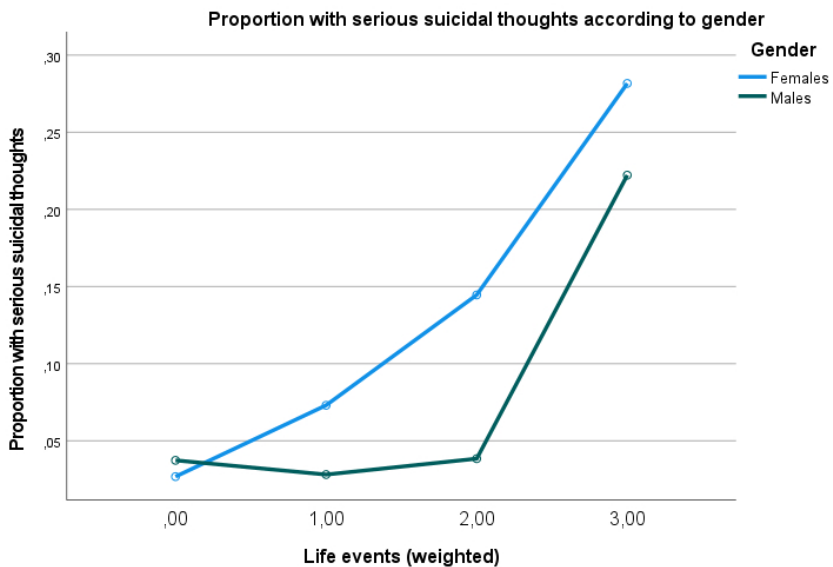

299x176mm (72 x 72 DPI)

1  
2  
3  
4  
5  
6  
7  
8  
9  
10  
11  
12  
13  
14  
15  
16  
17  
18  
19  
20  
21  
22  
23  
24  
25  
26  
27  
28  
29  
30  
31  
32  
33  
34  
35  
36  
37  
38  
39  
40  
41  
42  
43  
44  
45  
46  
47  
48  
49  
50  
51  
52  
53  
54  
55  
56  
57  
58  
59  
60

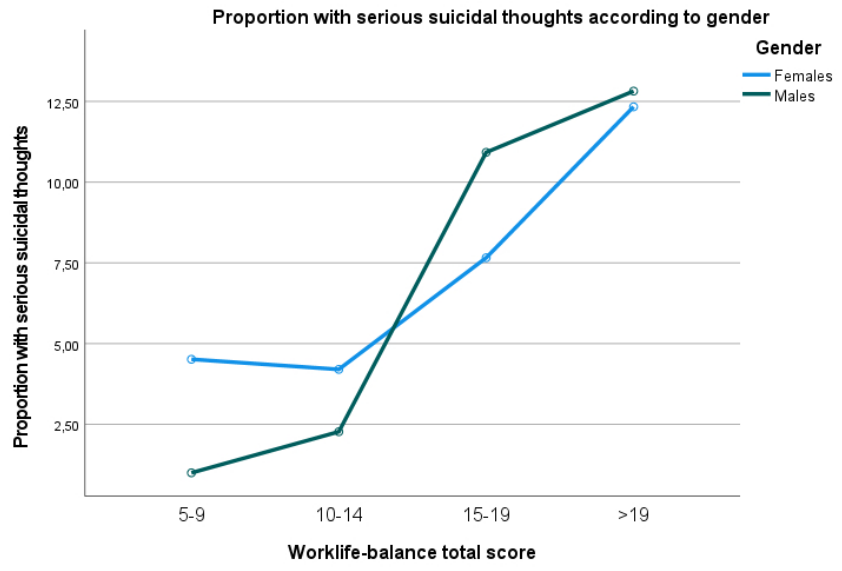

299x176mm (72 x 72 DPI)

**STROBE 2007 (v4) Statement—Checklist of items that should be included in reports of *cross-sectional studies***

| Section/Topic                | Item # | Recommendation                                                                                                                                                                       | Reported on page # |
|------------------------------|--------|--------------------------------------------------------------------------------------------------------------------------------------------------------------------------------------|--------------------|
| <b>Title and abstract</b>    | 1      | (a) Indicate the study's design with a commonly used term in the title or the abstract                                                                                               | 1                  |
|                              |        | (b) Provide in the abstract an informative and balanced summary of what was done and what was found                                                                                  | 2                  |
| <b>Introduction</b>          |        |                                                                                                                                                                                      |                    |
| Background/rationale         | 2      | Explain the scientific background and rationale for the investigation being reported                                                                                                 | 4-5                |
| Objectives                   | 3      | State specific objectives, including any prespecified hypotheses                                                                                                                     | 5                  |
| <b>Methods</b>               |        |                                                                                                                                                                                      |                    |
| Study design                 | 4      | Present key elements of study design early in the paper                                                                                                                              | 5                  |
| Setting                      | 5      | Describe the setting, locations, and relevant dates, including periods of recruitment, exposure, follow-up, and data collection                                                      | 5                  |
| Participants                 | 6      | (a) Give the eligibility criteria, and the sources and methods of selection of participants                                                                                          | 5                  |
| Variables                    | 7      | Clearly define all outcomes, exposures, predictors, potential confounders, and effect modifiers. Give diagnostic criteria, if applicable                                             | 6-8                |
| Data sources/<br>measurement | 8*     | For each variable of interest, give sources of data and details of methods of assessment (measurement). Describe comparability of assessment methods if there is more than one group | 6-8                |
| Bias                         | 9      | Describe any efforts to address potential sources of bias                                                                                                                            | 6                  |
| Study size                   | 10     | Explain how the study size was arrived at                                                                                                                                            | 6                  |
| Quantitative variables       | 11     | Explain how quantitative variables were handled in the analyses. If applicable, describe which groupings were chosen and why                                                         | 6-8                |
| Statistical methods          | 12     | (a) Describe all statistical methods, including those used to control for confounding                                                                                                | 8                  |
|                              |        | (b) Describe any methods used to examine subgroups and interactions                                                                                                                  | 8                  |
|                              |        | (c) Explain how missing data were addressed                                                                                                                                          | 8                  |
|                              |        | (d) If applicable, describe analytical methods taking account of sampling strategy                                                                                                   | NA                 |
|                              |        | (e) Describe any sensitivity analyses                                                                                                                                                | NA                 |
| <b>Results</b>               |        |                                                                                                                                                                                      |                    |

|                          |     |                                                                                                                                                                                                              |       |
|--------------------------|-----|--------------------------------------------------------------------------------------------------------------------------------------------------------------------------------------------------------------|-------|
| Participants             | 13* | (a) Report numbers of individuals at each stage of study—eg numbers potentially eligible, examined for eligibility, confirmed eligible, included in the study, completing follow-up, and analysed            | NA    |
|                          |     | (b) Give reasons for non-participation at each stage                                                                                                                                                         | NA    |
|                          |     | (c) Consider use of a flow diagram                                                                                                                                                                           | NA    |
| Descriptive data         | 14* | (a) Give characteristics of study participants (eg demographic, clinical, social) and information on exposures and potential confounders                                                                     | 9-11  |
|                          |     | (b) Indicate number of participants with missing data for each variable of interest                                                                                                                          | 9-14  |
| Outcome data             | 15* | Report numbers of outcome events or summary measures                                                                                                                                                         | 9-14  |
| Main results             | 16  | (a) Give unadjusted estimates and, if applicable, confounder-adjusted estimates and their precision (eg, 95% confidence interval). Make clear which confounders were adjusted for and why they were included | 13-14 |
|                          |     | (b) Report category boundaries when continuous variables were categorized                                                                                                                                    | NA    |
|                          |     | (c) If relevant, consider translating estimates of relative risk into absolute risk for a meaningful time period                                                                                             | NA    |
| Other analyses           | 17  | Report other analyses done—eg analyses of subgroups and interactions, and sensitivity analyses                                                                                                               | 13-14 |
| <b>Discussion</b>        |     |                                                                                                                                                                                                              |       |
| Key results              | 18  | Summarise key results with reference to study objectives                                                                                                                                                     | 15    |
| Limitations              | 19  | Discuss limitations of the study, taking into account sources of potential bias or imprecision. Discuss both direction and magnitude of any potential bias                                                   | 17    |
| Interpretation           | 20  | Give a cautious overall interpretation of results considering objectives, limitations, multiplicity of analyses, results from similar studies, and other relevant evidence                                   | 15-17 |
| Generalisability         | 21  | Discuss the generalisability (external validity) of the study results                                                                                                                                        | 17    |
| <b>Other information</b> |     |                                                                                                                                                                                                              |       |
| Funding                  | 22  | Give the source of funding and the role of the funders for the present study and, if applicable, for the original study on which the present article is based                                                | 19    |

\*Give information separately for cases and controls in case-control studies and, if applicable, for exposed and unexposed groups in cohort and cross-sectional studies.

**Note:** An Explanation and Elaboration article discusses each checklist item and gives methodological background and published examples of transparent reporting. The STROBE checklist is best used in conjunction with this article (freely available on the Web sites of PLoS Medicine at <http://www.plosmedicine.org/>, Annals of Internal Medicine at <http://www.annals.org/>, and Epidemiology at <http://www.epidem.com/>). Information on the STROBE Initiative is available at [www.strobe-statement.org](http://www.strobe-statement.org).
