# Supplementary material for: Prevalence and individual and work-related factors associated with suicidal thoughts and behaviours among veterinarians in Norway: a cross-sectional, nationwide survey-based study (the NORVET study)
Source: HighWire-hosted journal article supplement (doi:10.1136/bmjopen-2021-055827), 2022-01-01
Supplement: bmjopen-2021-055827supp001_data_supplement.pdf [file bmjopen-2021-055827supp001_data_supplement.pdf]

# NORVET-undersøkelsen

## Arbeid, trivsel og mental helse hos veterinærer i Norge

På de fleste spørsmålene skal du angi svar ved å sette et kryss i en rute slik   
Vennligst benytt en penn og sett krysset tydelig i ruten.

Noen steder skal du sette tall eller bokstaver i en eller flere ruter, slik  eller slik

Skjemaene vil bli lest maskinelt, derfor er det viktig at du skriver tydelig i rutene.

Det er svært viktig at du velger å merke av bare ett svaralternativ, der ikke annet fremgår av teksten. Hvis to alternativer synes like dekkende, bes du velge det ene. Dette vil jevne seg ut på gruppenivå.

Selv om det kanskje er noen spørsmål du synes er mindre viktige, ber vi deg svare likevel. Det vil bidra til å styrke undersøkelsen.

Det vil være en del spørsmål som blir gjentatt flere ganger i skjemaet. Dette skyldes at de utgjør en integrert del av standardiserte måleinstrumenter. Noen ganger spørres det også om opplysninger for ulike tidsperioder. Dette gjøres for å kunne foreta pålitelige sammenligninger med flere andre grupper, nasjonalt og internasjonalt.

**LYKKE TIL, OG PÅ FORHÅND TUSEN TAKK FOR INNSATSEN!**

## A. BAKGRUNNSOPPLYSNINGER

|                                                                                                                                                                                                                                                                                                                                                    |                                                                      |
|----------------------------------------------------------------------------------------------------------------------------------------------------------------------------------------------------------------------------------------------------------------------------------------------------------------------------------------------------|----------------------------------------------------------------------|
| <b>A1 Kjønn:</b>                                                                                                                                                                                                                                                                                                                                   | <b>A3 Nåværende sivilstatus</b>                                      |
| <input type="checkbox"/> Kvinne                                                                                                                                                                                                                                                                                                                    | <input type="checkbox"/> Ugift <input type="checkbox"/> Separert     |
| <input type="checkbox"/> Mann                                                                                                                                                                                                                                                                                                                      | <input type="checkbox"/> Samboende <input type="checkbox"/> Skilt    |
| <input type="checkbox"/> Annen kjønnsidentitet                                                                                                                                                                                                                                                                                                     | <input type="checkbox"/> Gift <input type="checkbox"/> Enke/enkemann |
| <b>A2 Alder:</b>                                                                                                                                                                                                                                                                                                                                   |                                                                      |
| <input type="checkbox"/> 20-25 <input type="checkbox"/> 26-30 <input type="checkbox"/> 31-35 <input type="checkbox"/> 36-40 <input type="checkbox"/> 41-45 <input type="checkbox"/> 46-50 <input type="checkbox"/> 51-55 <input type="checkbox"/> 56-60 <input type="checkbox"/> 61-65 <input type="checkbox"/> 66-70 <input type="checkbox"/> >70 |                                                                      |
| <b><u>Partner</u></b>                                                                                                                                                                                                                                                                                                                              |                                                                      |
| <b>A4 Har du fast partner (kjæreste/samboer/ektefelle)?</b>                                                                                                                                                                                                                                                                                        | <b>A5 Hvis JA, er din partner i arbeid?</b>                          |
| <input type="checkbox"/> Nei                                                                                                                                                                                                                                                                                                                       | <input type="checkbox"/> Nei                                         |
| <input type="checkbox"/> Ja                                                                                                                                                                                                                                                                                                                        | <input type="checkbox"/> Ja                                          |
|                                                                                                                                                                                                                                                                                                                                                    | <b>A6 Hvis JA, er din partner veterinær?</b>                         |
|                                                                                                                                                                                                                                                                                                                                                    | <input type="checkbox"/> Nei                                         |
|                                                                                                                                                                                                                                                                                                                                                    | <input type="checkbox"/> Ja                                          |
| <b><u>Barn og familie</u></b>                                                                                                                                                                                                                                                                                                                      |                                                                      |
| <b>A7 Hvor mange barn har du?</b>                                                                                                                                                                                                                                                                                                                  |                                                                      |
| <input type="checkbox"/> Ingen <input type="checkbox"/> 1 barn <input type="checkbox"/> 2 barn <input type="checkbox"/> 3 eller flere barn                                                                                                                                                                                                         |                                                                      |

### HAR DU I LØPET AV DE SISTE 12 MND. OPPLEVD NOE AV DET FØLGENDE?

|                                                                                                          |                          |                                                                                     |                          |
|----------------------------------------------------------------------------------------------------------|--------------------------|-------------------------------------------------------------------------------------|--------------------------|
| <b>A8</b> En alvorlig sykdom eller ulykke                                                                | <input type="checkbox"/> | <b>A18</b> Samlivsproblemer                                                         | <input type="checkbox"/> |
| <b>A9</b> Skilsmisse/separasjon med samboer eller kjæreste                                               | <input type="checkbox"/> | <b>A19</b> Flyttet fra foreldre                                                     | <input type="checkbox"/> |
| <b>A10</b> Giftet deg/flyttet sammen med samboer                                                         | <input type="checkbox"/> | <b>A20</b> Permisjon                                                                | <input type="checkbox"/> |
| <b>A11</b> Fått barn                                                                                     | <input type="checkbox"/> | <b>A21</b> Sykefravær 21 dager eller mer                                            | <input type="checkbox"/> |
| <b>A12</b> Dødsfall familie/nære venner                                                                  | <input type="checkbox"/> | <b>A22</b> Du selv har vært involvert i tilsynssak fra tilsynsmyndigheter           | <input type="checkbox"/> |
| <b>A13</b> Andre vansker hos nær familie                                                                 | <input type="checkbox"/> | <b>A23</b> Alvorlig sykdom hos et nærtstående familiemedlem (partner/barn/foreldre) | <input type="checkbox"/> |
| <b>A14</b> Alvorlige økonomiske problemer                                                                | <input type="checkbox"/> | <b>A24</b> Andre alvorlige hendelser<br>Spesifiser:                                 | <input type="checkbox"/> |
| <b>A15</b> Ektefelle har vært arbeidsløs/permittert                                                      | <input type="checkbox"/> |                                                                                     |                          |
| <b>A16</b> Alvorlige bomessige problemer                                                                 | <input type="checkbox"/> |                                                                                     |                          |
| <b>A17</b> Du selv, eller noen i nær familie, har vært utsatt for, eller innblandet i, alvorlig lovbrudd | <input type="checkbox"/> |                                                                                     |                          |

## B. ARBEIDSFORHOLD OG ARBEIDSBELASTNING

### Hovedstilling

#### B1 Hvilken tilknytningsform har du til arbeidslivet?

- Ansatt  Selvstendig næringsdrivende  Annet, spesifiser: \_\_\_\_\_

#### B2 Har du en lederrolle?

- Ja  Nei

#### B3 Hva slags hovedstilling har du nå?

- Smådyrpraksis  
 Produksjonsdyrpraksis  
 Kombinertpraksis  
 Hestepraksis  
 Akvakultur  
 Offentlig forvaltning  
 Akademia/forskning  
 Pensjonist  
 Annet, eventuelt spesifiser: \_\_\_\_\_

#### B3a Hva slags stilling er dette?

- Fast stilling  
 Tidsbegrenset utdanningsstilling  
 Vikariat      Hvis vikariat, fyll inn antall mnd     
 Annet      (samlet lengde)

#### B3b Jobber du i

- Bedrift som er del av kjede  Frittstående bedrift

#### B4 Hvor mange måneder har du vært i din nåværende stilling? I ca. måneder

### Arbeidstidsforhold

#### B5 Hvor mange prosent er din hovedstilling?

Angi prosent:  
   %

#### B6 Hvor lang er din fastlagte arbeidstid i timer per uke i din hovedstilling?

timer og   minutter pr uke

#### B7 Hvor mange timer jobber du faktisk i gjennomsnitt pr. uke (inkludert alle stillinger)?

timer

#### B8 I en gjennomsnittlig arbeidsuke, inkludert ev. bistilling(er), omtrent hvor mange timer pr. uke bruker du på:

- |                    |                                                 |                      |                                                 |
|--------------------|-------------------------------------------------|----------------------|-------------------------------------------------|
| 1.1 Klinisk arbeid | <input type="text"/> <input type="text"/> timer | 1.2 Møtevirksomhet   | <input type="text"/> <input type="text"/> timer |
| 1.3 Papirarbeid    | <input type="text"/> <input type="text"/> timer | 1.4 Telefoner/e-post | <input type="text"/> <input type="text"/> timer |
| 1.5 Reisetid       | <input type="text"/> <input type="text"/> timer | 1.6 Totalt           | <input type="text"/> <input type="text"/> timer |

**B9** Hvor mange timer overtid har du i gjennomsnitt i din hovedstilling i en vanlig arbeidsuke? (Ikke forlenget arbeidstid eller utrykning på vakt, kun tilfeldig overtid.)

Betalt:

Ubetalt:

timer pr. uke

timer pr. uke

**B10** Hvor ofte har du overtidarbeid/forlenget arbeidstid (betalt eller ubetalt)?

- Aldri
- Sjeldnere enn en gang i måneden
- Minst en gang i måneden
- Omtrent annenhver uke
- Hver uke

### Bistilling

**B11** Har du noen fast bistilling eller ekstrajobb i tillegg til din hovedstilling?

- Nei
- Ja

**B12** Hvis du har en bistilling, hvor mange arbeidstimer utgjør denne stillingen gjennomsnittlig pr. uke?

timer pr. uke

### Vakter som veterinær

**B13** Hvis du har faste vakter ut over normal arbeidstid i din hovedstilling, hva slags vaktordning har du nå?

- Tar ikke faste vakter \*     9-delt                      \*Gå til spørsmål B18
- 2-3-delt                       10-delt
- 4-5-delt                       11-delt
- 6-7-delt                       >12-delt
- 8-delt

**B14** Hvilken type vaktordning deltar du i?

- Offentlig vakt     Privat vakt

**B15** Hvis du tar faste vakter ut over normal arbeidstid i din hovedstilling, hvor lange er vaktene?

- Ca 1/2 døgn
- Ca. 1 døgn
- Mer enn 1 døgn
- Annet; hva \_\_\_\_\_

**B16 Ca. hvor mange timer av dine faste vakter tilbringer du**

- Aktiv:   timer Har du  tilstedevakt eller  hjemmevakt
- Hvilende:   timer
- Sovende:   timer

**B17 Hvis du har faste vakter, cirka hvor lenge arbeider du dagen etter vakt?**

- Arbeider ikke rett etter vakt
- 1-3 timer
- 4-6 timer
- 7 timer eller mer

**B18 Hvis du har vakter som en del av en bistilling, cirka hvor mange timer av disse vaktene tilbringer du**

*Hvis du ikke har vakt som del av bistilling, gå til B19*

- Aktiv:   timer
- Hvilende:   timer Har du  tilstedevakt eller  hjemmevakt
- Sovende:   timer

**B19 Cirka hvor mange avspaseringsuker pr. halvår benytter du til ikke-faglig aktivitet?**

- Ingen uke
- 1 uke
- 2 uker
- 3 uker
- 4 uker
- 5 uker
- 6 uker eller flere

**B20 Dersom du jobber i klinisk praksis, hvor mange avlivinger utfører du omtrent på en vanlig uke?**

- 0-4
- 5-9
- 10-14
- 15 eller fler

**Belastningsfaktorer**

**I hvilken grad gjør de følgende situasjoner/faktorer deg belastet (stresset)?**

Sett ett kryss i den ruten som passer best for deg.

|                                                                         | Ikke noen belastning     | Litt belastning          | Endel belastning         | Mye belastning           | Svært mye belastning     |
|-------------------------------------------------------------------------|--------------------------|--------------------------|--------------------------|--------------------------|--------------------------|
| <b>B21</b> Kritikk av veterinærer i media                               | <input type="checkbox"/> | <input type="checkbox"/> | <input type="checkbox"/> | <input type="checkbox"/> | <input type="checkbox"/> |
| <b>B22</b> Kundene/dyreeierne setter ikke pris på det du gjør           | <input type="checkbox"/> | <input type="checkbox"/> | <input type="checkbox"/> | <input type="checkbox"/> | <input type="checkbox"/> |
| <b>B23</b> Bekymring over klager fra kunder/dyreeiere                   | <input type="checkbox"/> | <input type="checkbox"/> | <input type="checkbox"/> | <input type="checkbox"/> | <input type="checkbox"/> |
| <b>B24</b> Å ha ansvar for dyrenes liv 24 timer i døgnet                | <input type="checkbox"/> | <input type="checkbox"/> | <input type="checkbox"/> | <input type="checkbox"/> | <input type="checkbox"/> |
| <b>B25</b> Telefoner, sykebesøk og utrykning om natten                  | <input type="checkbox"/> | <input type="checkbox"/> | <input type="checkbox"/> | <input type="checkbox"/> | <input type="checkbox"/> |
| <b>B26</b> Å ta seg av vanskelige veterinærmedisinske problemstillinger | <input type="checkbox"/> | <input type="checkbox"/> | <input type="checkbox"/> | <input type="checkbox"/> | <input type="checkbox"/> |
| <b>B27</b> Å ta seg av vanskelige kunder/dyreeiere                      | <input type="checkbox"/> | <input type="checkbox"/> | <input type="checkbox"/> | <input type="checkbox"/> | <input type="checkbox"/> |
| <b>B28</b> Krysspress mellom økonomi og dyrevelferd/etikk               | <input type="checkbox"/> | <input type="checkbox"/> | <input type="checkbox"/> | <input type="checkbox"/> | <input type="checkbox"/> |
| <b>B29</b> Bekymringer knyttet til egen økonomi                         | <input type="checkbox"/> | <input type="checkbox"/> | <input type="checkbox"/> | <input type="checkbox"/> | <input type="checkbox"/> |
| <b>B30</b> Bekymringer knyttet til bedriftens økonomi                   | <input type="checkbox"/> | <input type="checkbox"/> | <input type="checkbox"/> | <input type="checkbox"/> | <input type="checkbox"/> |
| <b>B31</b> Sykejournaler og annet papirarbeid                           | <input type="checkbox"/> | <input type="checkbox"/> | <input type="checkbox"/> | <input type="checkbox"/> | <input type="checkbox"/> |
| <b>B32</b> Kirurgiske inngrep                                           | <input type="checkbox"/> | <input type="checkbox"/> | <input type="checkbox"/> | <input type="checkbox"/> | <input type="checkbox"/> |
| <b>B33</b> Arbeidsmiljøet                                               | <input type="checkbox"/> | <input type="checkbox"/> | <input type="checkbox"/> | <input type="checkbox"/> | <input type="checkbox"/> |
| <b>B34</b> Tidspress                                                    | <input type="checkbox"/> | <input type="checkbox"/> | <input type="checkbox"/> | <input type="checkbox"/> | <input type="checkbox"/> |
| <b>B35</b> Jobben går ut over familieliv                                | <input type="checkbox"/> | <input type="checkbox"/> | <input type="checkbox"/> | <input type="checkbox"/> | <input type="checkbox"/> |
| <b>B36</b> Jobben går ut over sosialt liv                               | <input type="checkbox"/> | <input type="checkbox"/> | <input type="checkbox"/> | <input type="checkbox"/> | <input type="checkbox"/> |
| <b>B37</b> Daglig kontakt med døende og kritisk syke dyr                | <input type="checkbox"/> | <input type="checkbox"/> | <input type="checkbox"/> | <input type="checkbox"/> | <input type="checkbox"/> |
| <b>B38</b> Å ta seg av dødssyke dyr og deres eiere                      | <input type="checkbox"/> | <input type="checkbox"/> | <input type="checkbox"/> | <input type="checkbox"/> | <input type="checkbox"/> |
| <b>B39</b> Forespørsler om dyr fra venner og bekjente                   | <input type="checkbox"/> | <input type="checkbox"/> | <input type="checkbox"/> | <input type="checkbox"/> | <input type="checkbox"/> |
| <b>B40</b> Forespørsler om dyr fra slektninger                          | <input type="checkbox"/> | <input type="checkbox"/> | <input type="checkbox"/> | <input type="checkbox"/> | <input type="checkbox"/> |
| <b>B41</b> Være i generell beredskap                                    | <input type="checkbox"/> | <input type="checkbox"/> | <input type="checkbox"/> | <input type="checkbox"/> | <input type="checkbox"/> |

|                                                                                           | Ikke noen belastning     | Litt belastning          | Endel belastning         | Mye belastning           | Svært mye belastning     |
|-------------------------------------------------------------------------------------------|--------------------------|--------------------------|--------------------------|--------------------------|--------------------------|
| <b>B42</b> Følelsesmessig engasjement i dyrene                                            | <input type="checkbox"/> | <input type="checkbox"/> | <input type="checkbox"/> | <input type="checkbox"/> | <input type="checkbox"/> |
| <b>B43</b> Forventninger om at veterinæren også skal hjelpe med ikke-medisinske problemer | <input type="checkbox"/> | <input type="checkbox"/> | <input type="checkbox"/> | <input type="checkbox"/> | <input type="checkbox"/> |
| <b>B44</b> Avbrytelser og mas i arbeidssituasjonen                                        | <input type="checkbox"/> | <input type="checkbox"/> | <input type="checkbox"/> | <input type="checkbox"/> | <input type="checkbox"/> |
| <b>B45</b> Å ta seg av lidende dyr                                                        | <input type="checkbox"/> | <input type="checkbox"/> | <input type="checkbox"/> | <input type="checkbox"/> | <input type="checkbox"/> |
| <b>B46</b> Konflikt med kolleger/medarbeidere                                             | <input type="checkbox"/> | <input type="checkbox"/> | <input type="checkbox"/> | <input type="checkbox"/> | <input type="checkbox"/> |
| <b>B47</b> Å få til en balanse mellom arbeid og privatliv                                 | <input type="checkbox"/> | <input type="checkbox"/> | <input type="checkbox"/> | <input type="checkbox"/> | <input type="checkbox"/> |

**Forhold til kolleger**

|                                                                                  | Ingen grad               |                          |                          |                          | I svært høy grad         |                          |                          |                          |
|----------------------------------------------------------------------------------|--------------------------|--------------------------|--------------------------|--------------------------|--------------------------|--------------------------|--------------------------|--------------------------|
| <b>B48</b> I hvilken grad trives du i det store og det hele blant dine kolleger? | <input type="checkbox"/> | <input type="checkbox"/> | <input type="checkbox"/> | <input type="checkbox"/> | <input type="checkbox"/> | <input type="checkbox"/> | <input type="checkbox"/> | <input type="checkbox"/> |
| <b>B49</b> I hvor stor grad har du følt deg ivaretatt av dine veterinærkolleger? | <input type="checkbox"/> | <input type="checkbox"/> | <input type="checkbox"/> | <input type="checkbox"/> | <input type="checkbox"/> | <input type="checkbox"/> | <input type="checkbox"/> | <input type="checkbox"/> |
|                                                                                  | Stemmer helt             |                          | Stemmer ganske bra       |                          | Stemmer ikke særlig bra  |                          | Stemmer ikke             |                          |
| <b>B50</b> Det er rolig og behagelig stemning på min arbeidsplass                | <input type="checkbox"/> | <input type="checkbox"/> | <input type="checkbox"/> | <input type="checkbox"/> | <input type="checkbox"/> | <input type="checkbox"/> | <input type="checkbox"/> | <input type="checkbox"/> |
| <b>B51</b> Det er godt samhold                                                   | <input type="checkbox"/> | <input type="checkbox"/> | <input type="checkbox"/> | <input type="checkbox"/> | <input type="checkbox"/> | <input type="checkbox"/> | <input type="checkbox"/> | <input type="checkbox"/> |
| <b>B52</b> Mine arbeidskolleger stiller opp for meg                              | <input type="checkbox"/> | <input type="checkbox"/> | <input type="checkbox"/> | <input type="checkbox"/> | <input type="checkbox"/> | <input type="checkbox"/> | <input type="checkbox"/> | <input type="checkbox"/> |
| <b>B53</b> Det er forståelse for at jeg kan ha en dårlig dag                     | <input type="checkbox"/> | <input type="checkbox"/> | <input type="checkbox"/> | <input type="checkbox"/> | <input type="checkbox"/> | <input type="checkbox"/> | <input type="checkbox"/> | <input type="checkbox"/> |
| <b>B54</b> Jeg kommer godt overens med mine overordnede*                         | <input type="checkbox"/> | <input type="checkbox"/> | <input type="checkbox"/> | <input type="checkbox"/> | <input type="checkbox"/> | <input type="checkbox"/> | <input type="checkbox"/> | <input type="checkbox"/> |
| <b>B55</b> Jeg trives bra med mine arbeidskolleger                               | <input type="checkbox"/> | <input type="checkbox"/> | <input type="checkbox"/> | <input type="checkbox"/> | <input type="checkbox"/> | <input type="checkbox"/> | <input type="checkbox"/> | <input type="checkbox"/> |

*\*Besvares bare dersom du har en overordnet.*

**B56** Når du føler deg bekymret, engstelig eller nervøs - drikker du noen gang alkohol for å klare situasjonen bedre?

Aldri  Sjelden  Av og til  Ofte

| <b><u>Vedrørende ditt arbeid</u></b> |                                                                                  | Meget sjelden eller aldri | Nokså sjelden            | Av og til                | Nokså ofte               | Meget ofte eller alltid  |
|--------------------------------------|----------------------------------------------------------------------------------|---------------------------|--------------------------|--------------------------|--------------------------|--------------------------|
| <b>B57</b>                           | Er det fastsatt klare mål for din jobb?                                          | <input type="checkbox"/>  | <input type="checkbox"/> | <input type="checkbox"/> | <input type="checkbox"/> | <input type="checkbox"/> |
| <b>B58</b>                           | Vet du hva som er ditt ansvarsområde?                                            | <input type="checkbox"/>  | <input type="checkbox"/> | <input type="checkbox"/> | <input type="checkbox"/> | <input type="checkbox"/> |
| <b>B59</b>                           | Vet du nøyaktig hva som forventes av deg i jobben?                               | <input type="checkbox"/>  | <input type="checkbox"/> | <input type="checkbox"/> | <input type="checkbox"/> | <input type="checkbox"/> |
| <b>B60</b>                           | Må du gjøre ting du mener burde vært gjort annerledes?                           | <input type="checkbox"/>  | <input type="checkbox"/> | <input type="checkbox"/> | <input type="checkbox"/> | <input type="checkbox"/> |
| <b>B61</b>                           | Får du oppgaver uten tilstrekkelig hjelpemidler og ressurser til å fullføre dem? | <input type="checkbox"/>  | <input type="checkbox"/> | <input type="checkbox"/> | <input type="checkbox"/> | <input type="checkbox"/> |
| <b>B62</b>                           | Mottar du motstridende forespørsler fra to eller flere personer?                 | <input type="checkbox"/>  | <input type="checkbox"/> | <input type="checkbox"/> | <input type="checkbox"/> | <input type="checkbox"/> |
| <b>B63</b>                           | Fordele din nærmeste sjef arbeidsoppgaver rettferdig og upartisk?*               | <input type="checkbox"/>  | <input type="checkbox"/> | <input type="checkbox"/> | <input type="checkbox"/> | <input type="checkbox"/> |
| <b>B64</b>                           | Behandler din nærmeste sjef de ansatte rettferdig og upartisk?*                  | <input type="checkbox"/>  | <input type="checkbox"/> | <input type="checkbox"/> | <input type="checkbox"/> | <input type="checkbox"/> |
| <b>B65</b>                           | Er forholdet mellom deg og din nærmeste sjef en kilde til stress for deg?*       | <input type="checkbox"/>  | <input type="checkbox"/> | <input type="checkbox"/> | <input type="checkbox"/> | <input type="checkbox"/> |

\*Besvares bare dersom du har en overordnet.

|            |                                                                  | Ja, ofte                 | Ja, noen ganger          | Nei, sjelden             | Nei, så godt som aldri   |
|------------|------------------------------------------------------------------|--------------------------|--------------------------|--------------------------|--------------------------|
| <b>B66</b> | Krever arbeidet ditt at du arbeider meget raskt?                 | <input type="checkbox"/> | <input type="checkbox"/> | <input type="checkbox"/> | <input type="checkbox"/> |
| <b>B67</b> | Krever arbeidet ditt at du arbeider meget hardt?                 | <input type="checkbox"/> | <input type="checkbox"/> | <input type="checkbox"/> | <input type="checkbox"/> |
| <b>B68</b> | Krever arbeidet ditt for stor arbeidsinnsats?                    | <input type="checkbox"/> | <input type="checkbox"/> | <input type="checkbox"/> | <input type="checkbox"/> |
| <b>B69</b> | Har du tilstrekkelig tid til å utføre arbeidsoppgavene dine?     | <input type="checkbox"/> | <input type="checkbox"/> | <input type="checkbox"/> | <input type="checkbox"/> |
| <b>B70</b> | Forekommer det ofte motstridende krav i arbeidet ditt?           | <input type="checkbox"/> | <input type="checkbox"/> | <input type="checkbox"/> | <input type="checkbox"/> |
| <b>B71</b> | Får du lære nye ting i ditt arbeid?                              | <input type="checkbox"/> | <input type="checkbox"/> | <input type="checkbox"/> | <input type="checkbox"/> |
| <b>B72</b> | Krever ditt arbeid dyktighet?                                    | <input type="checkbox"/> | <input type="checkbox"/> | <input type="checkbox"/> | <input type="checkbox"/> |
| <b>B73</b> | Krever ditt arbeid oppfinnsomhet/kreativitet?                    | <input type="checkbox"/> | <input type="checkbox"/> | <input type="checkbox"/> | <input type="checkbox"/> |
| <b>B74</b> | Innebærer ditt arbeid at du gjør samme ting om og om igjen?      | <input type="checkbox"/> | <input type="checkbox"/> | <input type="checkbox"/> | <input type="checkbox"/> |
| <b>B75</b> | Har du frihet til å bestemme hvordan ditt arbeid skal utføres?   | <input type="checkbox"/> | <input type="checkbox"/> | <input type="checkbox"/> | <input type="checkbox"/> |
| <b>B76</b> | Har du frihet til å bestemme hva som skal utføres i ditt arbeid? | <input type="checkbox"/> | <input type="checkbox"/> | <input type="checkbox"/> | <input type="checkbox"/> |



## C HELSE

Nedenfor finner du en oppstilling av plager som man av og til har.  
Les nøye gjennom dem, en for en, og angi deretter hvor mye hvert enkelt problem har plaget deg eller vært til besvær i løpet av de siste 14 dagene

|                                                       | Ikke i det hele tatt     | Litt                     | Måtelig                  | Ganske mye               | Veldig mye               |
|-------------------------------------------------------|--------------------------|--------------------------|--------------------------|--------------------------|--------------------------|
| <b>C1</b> Nervøsitet, indre uro                       | <input type="checkbox"/> | <input type="checkbox"/> | <input type="checkbox"/> | <input type="checkbox"/> | <input type="checkbox"/> |
| <b>C2</b> Stadig redd eller engstelig                 | <input type="checkbox"/> | <input type="checkbox"/> | <input type="checkbox"/> | <input type="checkbox"/> | <input type="checkbox"/> |
| <b>C3</b> Følelse av håpløshet med tanke på fremtiden | <input type="checkbox"/> | <input type="checkbox"/> | <input type="checkbox"/> | <input type="checkbox"/> | <input type="checkbox"/> |
| <b>C4</b> Mye bekymret eller urolig                   | <input type="checkbox"/> | <input type="checkbox"/> | <input type="checkbox"/> | <input type="checkbox"/> | <input type="checkbox"/> |
| <b>C5</b> Nedtrykt, tungsindig                        | <input type="checkbox"/> | <input type="checkbox"/> | <input type="checkbox"/> | <input type="checkbox"/> | <input type="checkbox"/> |

**C6 Hvis du har hatt psykiske problemer i løpet av det siste året, har du da søkt/fått hjelp for dette?**

- Ikke hatt psykiske problemer av betydning\* *\*Gå til spørsmål C13*
- Har ikke søkt hjelp selv om jeg nok kunne ha hatt behov for det
- Ja, har konsultert allmennlege eller fastlege
- Ja, har konsultert psykolog/psykiater
- Ja, har vært innlagt i psykiatrisk avdeling

**C7 Hvis du har vært i kontakt med psykolog/psykiater, hva slags behandling har du fått?**

*Det er mulig å sette flere klyss*

- 1-5 samtaler
- Flere enn 5 samtaler
- Psykoterapi/psykoanalyse
- Gruppeterapi
- Medikamentell behandling

**Hvis du har hatt psykiske problemer i løpet av det siste året, i hvilken grad mener du at følgende forhold var medvirkende til at det ble vanskelig for deg?**

|                                                       | Betydde ingenting        | Betydde litt             | Betydde endel            | Betydde ganske mye       | Betydde svært mye        |
|-------------------------------------------------------|--------------------------|--------------------------|--------------------------|--------------------------|--------------------------|
| <b>C8</b> Personlige forhold                          | <input type="checkbox"/> | <input type="checkbox"/> | <input type="checkbox"/> | <input type="checkbox"/> | <input type="checkbox"/> |
| <b>C9</b> Forhold til familie/ektefelle/partner       | <input type="checkbox"/> | <input type="checkbox"/> | <input type="checkbox"/> | <input type="checkbox"/> | <input type="checkbox"/> |
| <b>C10</b> Sosiale forhold                            | <input type="checkbox"/> | <input type="checkbox"/> | <input type="checkbox"/> | <input type="checkbox"/> | <input type="checkbox"/> |
| <b>C11</b> Problemer i forbindelse med veterinæryrket | <input type="checkbox"/> | <input type="checkbox"/> | <input type="checkbox"/> | <input type="checkbox"/> | <input type="checkbox"/> |
| <b>C12</b> Andre forhold                              | <input type="checkbox"/> | <input type="checkbox"/> | <input type="checkbox"/> | <input type="checkbox"/> | <input type="checkbox"/> |

**Livslyst**

De følgende spørsmål dreier seg om du i løpet av det siste året har mistet livslysten, og i så fall i hvilken grad?

**C13** Har du noen gang i løpet av det siste året følt at livet ikke er verdt å leve?

Aldri  Nesten aldri  Noen ganger  Mange ganger

**C14** Har du i løpet av det siste året ønsket at du var død - f.eks. at du skulle sovne inn og aldri våkne igjen?

Aldri  Nesten aldri  Noen ganger  Mange ganger

**C15** Har du noen gang i løpet av det siste året tenkt på å ta livet ditt, selv om du vet at du ikke vil gjøre det?

Aldri  Nesten aldri  Noen ganger  Mange ganger

**C16** Har du noen gang i løpet av det siste året vært i den situasjonen at du alvorlig har overveiet å ta livet ditt og til og med planlagt hvordan du i såfall skulle gjøre det?

Aldri  Nesten aldri  Noen ganger  Mange ganger

Hvis det har hendt, i hvilken grad mener du de følgende forhold var medvirkende til at det ble så vanskelig for deg?

|                                                       | Betydde ingenting        | Betydde litt             | Betydde endel            | Betydde ganske mye       | Betydde svært mye        |
|-------------------------------------------------------|--------------------------|--------------------------|--------------------------|--------------------------|--------------------------|
| <b>C17</b> Personlige forhold                         | <input type="checkbox"/> | <input type="checkbox"/> | <input type="checkbox"/> | <input type="checkbox"/> | <input type="checkbox"/> |
| <b>C18</b> Forhold til familie/ektefelle/partner      | <input type="checkbox"/> | <input type="checkbox"/> | <input type="checkbox"/> | <input type="checkbox"/> | <input type="checkbox"/> |
| <b>C19</b> Sosiale forhold                            | <input type="checkbox"/> | <input type="checkbox"/> | <input type="checkbox"/> | <input type="checkbox"/> | <input type="checkbox"/> |
| <b>C20</b> Problemer i forbindelse med veterinæryrket | <input type="checkbox"/> | <input type="checkbox"/> | <input type="checkbox"/> | <input type="checkbox"/> | <input type="checkbox"/> |
| <b>C21</b> Andre forhold                              | <input type="checkbox"/> | <input type="checkbox"/> | <input type="checkbox"/> | <input type="checkbox"/> | <input type="checkbox"/> |

**C22** Har du i løpet av det siste året forsøkt å ta ditt eget liv?

Aldri  Nesten aldri  Noen ganger  Mange ganger

Hvis det har hendt, i hvilken grad mener du de følgende forhold var medvirkende til at det ble så vanskelig for deg?

|                                                       | Betydde ingenting        | Betydde litt             | Betydde endel            | Betydde ganske mye       | Betydde svært mye        |
|-------------------------------------------------------|--------------------------|--------------------------|--------------------------|--------------------------|--------------------------|
| <b>C23</b> Personlige forhold                         | <input type="checkbox"/> | <input type="checkbox"/> | <input type="checkbox"/> | <input type="checkbox"/> | <input type="checkbox"/> |
| <b>C24</b> Forhold til familie/ektefelle/partner      | <input type="checkbox"/> | <input type="checkbox"/> | <input type="checkbox"/> | <input type="checkbox"/> | <input type="checkbox"/> |
| <b>C25</b> Sosiale forhold                            | <input type="checkbox"/> | <input type="checkbox"/> | <input type="checkbox"/> | <input type="checkbox"/> | <input type="checkbox"/> |
| <b>C26</b> Problemer i forbindelse med veterinæryrket | <input type="checkbox"/> | <input type="checkbox"/> | <input type="checkbox"/> | <input type="checkbox"/> | <input type="checkbox"/> |
| <b>C27</b> Andre forhold                              | <input type="checkbox"/> | <input type="checkbox"/> | <input type="checkbox"/> | <input type="checkbox"/> | <input type="checkbox"/> |

**Holdninger til aktiv dødshjelp**

**Aktiv dødshjelp** er en samlebetegnelse på eutanasi og legeassistert selvmord. I noen europeiske land er aktiv dødshjelp tillatt, men i Norge er det ulovlig.

**Eutanasi** er en leges tilsiktede drap på en person ved å sette en sprøyte med dødbringende medikamenter etter at personen frivillig har bedt om det.

**Legeassistert selvmord** er en leges hjelp til selvmord, ved å skaffe til veie medikamenter som personen kan innta selv.

| <b>Ta stilling til følgende påstander</b> |                                                                                                                            | Svært enig               | Litt enig                | Verken enig eller uenig  | Litt uenig               | Svært uenig              |
|-------------------------------------------|----------------------------------------------------------------------------------------------------------------------------|--------------------------|--------------------------|--------------------------|--------------------------|--------------------------|
| <b>C28</b>                                | Legeassistert selvmord bør tillates for personer som har en dødelig sykdom med kort forventet levetid.                     | <input type="checkbox"/> | <input type="checkbox"/> | <input type="checkbox"/> | <input type="checkbox"/> | <input type="checkbox"/> |
| <b>C29</b>                                | Eutanasi bør tillates for personer som har en dødelig sykdom med kort forventet levetid.                                   | <input type="checkbox"/> | <input type="checkbox"/> | <input type="checkbox"/> | <input type="checkbox"/> | <input type="checkbox"/> |
| <b>C30</b>                                | Aktiv dødshjelp bør tillates også for personer som har en uhelbredelig kronisk sykdom, men ikke er døende.                 | <input type="checkbox"/> | <input type="checkbox"/> | <input type="checkbox"/> | <input type="checkbox"/> | <input type="checkbox"/> |
| <b>C31</b>                                | Det finnes tilfeller der det kan være riktig/moralsk forsvarlig av legen å utføre aktiv dødshjelp, selv om det er ulovlig. | <input type="checkbox"/> | <input type="checkbox"/> | <input type="checkbox"/> | <input type="checkbox"/> | <input type="checkbox"/> |

**Holdninger til psykiske lidelser**

| <b>Ta stilling til følgende påstander</b> |                                                                                                  | Svært enig               | Noe enig                 | Ikke sikker/ubestemt     | Noe uenig                | Svært uenig              |
|-------------------------------------------|--------------------------------------------------------------------------------------------------|--------------------------|--------------------------|--------------------------|--------------------------|--------------------------|
| <b>C32</b>                                | Behandling kan hjelpe mennesker med psykiske lidelser til å føre et normalt liv.                 | <input type="checkbox"/> | <input type="checkbox"/> | <input type="checkbox"/> | <input type="checkbox"/> | <input type="checkbox"/> |
| <b>C33</b>                                | Folk er generelt sett omsorgsfulle og positivt innstilte overfor personer med psykiske lidelser. | <input type="checkbox"/> | <input type="checkbox"/> | <input type="checkbox"/> | <input type="checkbox"/> | <input type="checkbox"/> |

## D Personlige egenskaper

### Ta stilling til følgende påstander

|                                                                                                                    | Stemmer ikke             | Stemmer                  |
|--------------------------------------------------------------------------------------------------------------------|--------------------------|--------------------------|
| <b>D1</b> Det er vanskelig for meg å stole på folk ettersom de så ofte vender seg mot meg eller lar meg i stikken  | <input type="checkbox"/> | <input type="checkbox"/> |
| <b>D2</b> På en eller annen måte føler jeg at jeg ikke vet hvordan jeg skal oppføre meg sammen med andre mennesker | <input type="checkbox"/> | <input type="checkbox"/> |
| <b>D3</b> Jeg opplever meg selv som helt ulik til ulike tidspunkter                                                | <input type="checkbox"/> | <input type="checkbox"/> |
| <b>D4</b> Jeg føler meg ensom mesteparten av tiden                                                                 | <input type="checkbox"/> | <input type="checkbox"/> |
| <b>D5</b> Folk som virker bra til å begynne med, ender ofte opp med å skuffe meg                                   | <input type="checkbox"/> | <input type="checkbox"/> |
| <b>D6</b> Jeg føler det av og til som om jeg lever i en tåke                                                       | <input type="checkbox"/> | <input type="checkbox"/> |
| <b>D7</b> Noen ganger føler jeg at jeg ikke er meg selv                                                            | <input type="checkbox"/> | <input type="checkbox"/> |
| <b>D8</b> Folk kan oppfatte meg som uhøflig eller hensynsløs uten at jeg skjønner hvorfor                          | <input type="checkbox"/> | <input type="checkbox"/> |
| <b>D9</b> Av og til får jeg rare tanker i hodet som jeg ikke er i stand til å få vekk                              | <input type="checkbox"/> | <input type="checkbox"/> |

### D10 Eventuelle kommentarer til spørreskjemaet?
