# Supplementary material for: Prevalence and individual and work-related factors associated with suicidal thoughts and behaviours among veterinarians in Norway: a cross-sectional, nationwide survey-based study (the NORVET study)
Source: HighWire-hosted journal article supplement (doi:10.1136/bmjopen-2021-055827), 2022-01-01
Supplement: bmjopen-2021-055827supp003_data_supplement.pdf [file bmjopen-2021-055827supp003_data_supplement.pdf]

Supplementary File 3 – Additional analysis predictor model – Predictors of serious suicidal thoughts among veterinarians in Norway, without mental distress and reality weakness

|                                                                    | Adjusted <sup>2</sup> |                |
|--------------------------------------------------------------------|-----------------------|----------------|
|                                                                    | OR                    | 95 % CI        |
| Female                                                             | 0.88                  | 0.50 to 1.53   |
| Age                                                                | 1.02                  | 0.92 to 1.13   |
| Single                                                             | 2.17***               | 1.44 to 3.27   |
| Negative life events <sup>1</sup>                                  | 1.61***               | 1.39 to 1.86   |
| Alcohol to cope                                                    | 1.52*                 | 1.02 to 2.27   |
| <b>Main field of work (ref. category= mixed clinical practice)</b> |                       |                |
| Companion animals                                                  | 1.17                  | 0.59 to 2.30   |
| Production animals                                                 | 1.72                  | 0.71 to 4.19   |
| Equine practice                                                    | 1.02                  | 0.34 to 3.04   |
| Aquaculture                                                        | 1.23                  | 0.39 to 3.89   |
| Public administration                                              | 1.47                  | 0.65 to 3.31   |
| Academia/research                                                  | 1.53                  | 0.59 to 4.01   |
| Other                                                              | 0.80                  | 0.29 to 2.17   |
| <b>Job stress</b>                                                  |                       |                |
| Emotional demands                                                  | 1.05*                 | 1.003 to 1.104 |
| Work/life-balance                                                  | 1.08**                | 1.03 to 1.13   |
| Fear of complaints                                                 | 1.08*                 | 1.001 to 1.164 |

<sup>1</sup>The variable life events was entered into the model as a weighted variable ('Negative life events'), comprising the sum score of life events that was significant in a univariate model with the dependent variable.

\*P<0.05

\*\*P<0.01

\*\*\*P<0.001

<sup>2</sup>In the adjusted model, all listed variables were simultaneously entered in the model, i.e. gender, age, civil status, negative life events, use of alcohol to cope, main field of work and the three job stress factors.
