# Supplementary material for: Prevalence and individual and work-related factors associated with suicidal thoughts and behaviours among veterinarians in Norway: a cross-sectional, nationwide survey-based study (the NORVET study)
Source: HighWire-hosted journal article supplement (doi:10.1136/bmjopen-2021-055827), 2022-01-01

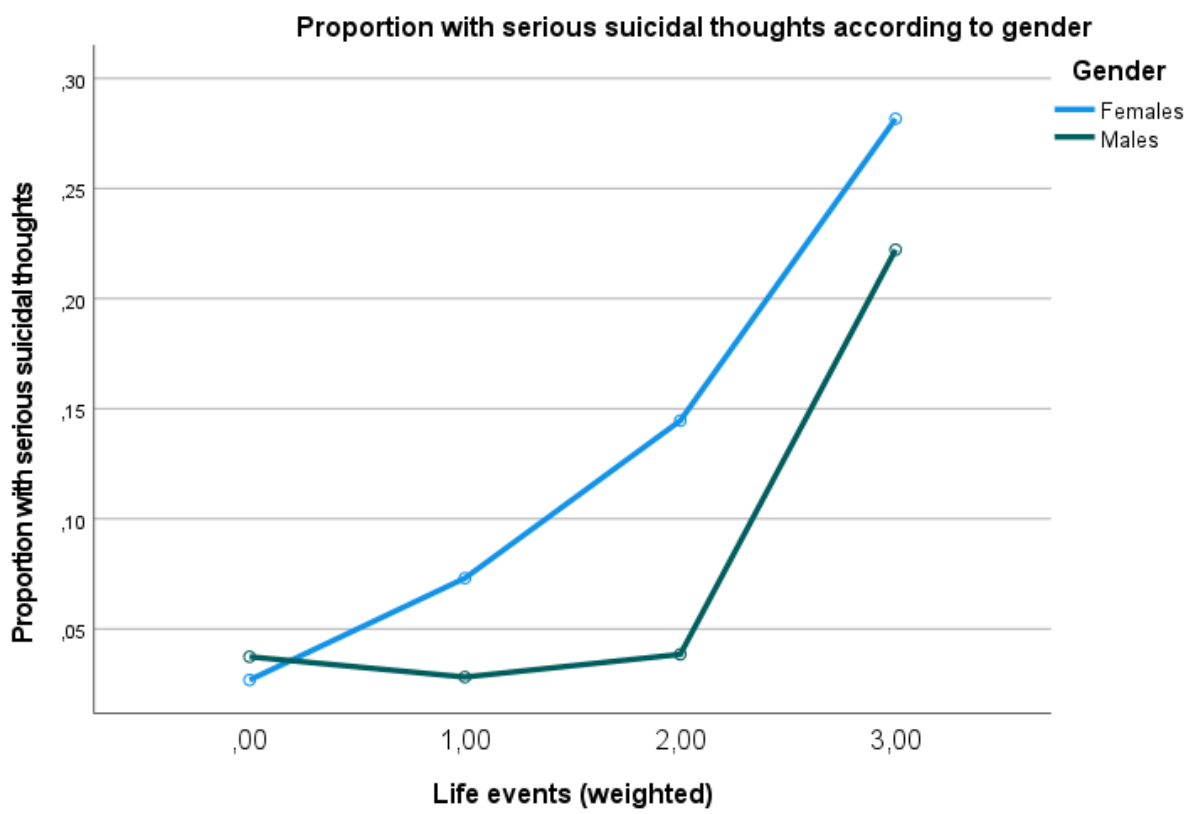

Supplement: bmjopen-2021-055827supp004_data_supplement.pdf [file bmjopen-2021-055827supp004_data_supplement.pdf]
