# Supplementary material for: Prevalence and individual and work-related factors associated with suicidal thoughts and behaviours among veterinarians in Norway: a cross-sectional, nationwide survey-based study (the NORVET study)
Source: HighWire-hosted journal article supplement (doi:10.1136/bmjopen-2021-055827), 2022-01-01
Supplement: bmjopen-2021-055827supp006_data_supplement.pdf [file bmjopen-2021-055827supp006_data_supplement.pdf]

Supplementary File 4-1 (Interaction between life events and gender): Illustration of the two-way interaction between gender and life events (weighted). The life events scale has been divided into four categories to improve readability of the graph. The gradient is significantly steeper for females than males.

Supplementary File 4-2 (Interactions between work/life balance and gender): Illustration of the two-way interaction between gender and work/life-balance. The increase in suicidal thoughts with higher work/life imbalance was significantly stronger among males than among females.
